# Supplementary material for: Prediction of suitable catalyst by 1H NMR: asymmetric synthesis of multisubstituted biaryls by chiral phosphoric acid catalyzed asymmetric bromination
Source: Royal Society of Chemistry journal article supplement (doi:10.1039/c3sc52142g), 2013-01-01

# **Prediction of Suitable Catalyst by $^1\text{H}$ NMR: Asymmetric Synthesis of Multisubstituted Biaryls by Chiral Phosphoric Acid Catalyzed Asymmetric Bromination**

**Keiji Mori,<sup>†</sup> Yuki Ichikawa,<sup>†</sup> Manato Kobayashi,<sup>†</sup> Yukihiro Shibata,<sup>††</sup>  
Masahiro Yamanaka,<sup>††</sup> and Takahiko Akiyama<sup>\*†</sup>**

*Department of Chemistry, Faculty of Science,  
Gakushuin University,*

*1-5-1 Mejiro, Toshima-ku, Tokyo 171-8588, Japan<sup>†</sup>*

*Department of Chemistry and Research Center for Smart Molecules, Faculty of Science,  
Rikkyo University,*

*3-34-1 Nishi-Ikebukuro, Toshima-ku, Tokyo 171-8501, Japan<sup>† †</sup>*

[takahiko.akiyama@gakushuin.ac.jp](mailto:takahiko.akiyama@gakushuin.ac.jp)

## ***Supporting Information***

Scanned images of  $^1\text{H}$ - and  $^{13}\text{C}$ -NMR of new compounds

S1

<sup>1</sup>H NMR spectrum of **3a**.

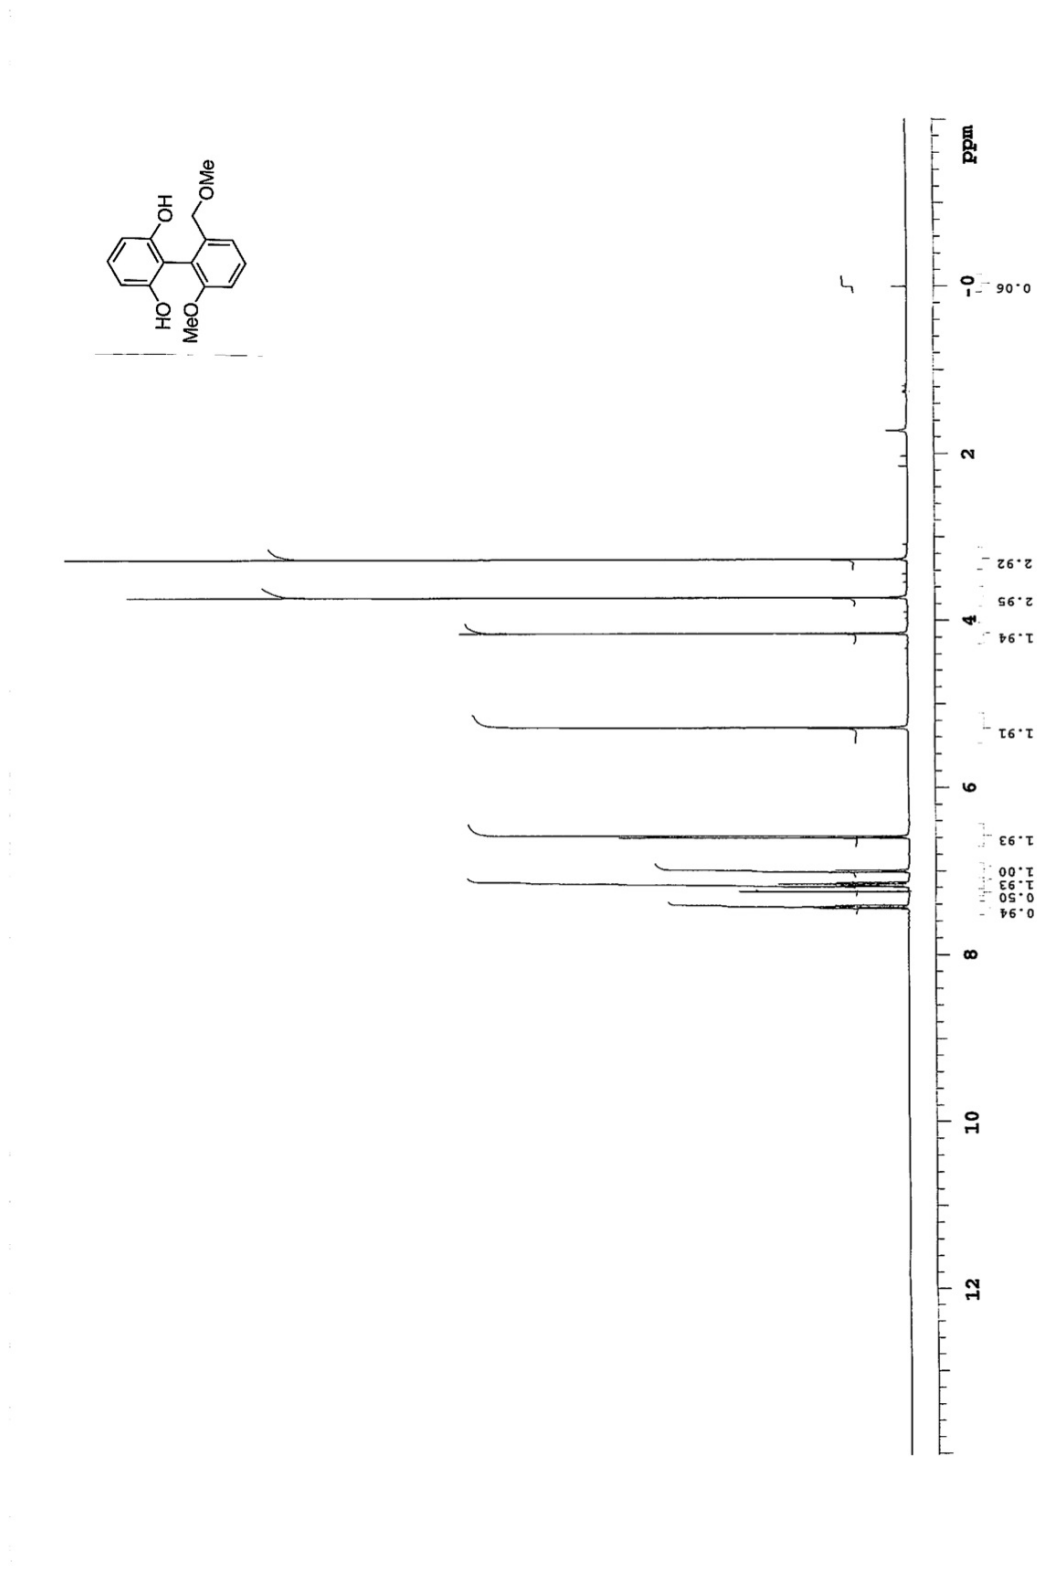

$^1\text{H}$  NMR spectrum of the mixture of **3a** and **1a** (X = Ph).

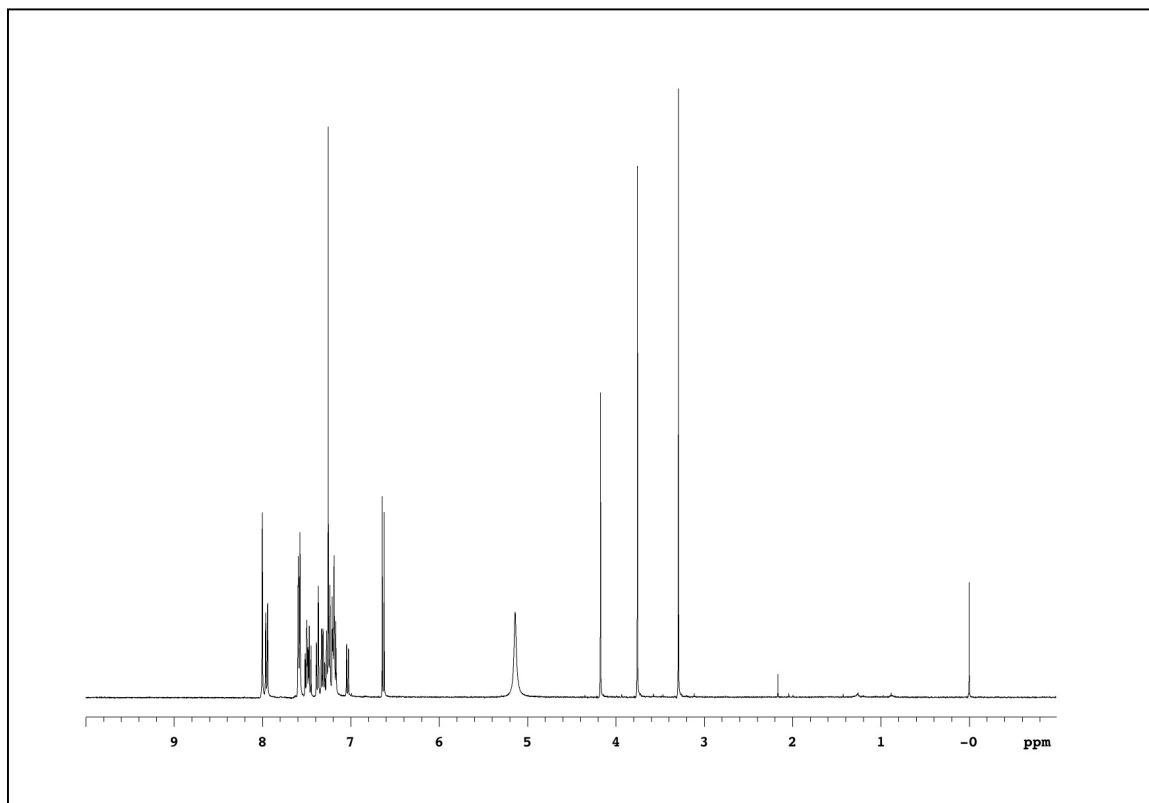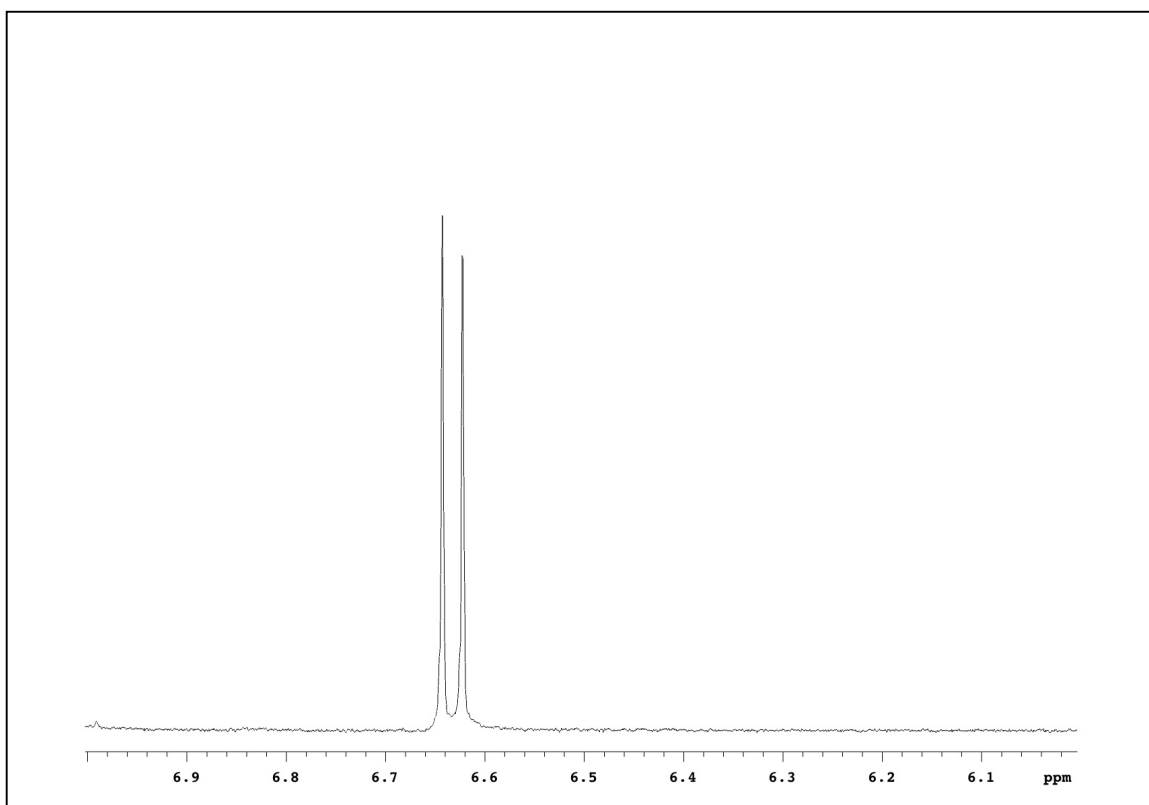

$^1\text{H}$  NMR spectrum of the mixture of **3a** and **1b** ( $\text{X} = p\text{-NO}_2\text{C}_6\text{H}_4$ ).

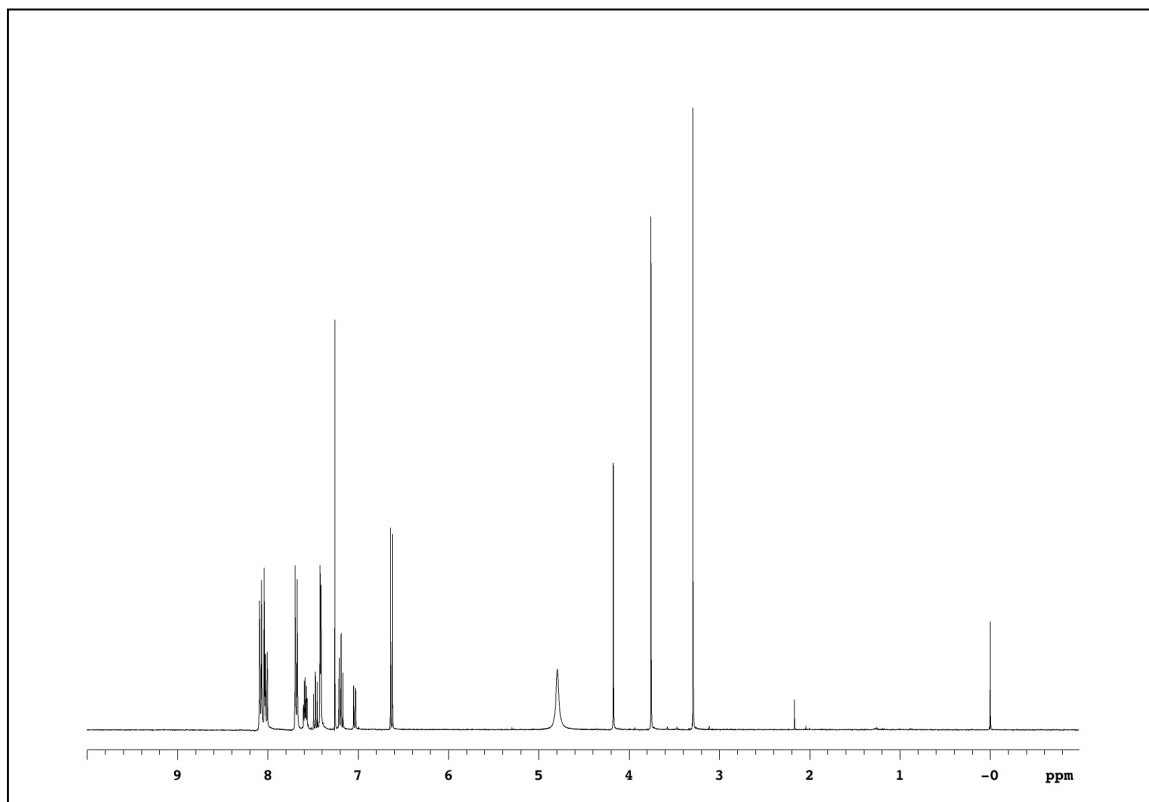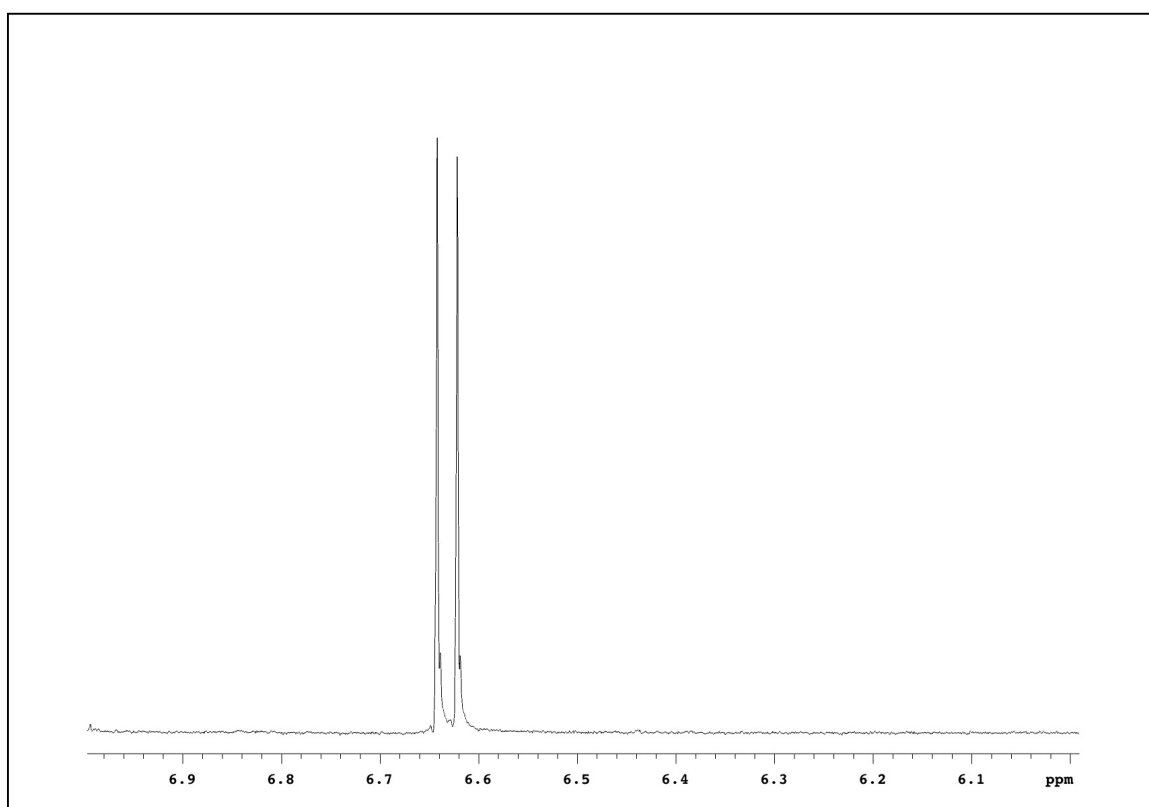



$^1\text{H}$  NMR spectrum of the mixture of **3a** and **1c** ( $\text{X} = p\text{-CF}_3\text{C}_6\text{H}_4$ ).

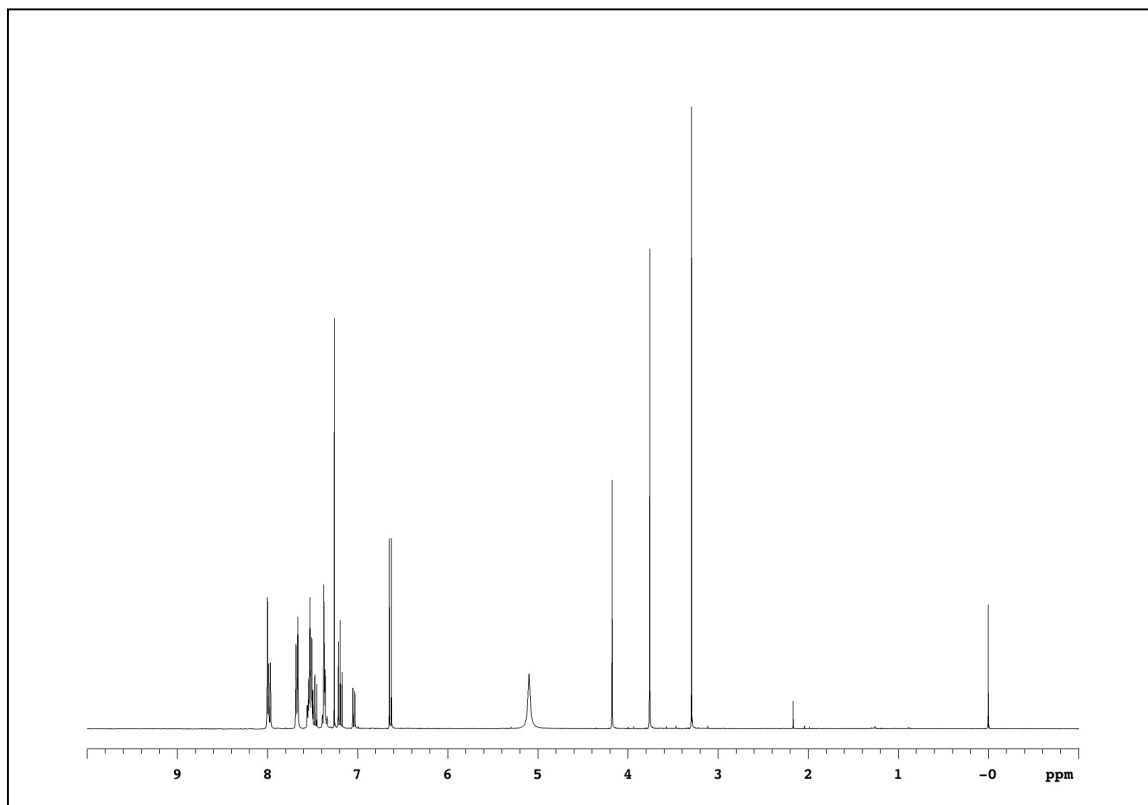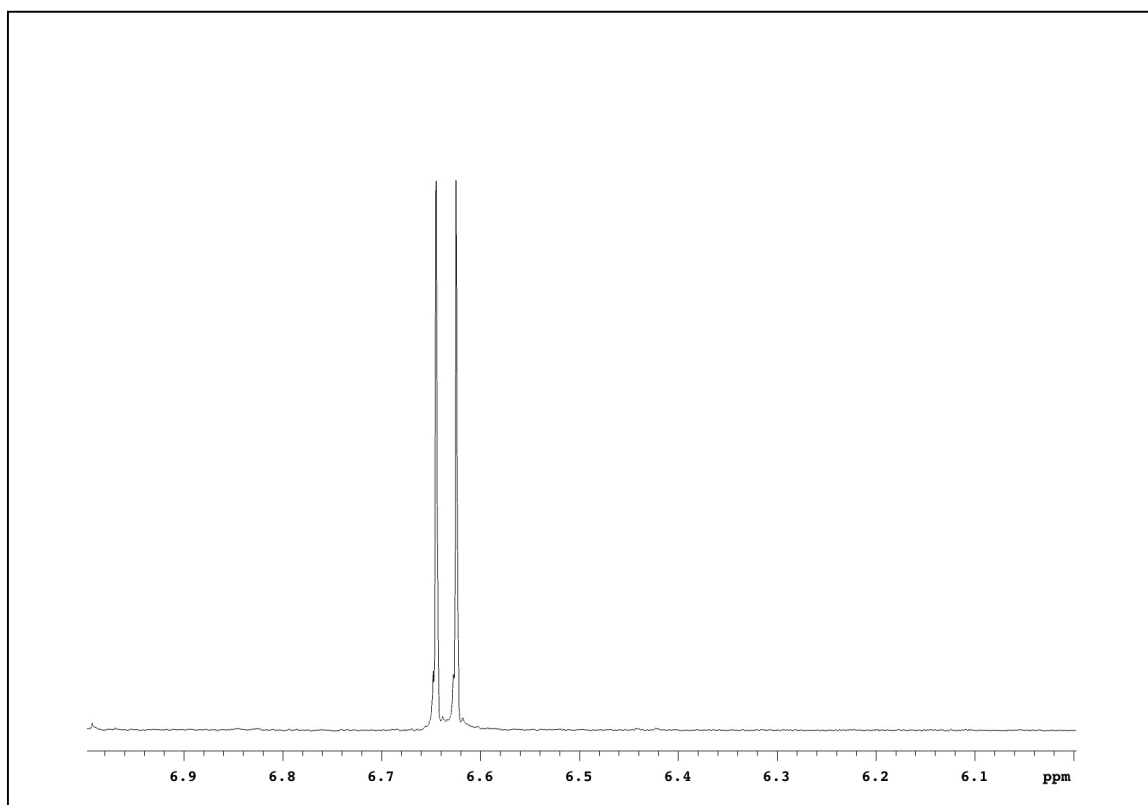

$^1\text{H}$  NMR spectrum of the mixture of **3a** and **1d** ( $\text{X} = \text{SiPh}_3$ ).

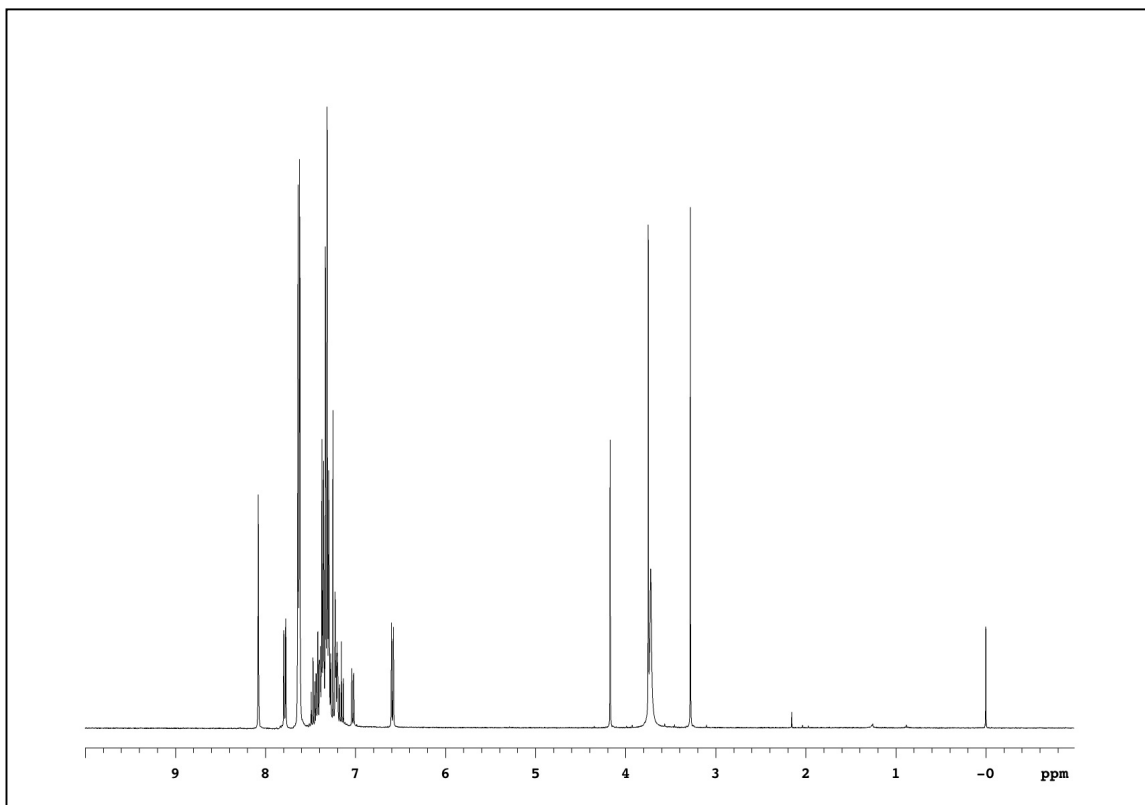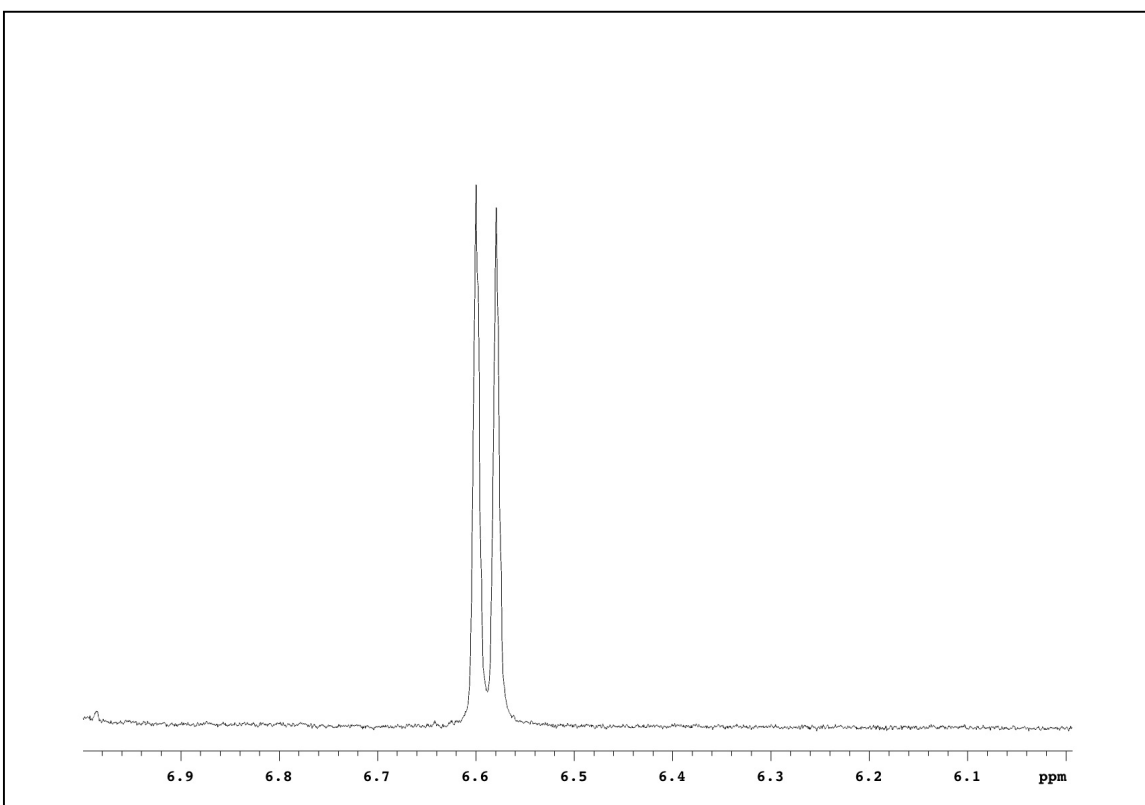

$^1\text{H}$  NMR spectrum of the mixture of **3a** and **1e** ( $\text{X} = 2,4,6\text{-}(i\text{-Pr})_3\text{C}_6\text{H}_2$ ).

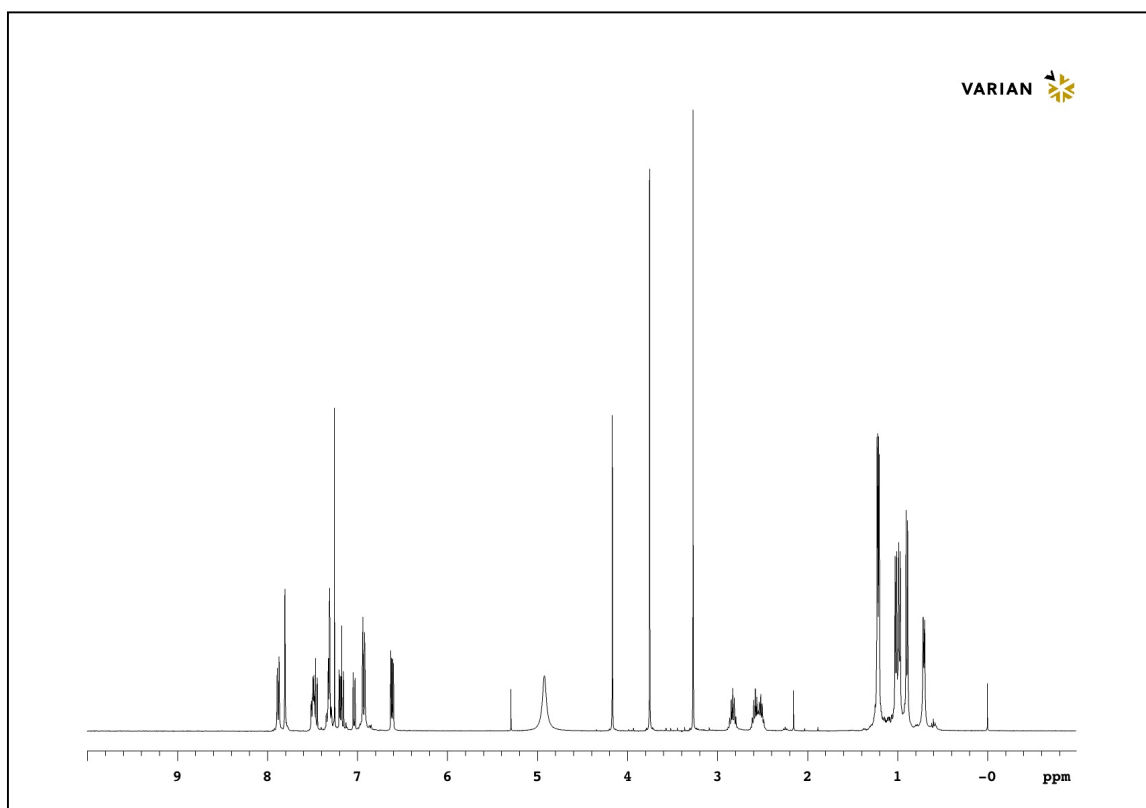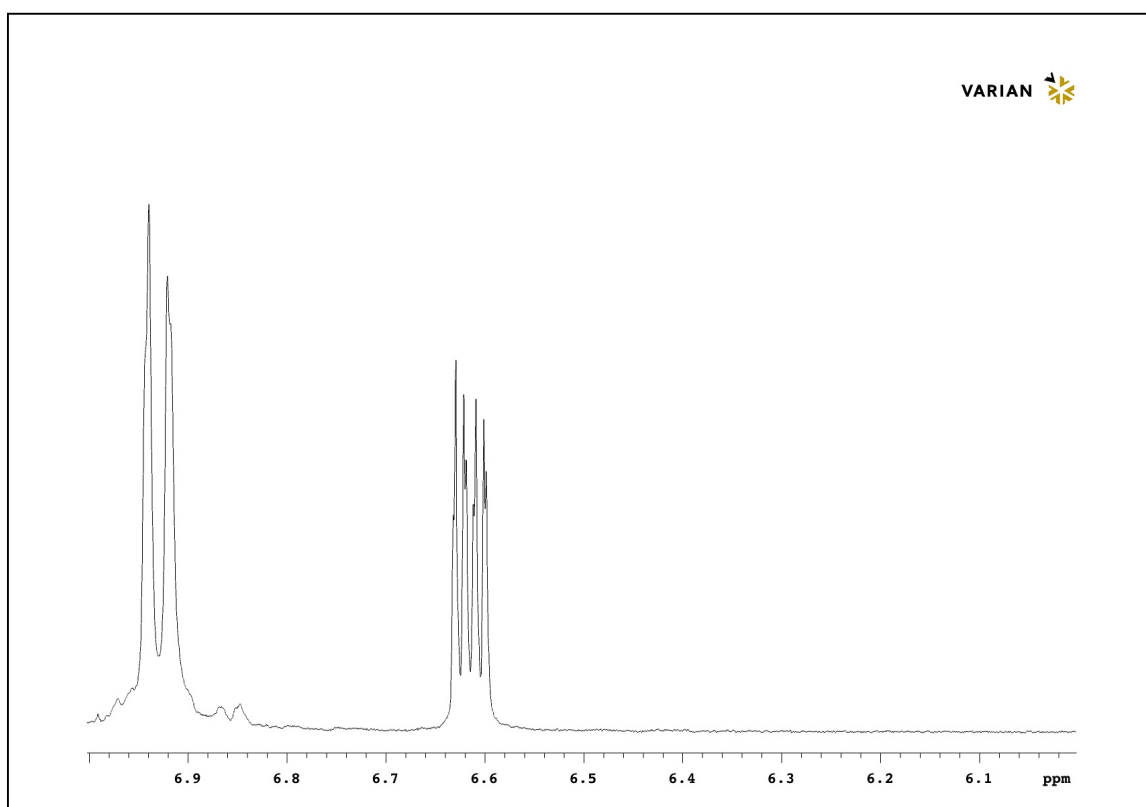

$^1\text{H}$  NMR spectrum of the mixture of **3a** and **1f** (X = 1-naphthyl).

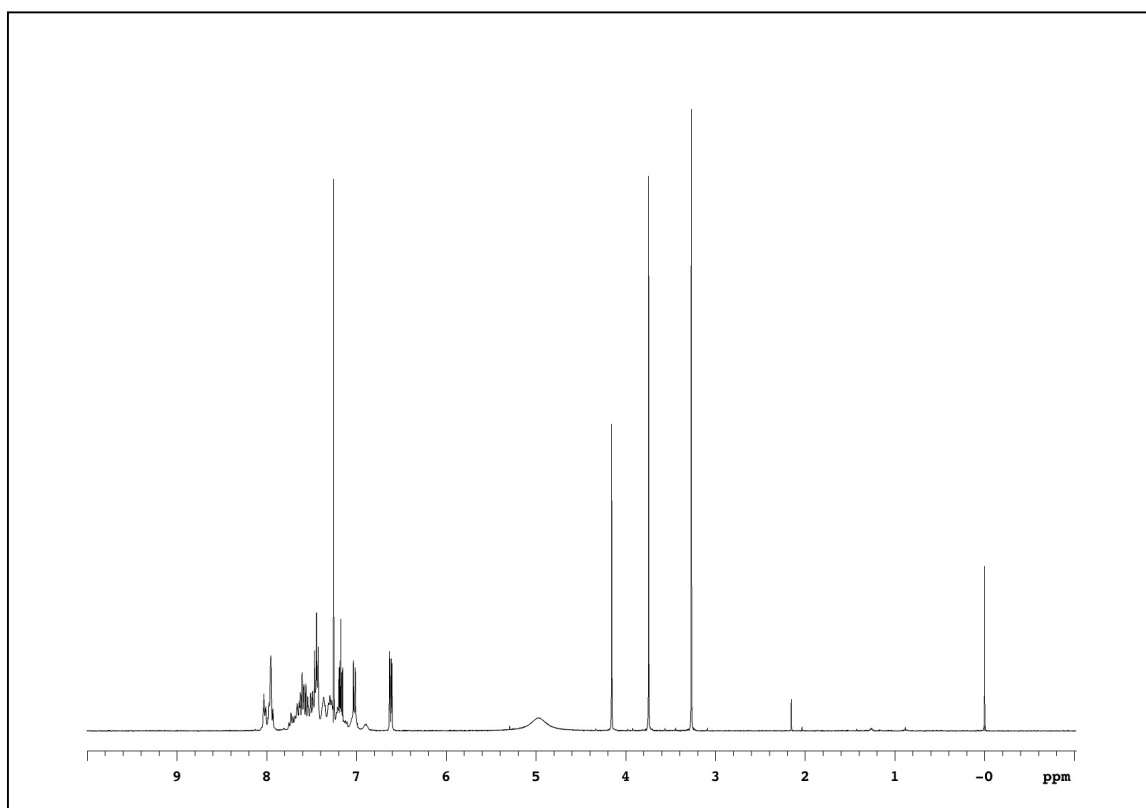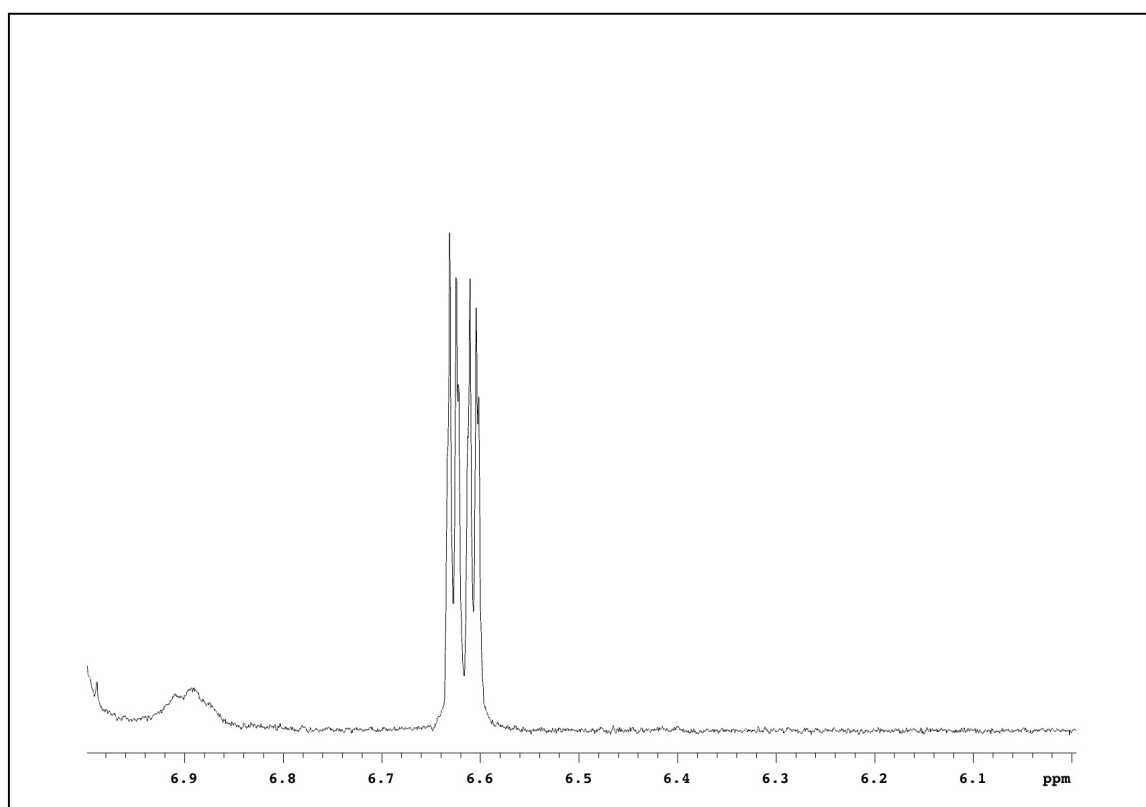

$^1\text{H}$  NMR spectrum of the mixture of **3a** and **1g** (X = 2-naphthyl).

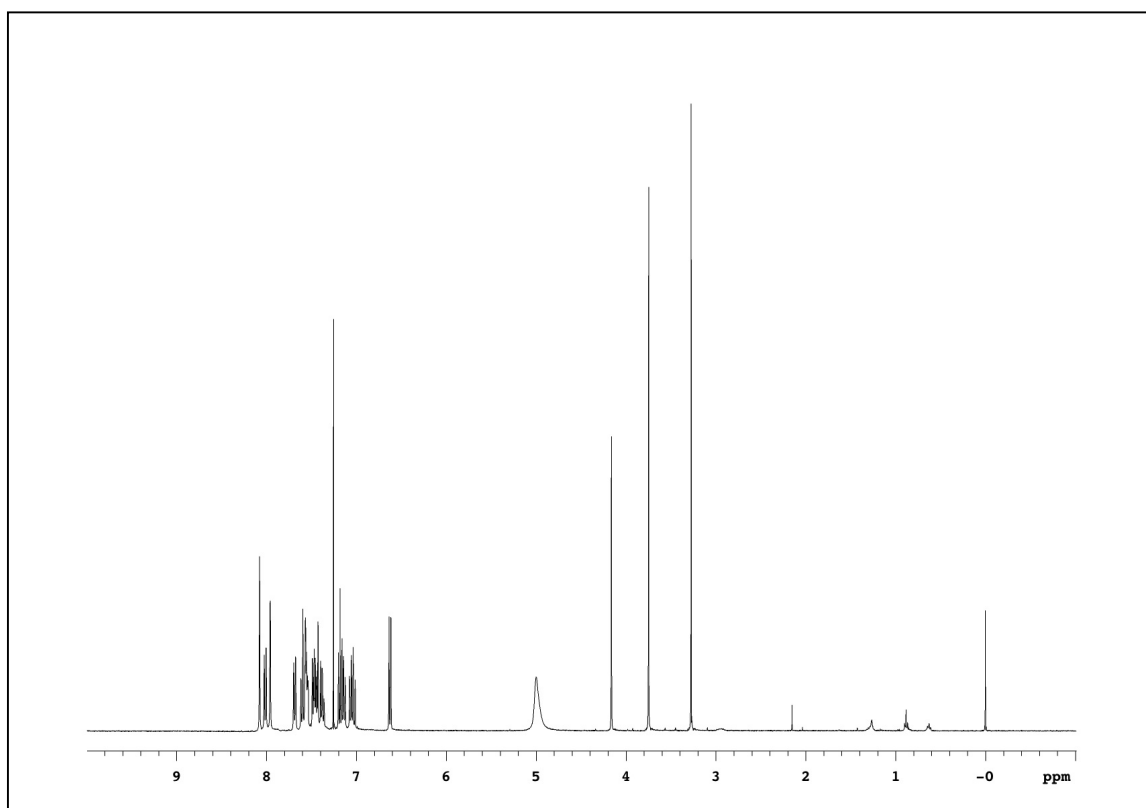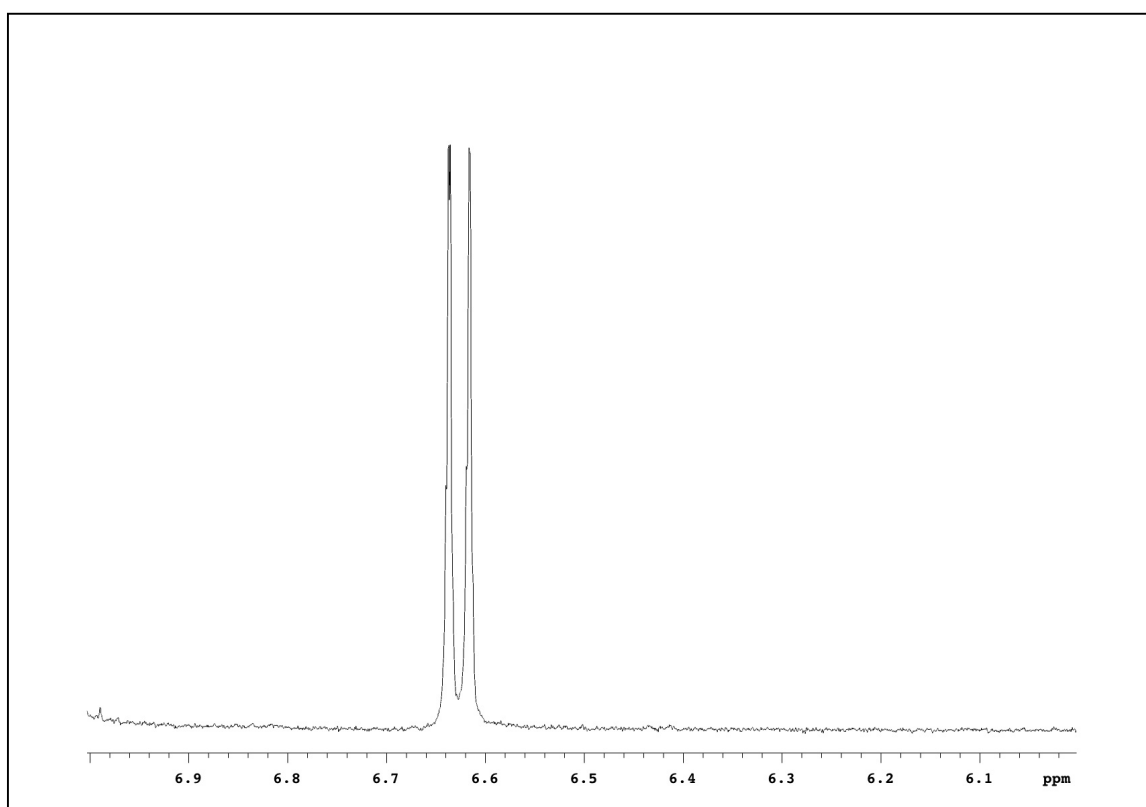

$^1\text{H}$  NMR spectrum of the mixture of **3a** and **1h** (X = 9-phenanthryl).

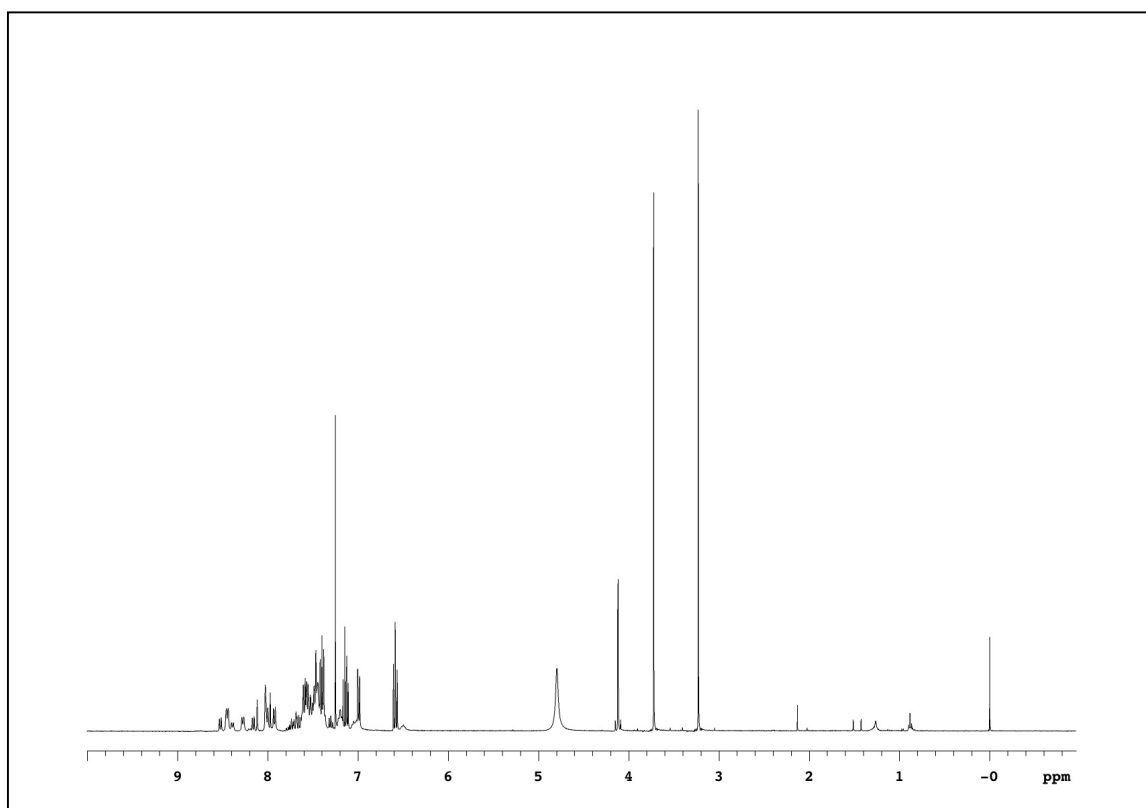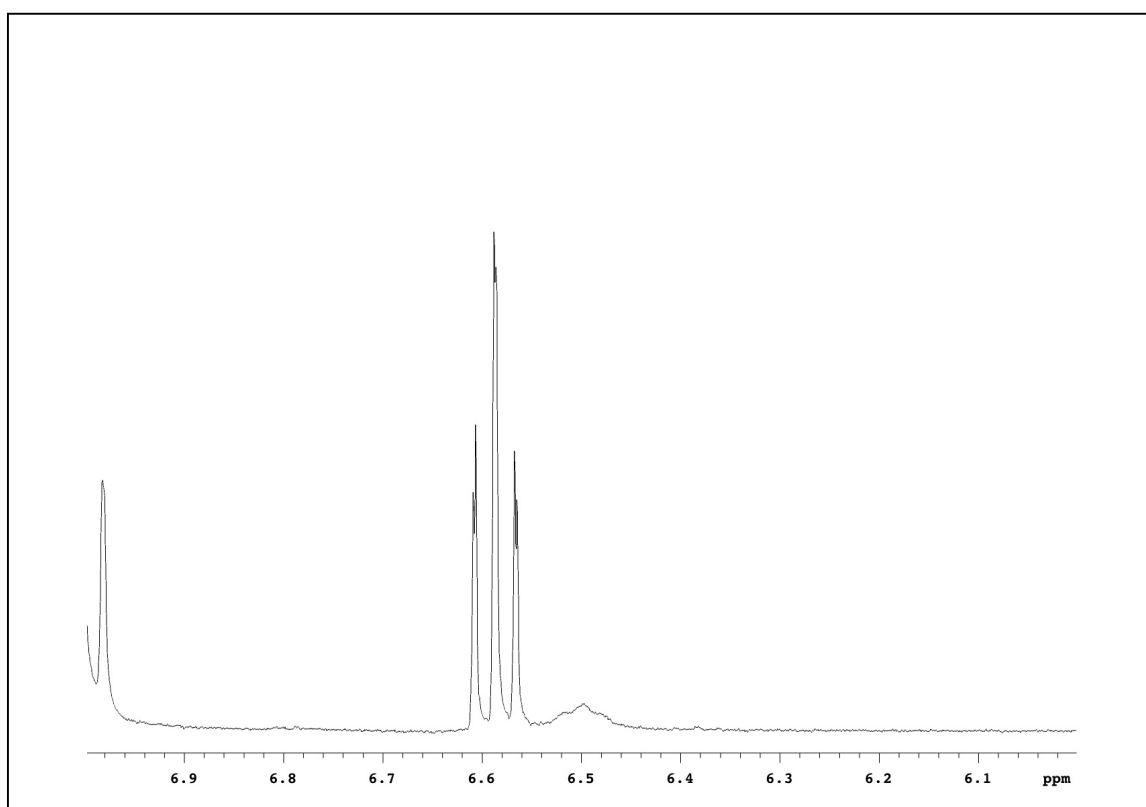

$^1\text{H}$  NMR spectrum of the mixture of **3a** and **1i** (X = 1-pyrenyl).

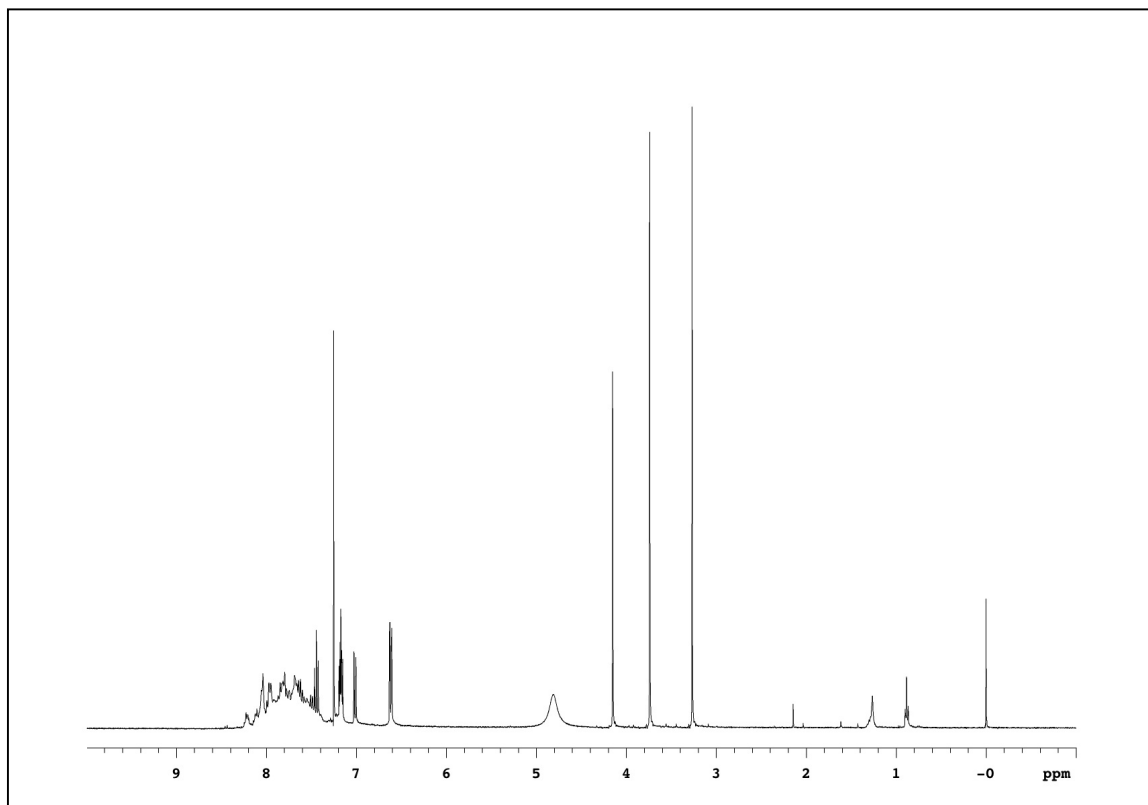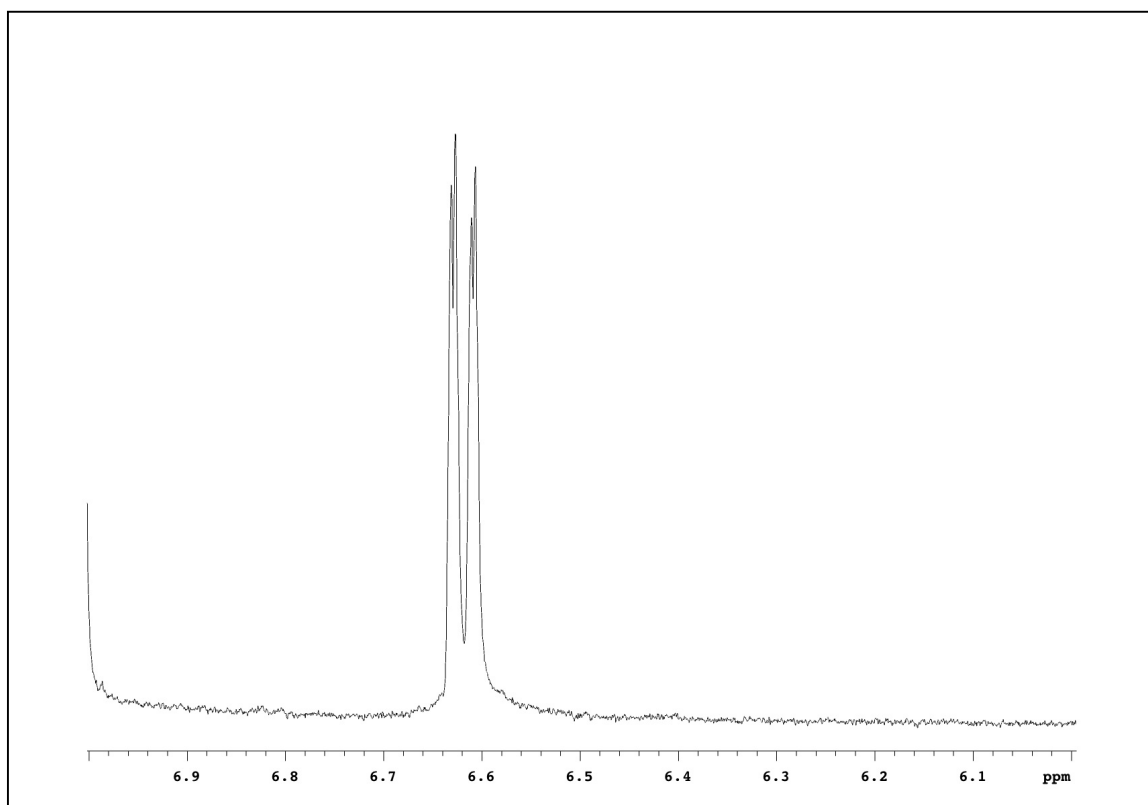

$^1\text{H}$  NMR spectrum of the mixture of **3a** and **1j** (X = 9-anthryl).

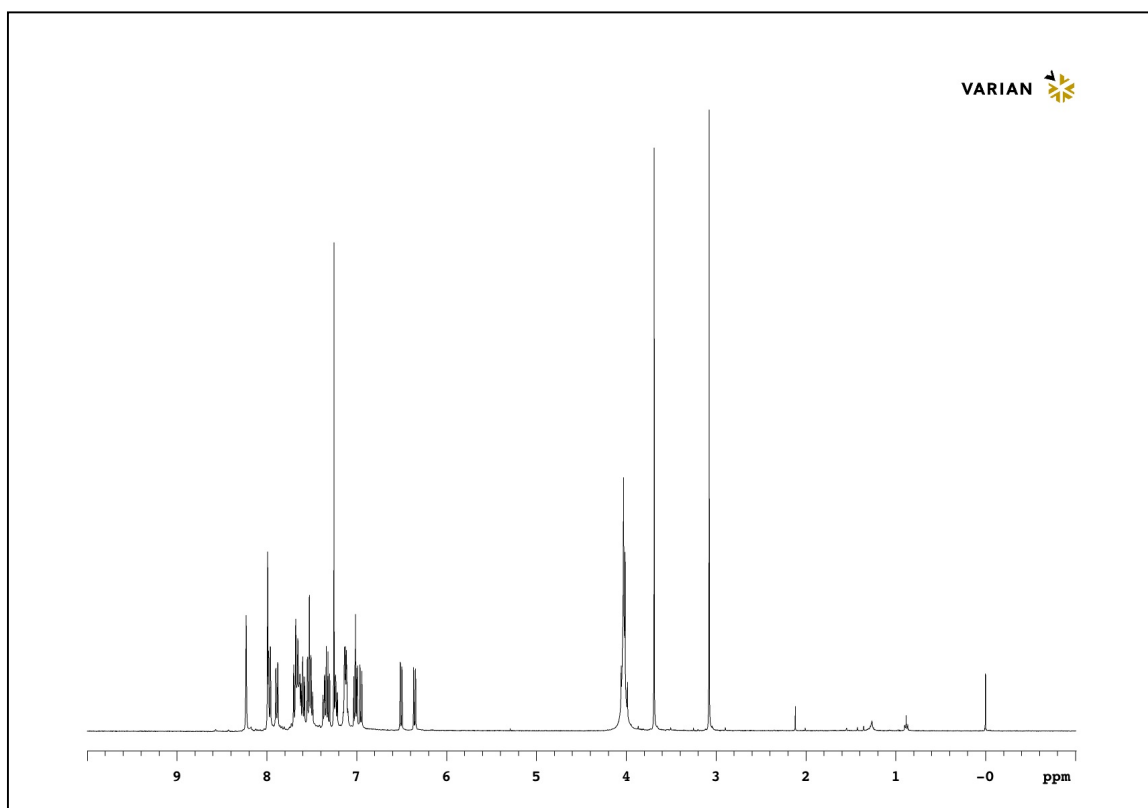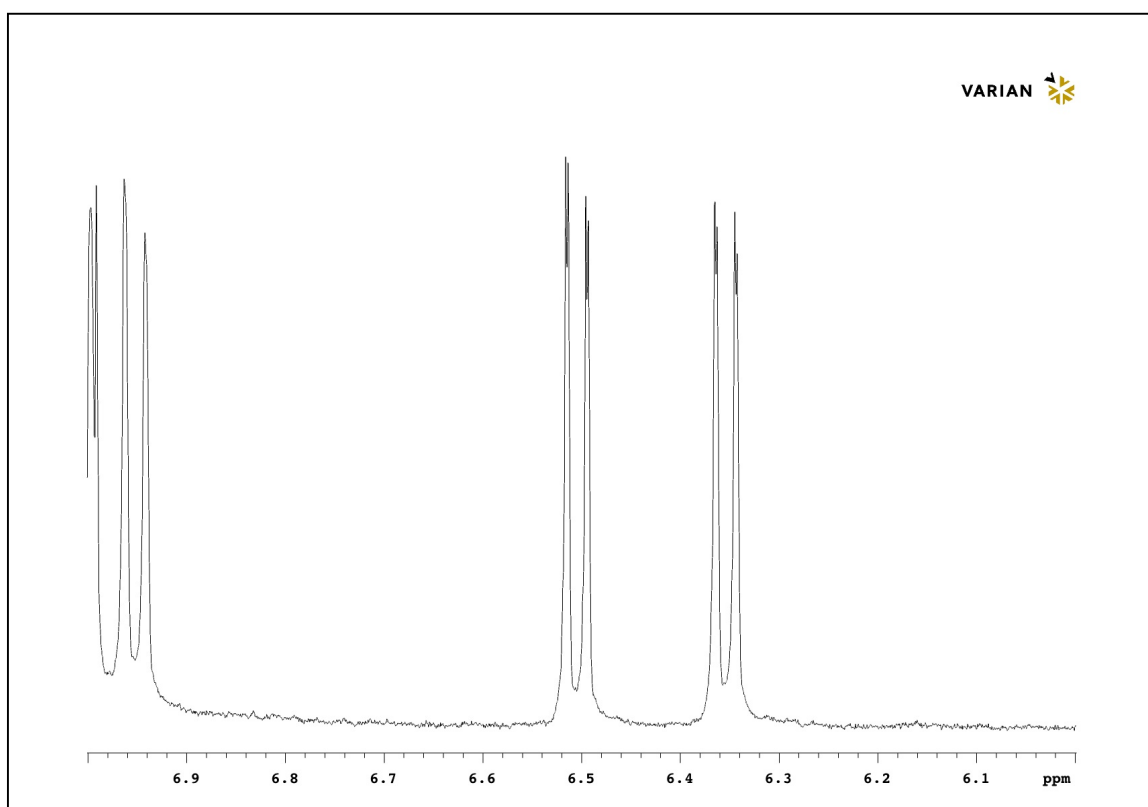



$^1\text{H}$  NMR spectrum of the mixture of **3a** and **2j** (X = 9-anthryl).

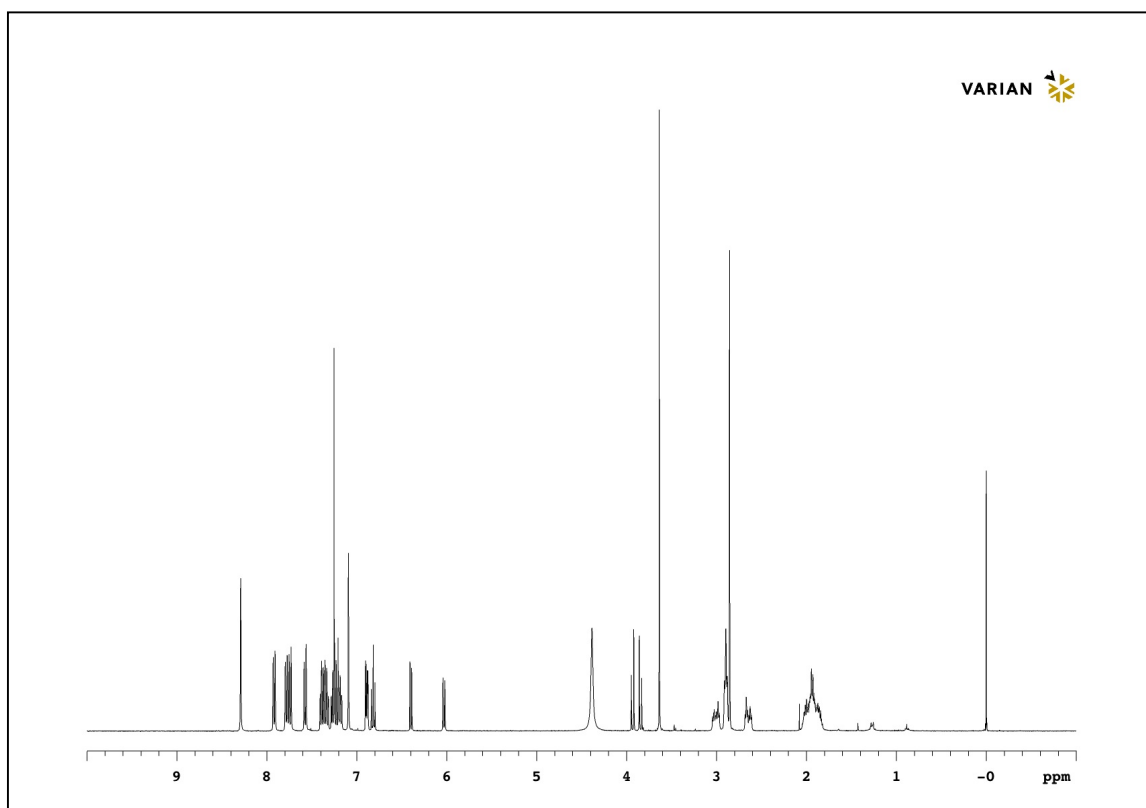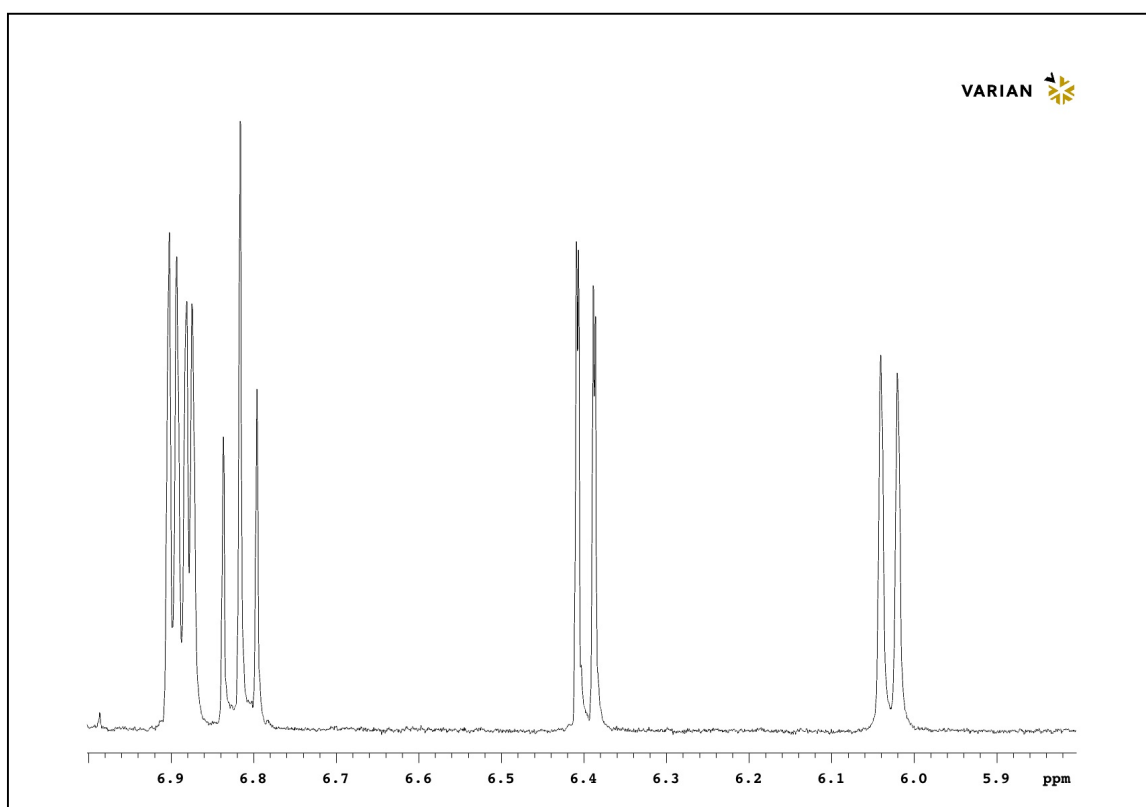

$^1\text{H}$  NMR spectrum of the mixture of **3a** and **2j** (X = 9-anthryl) and MS13X.

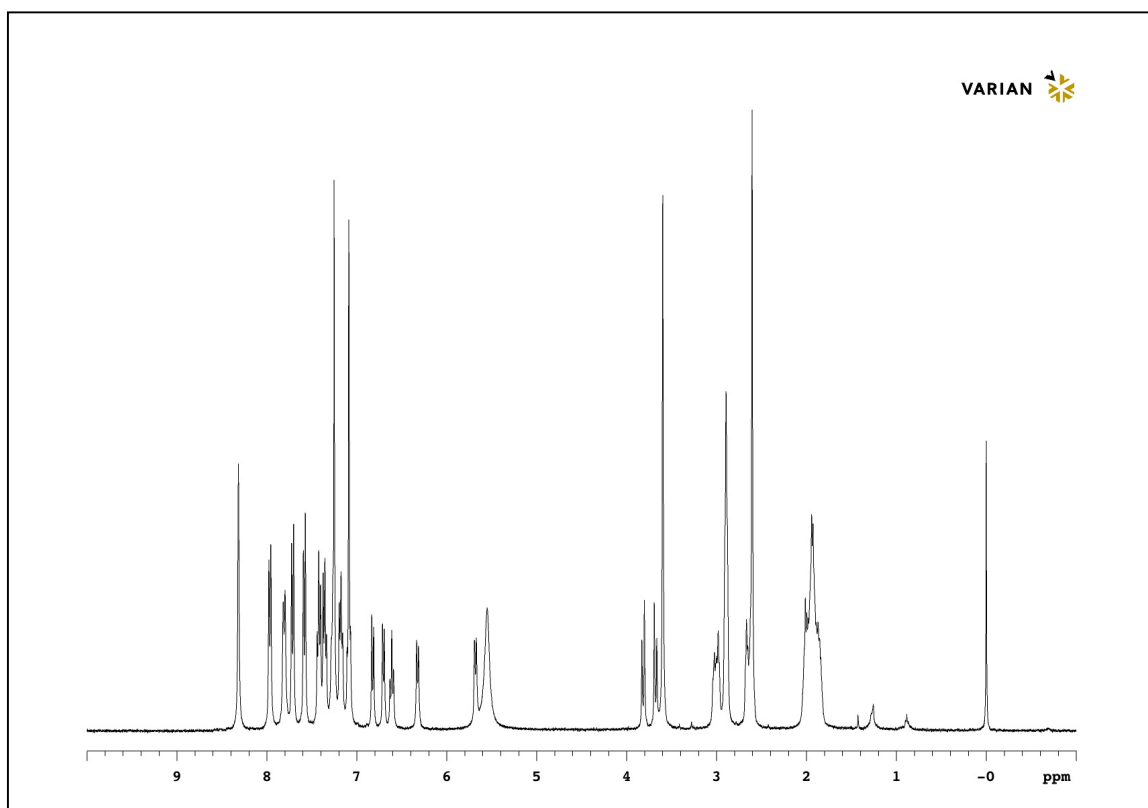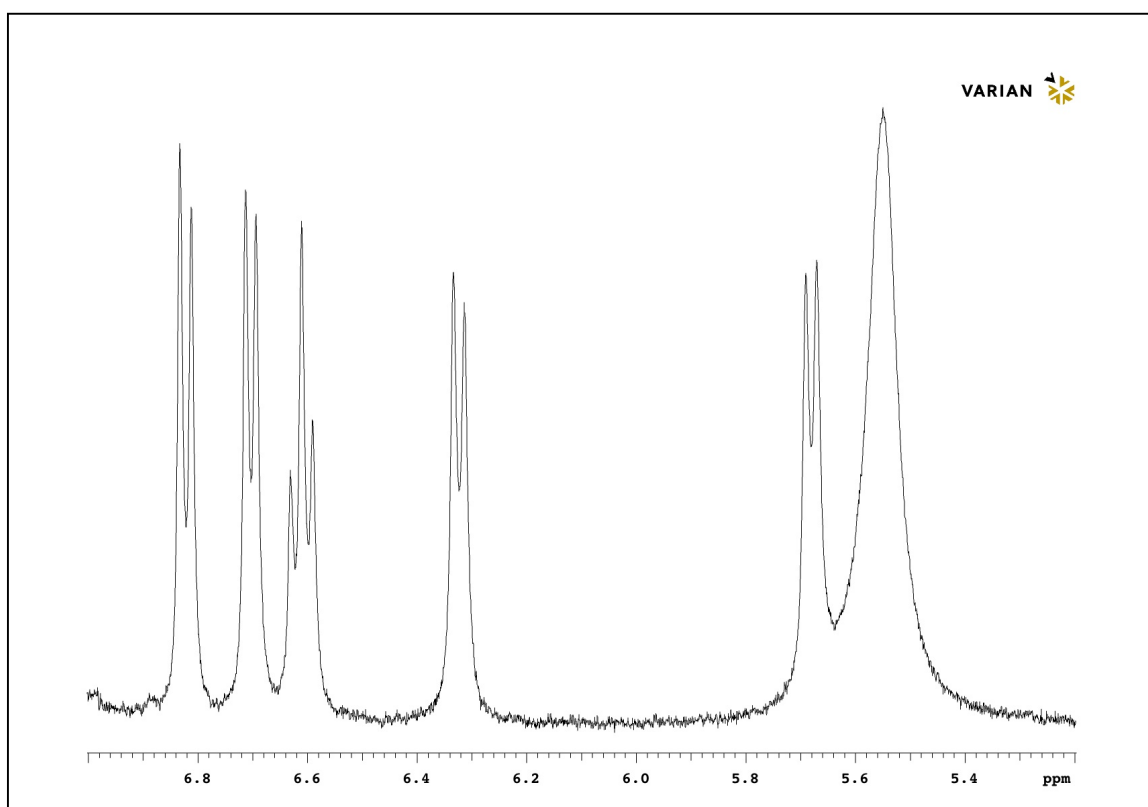

$^1\text{H}$  NMR spectrum of **s15**.

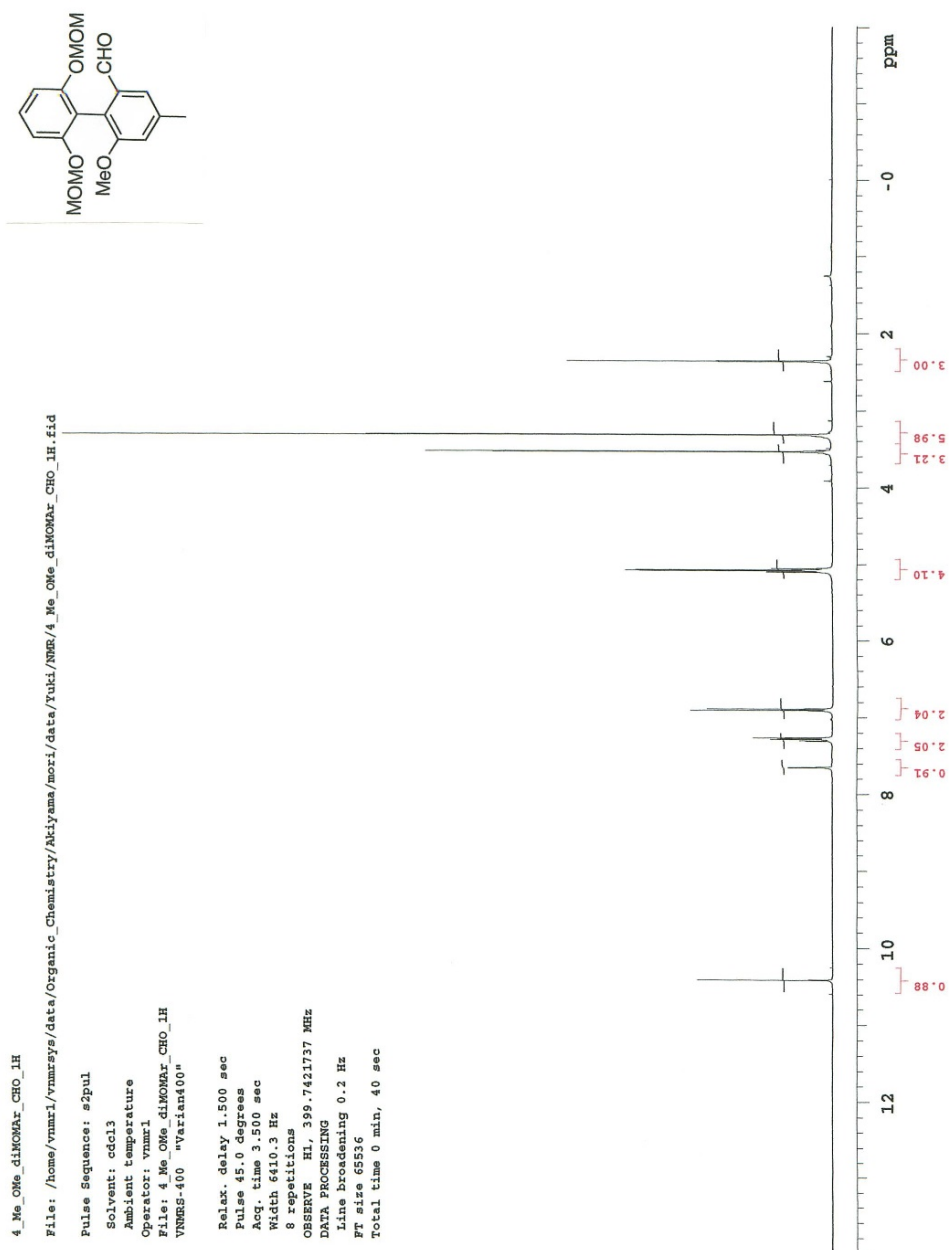

$^{13}\text{C}$  NMR spectrum of **s15**.

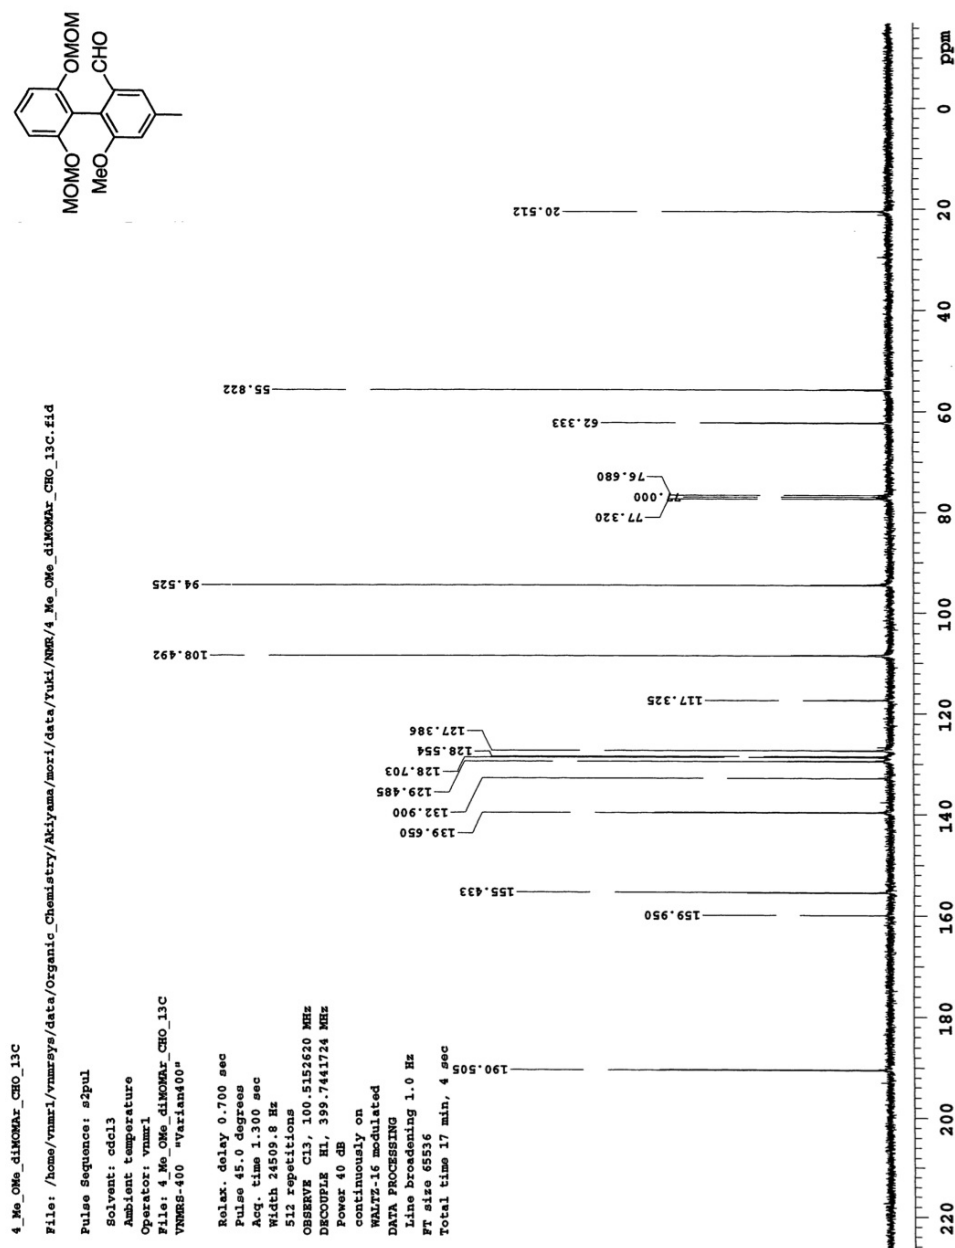

$^1\text{H}$  NMR spectrum of **3n**.

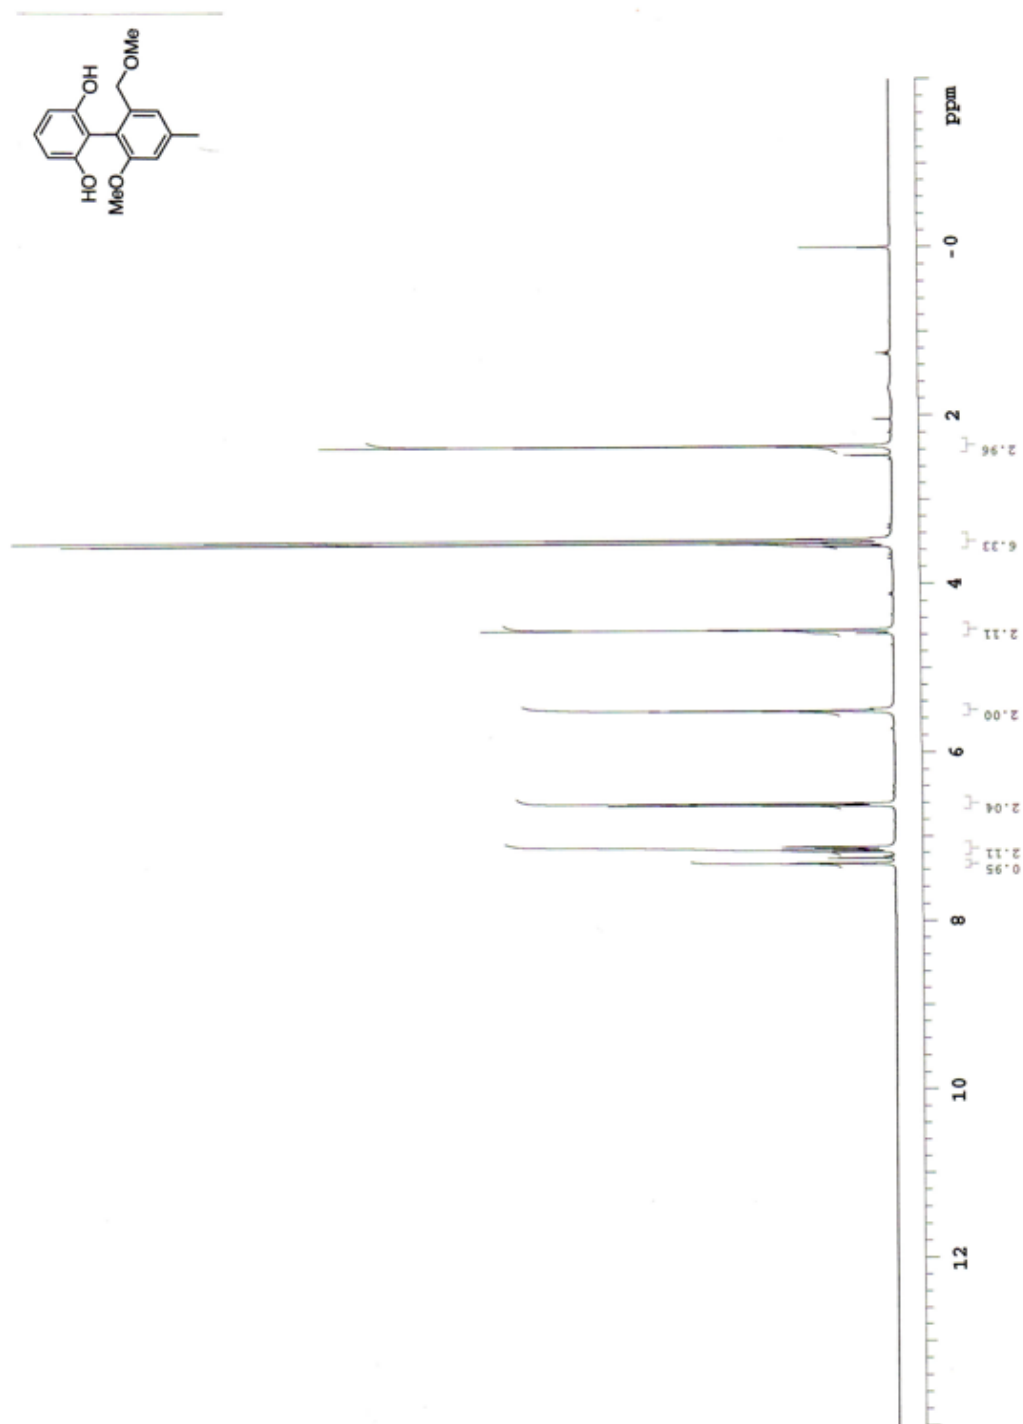

$^{13}\text{C}$  NMR spectrum of **3n**.

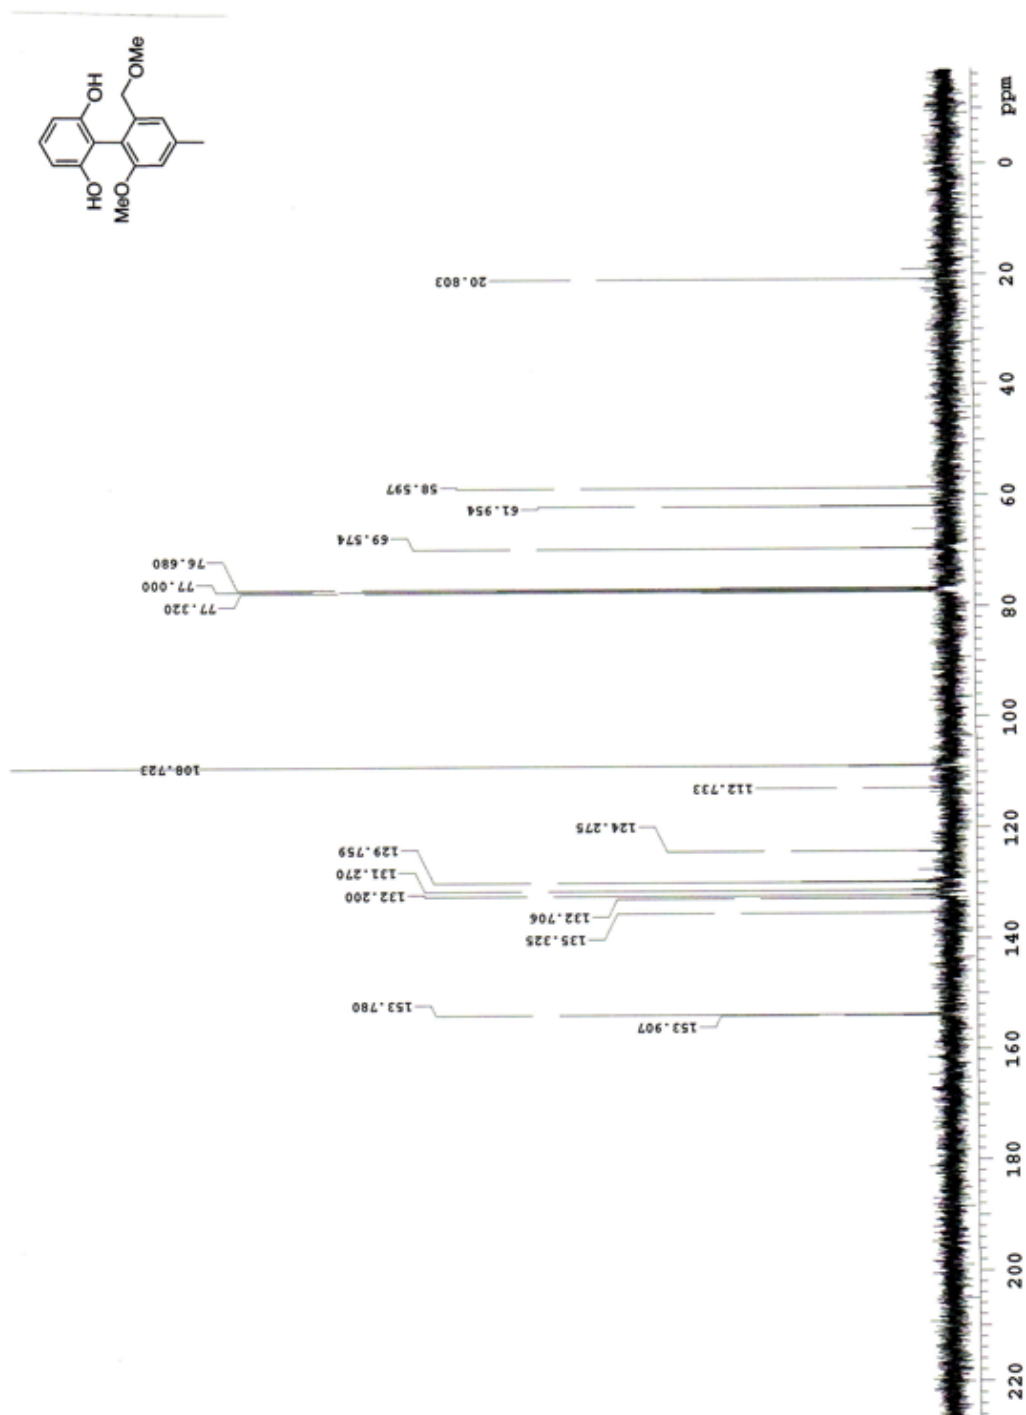

$^1\text{H}$  NMR spectrum of **3o**.

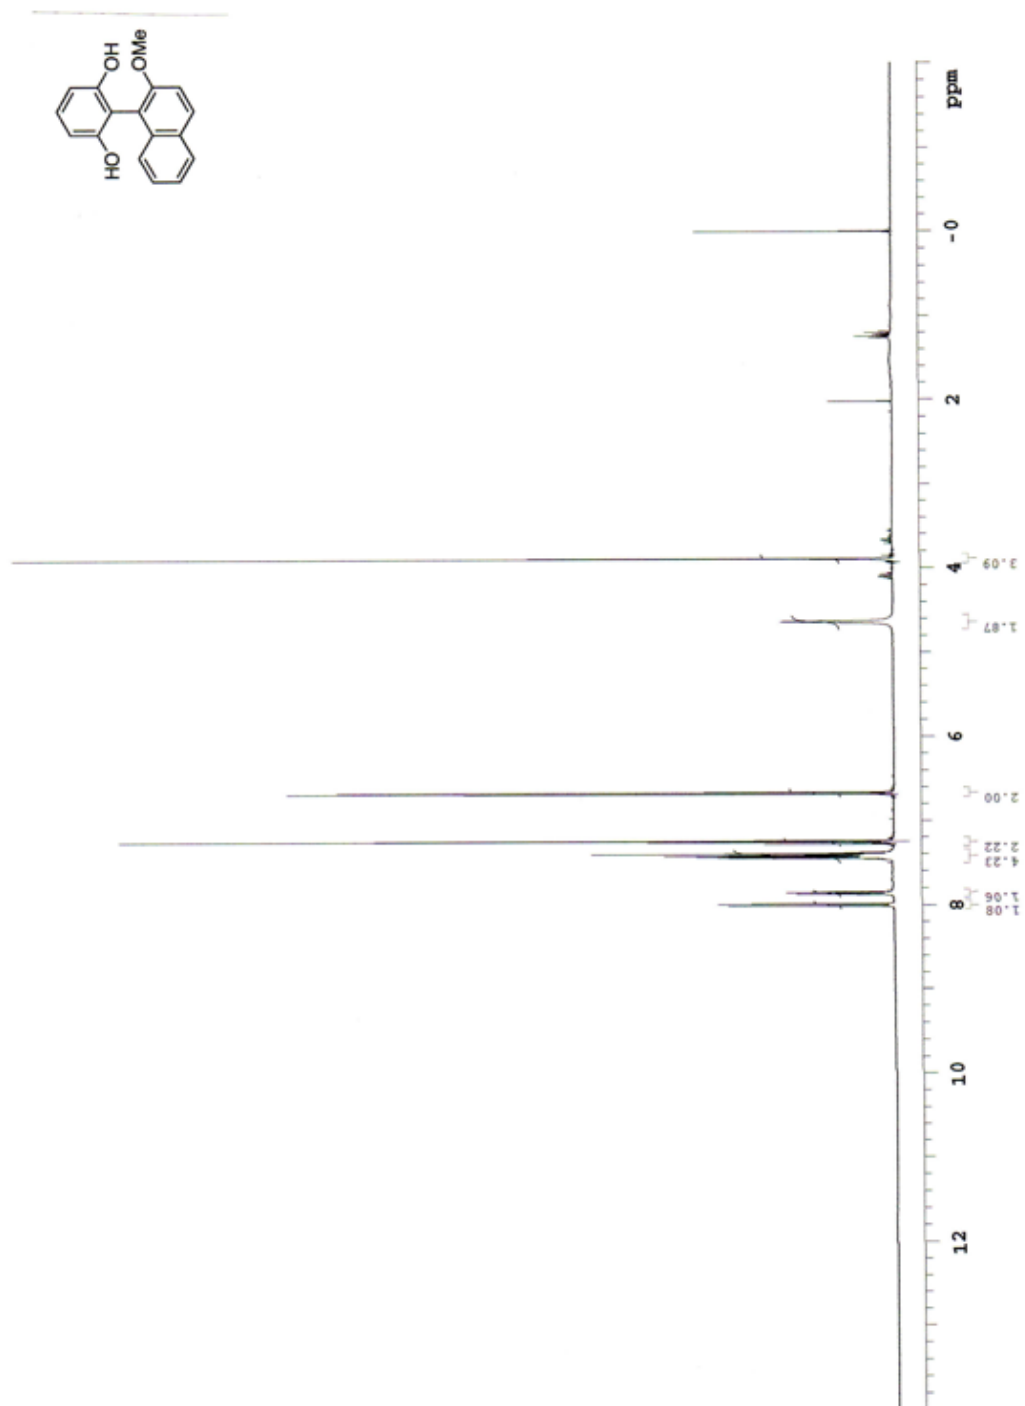

$^{13}\text{C}$  NMR spectrum of **30**.

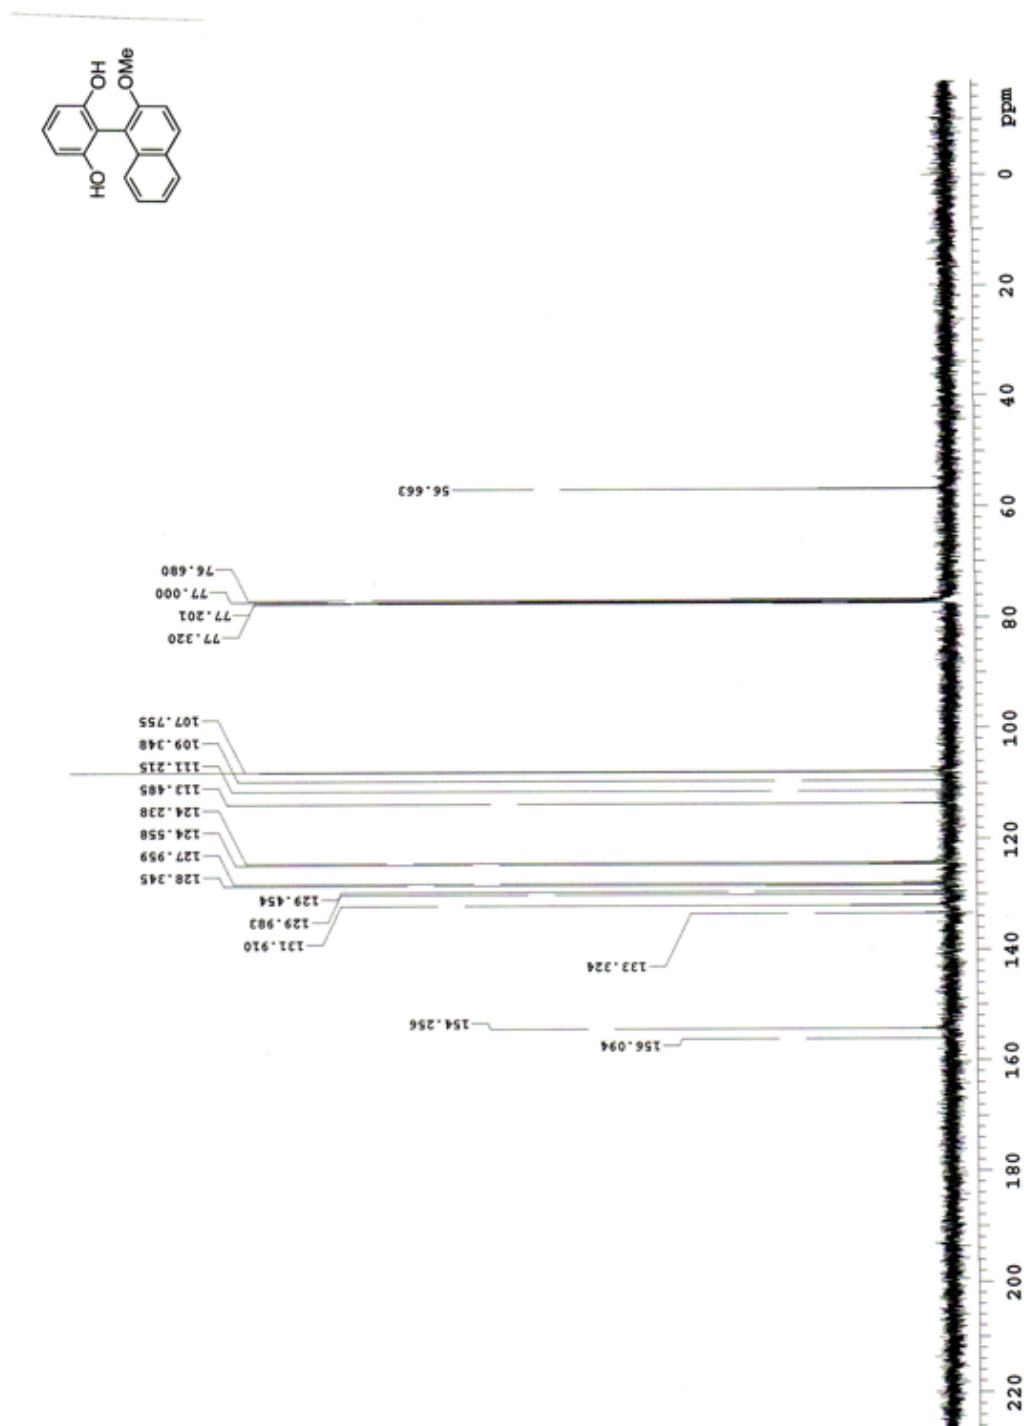



$^1\text{H}$  NMR spectrum of **s23**.

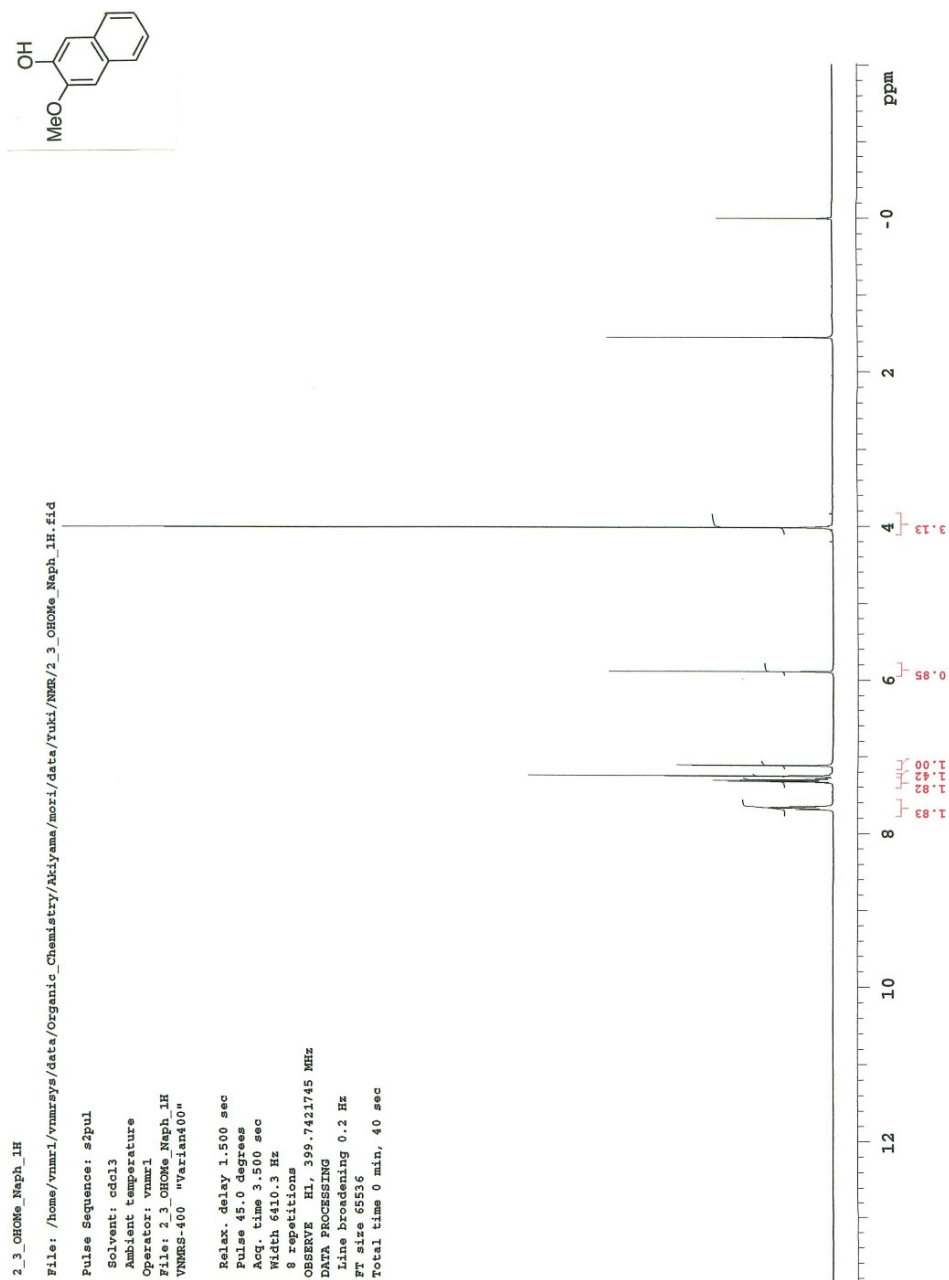

<sup>13</sup>C NMR spectrum of **s23**.

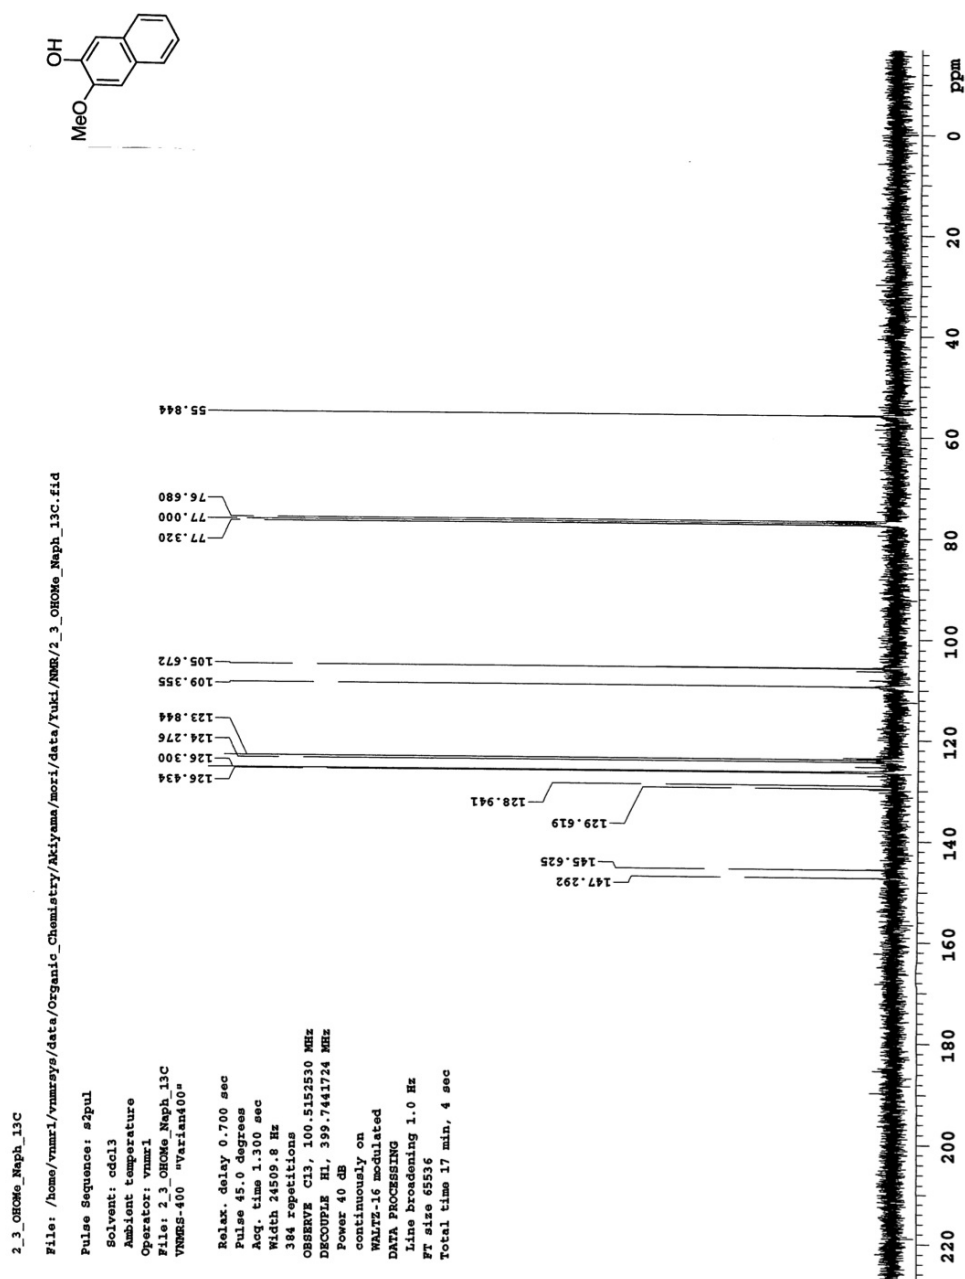

$^1\text{H}$  NMR spectrum of **s25**.

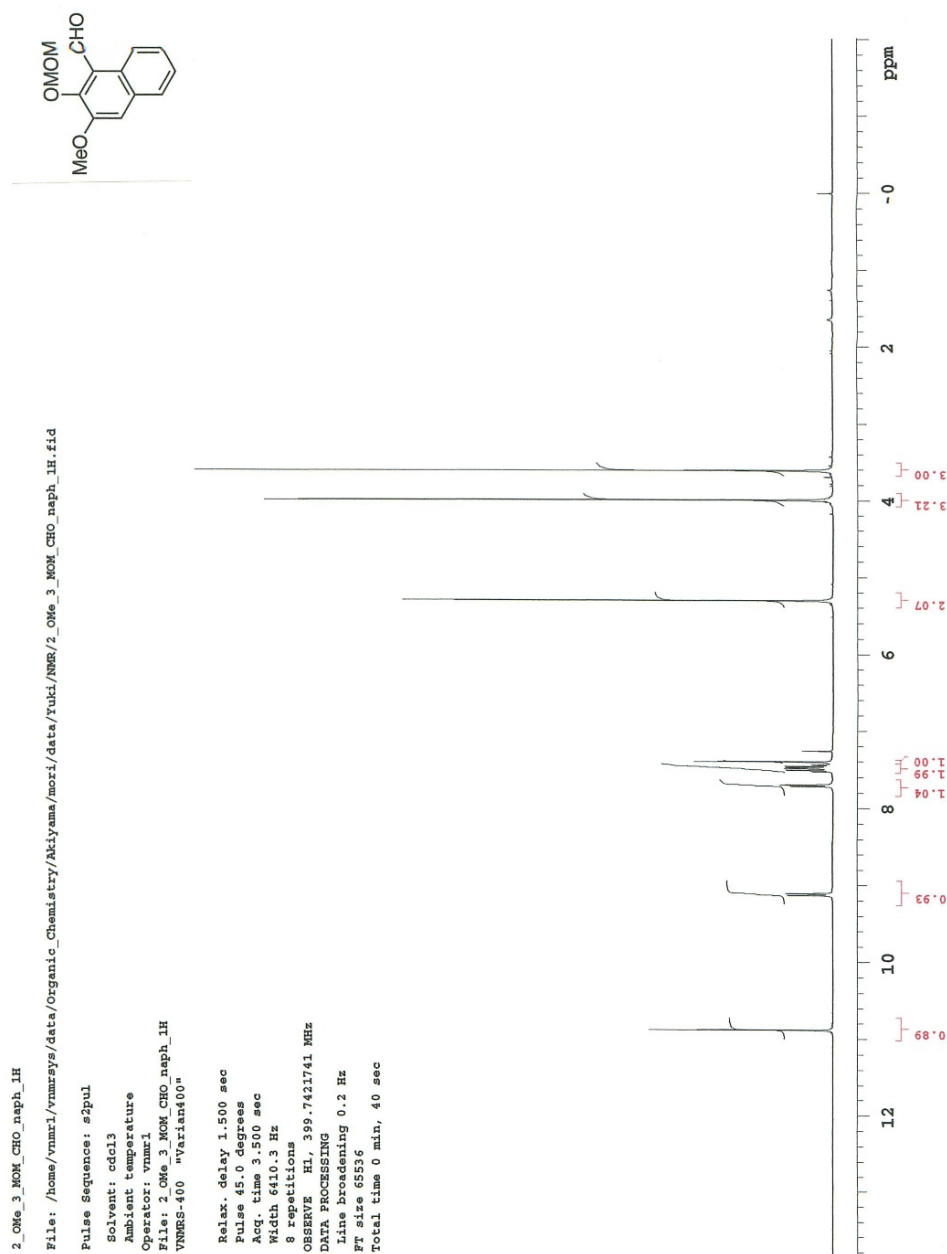

<sup>13</sup>C NMR spectrum of **s25**.

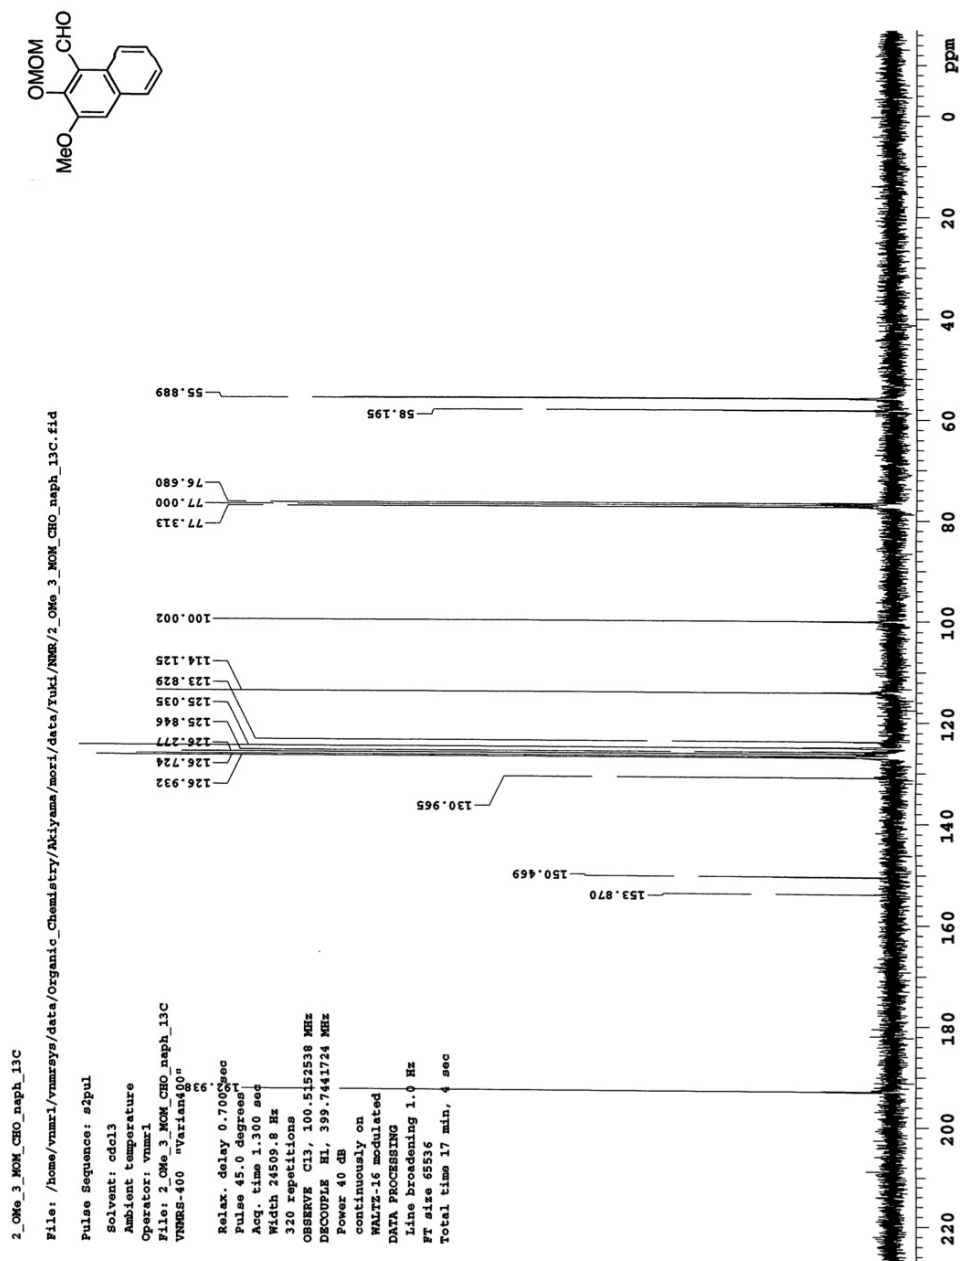

$^1\text{H}$  NMR spectrum of **s28**.

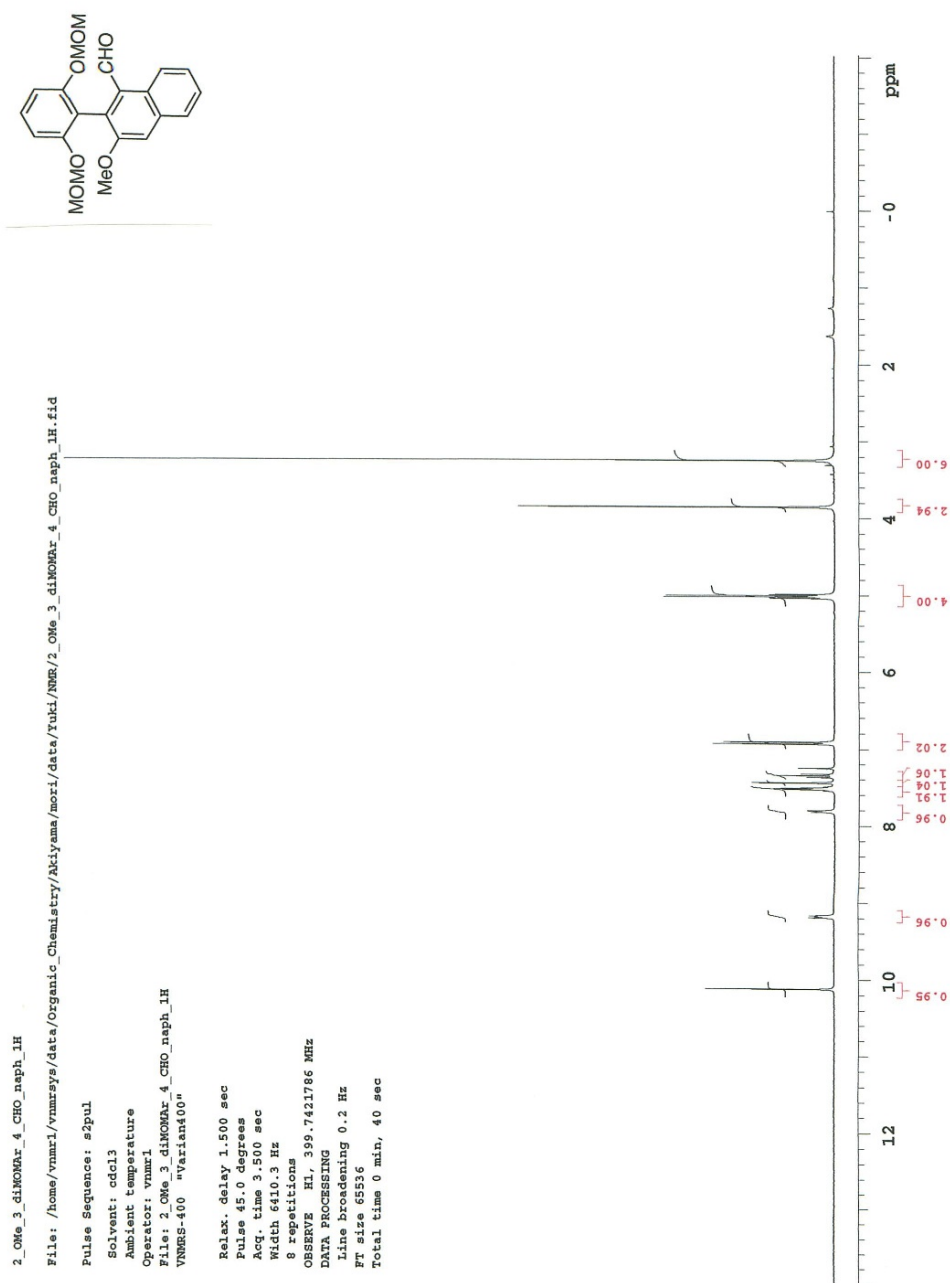

<sup>13</sup>C NMR spectrum of **s28**.

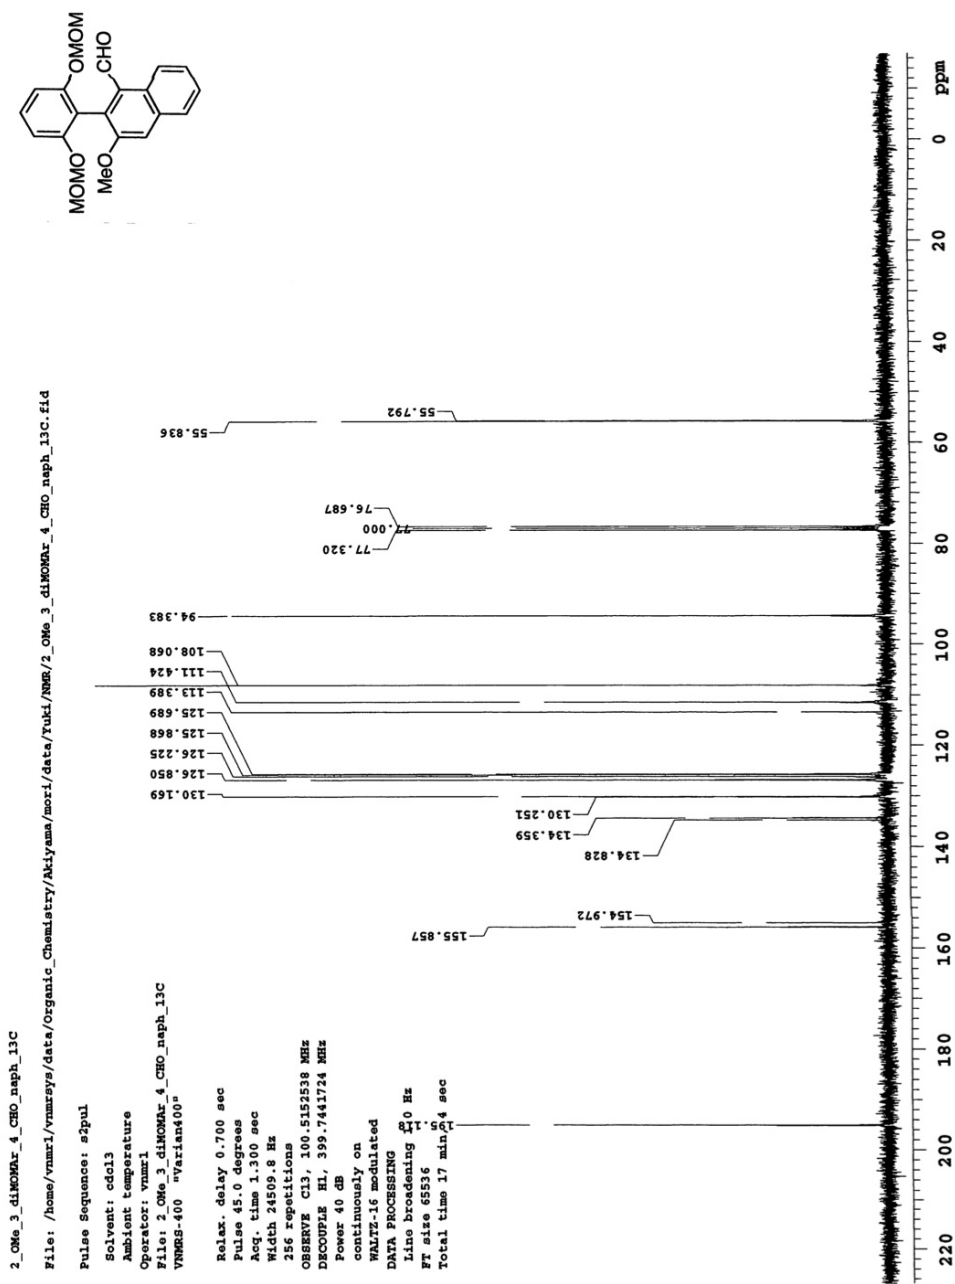

$^1\text{H}$  NMR spectrum of **3p**.

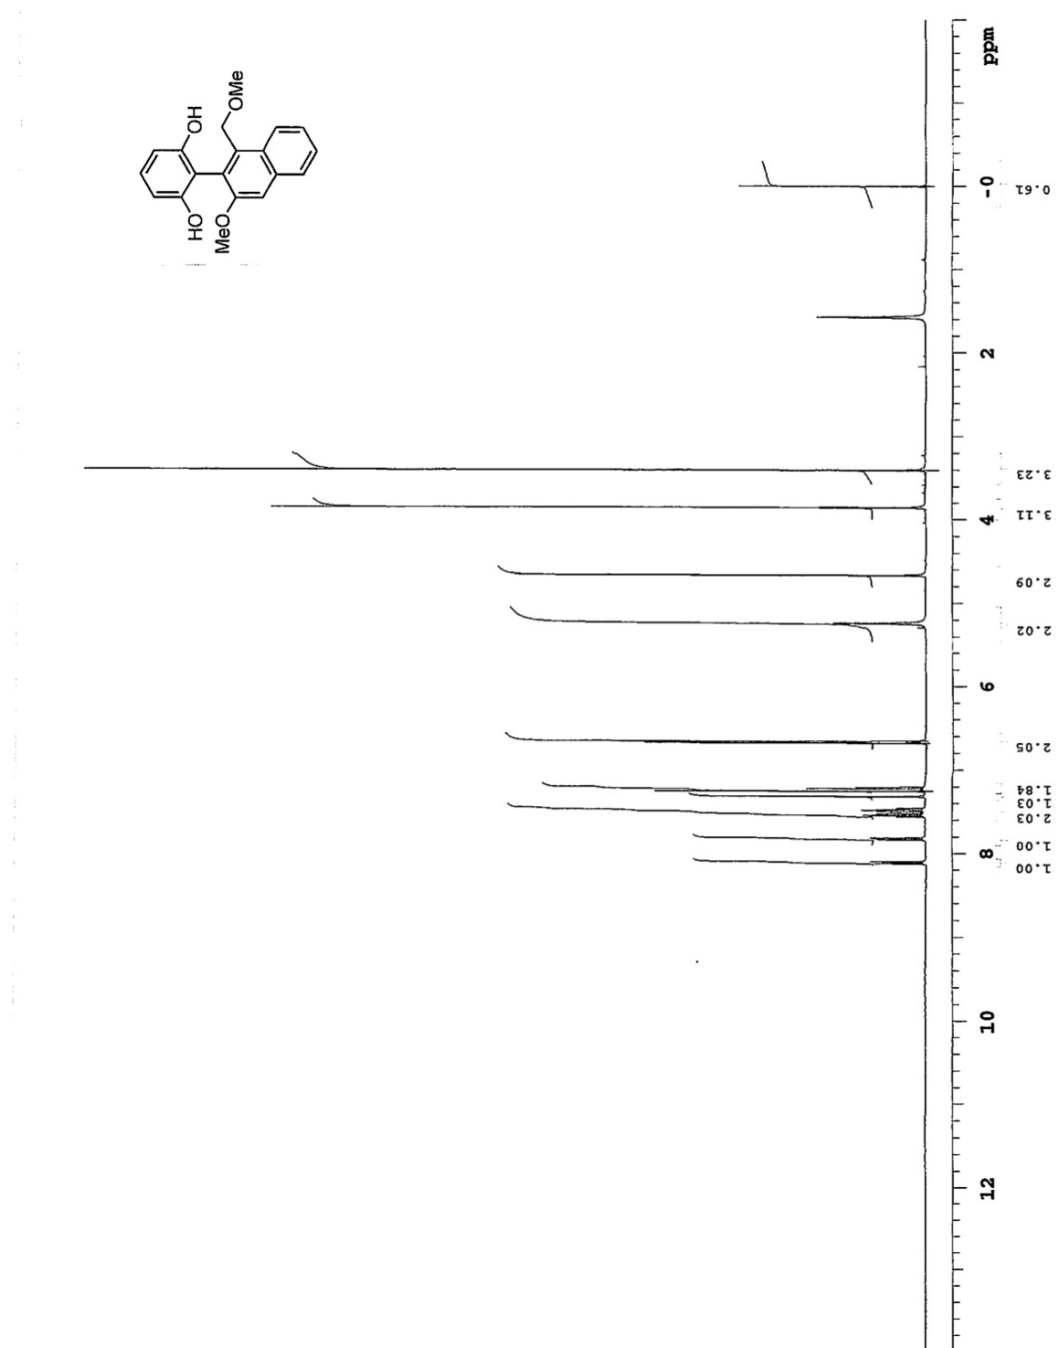

$^{13}\text{C}$  NMR spectrum of **3p**.

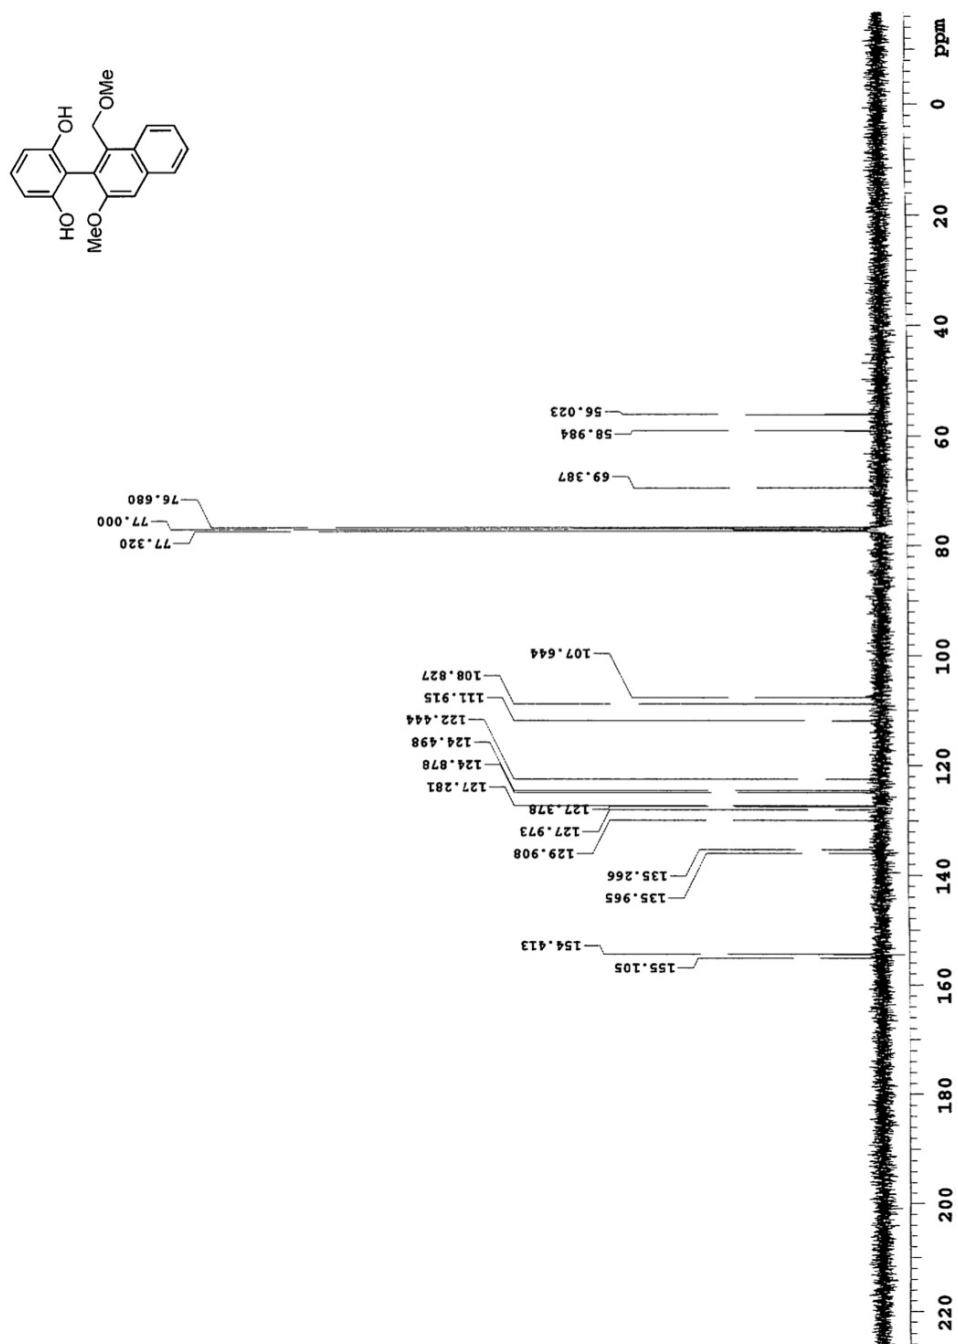



$^1\text{H}$  NMR spectrum of **s34**.

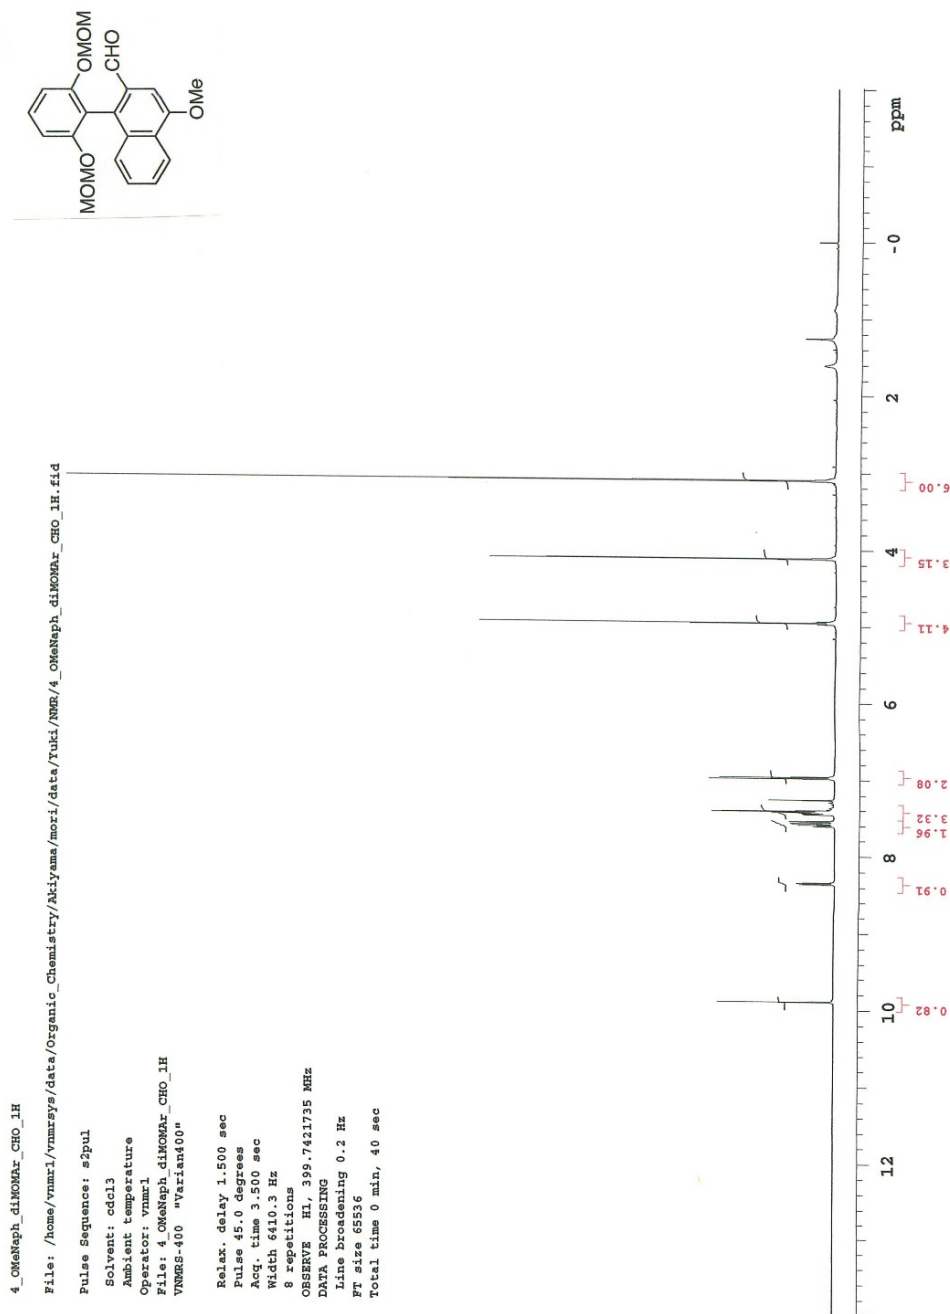

<sup>13</sup>C NMR spectrum of **s34**.

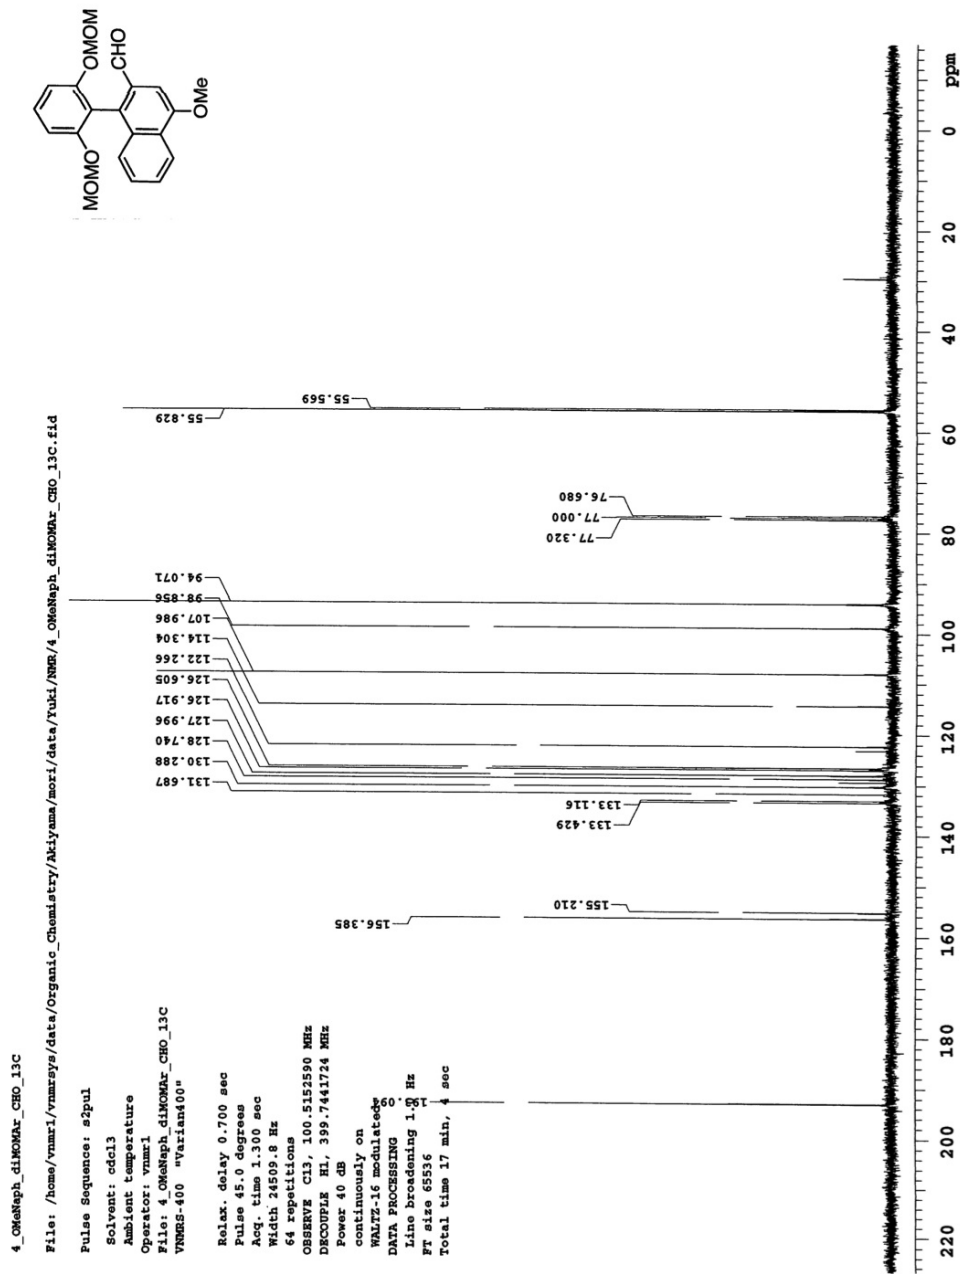

$^1\text{H}$  NMR spectrum of **3r**.

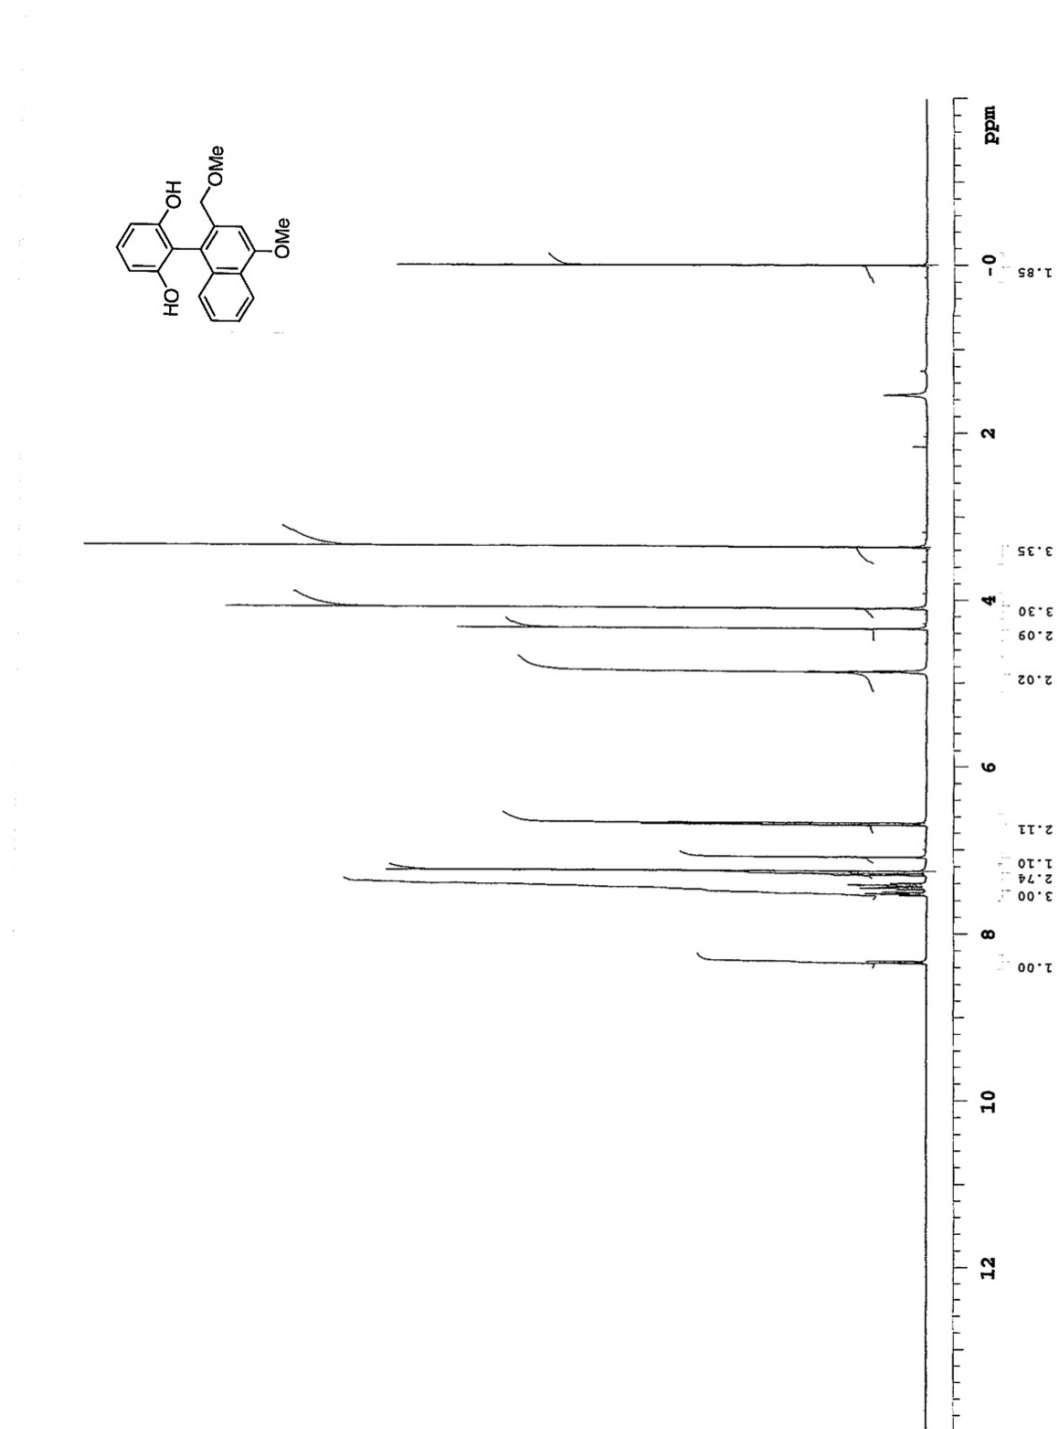

$^{13}\text{C}$  NMR spectrum of **3r**.

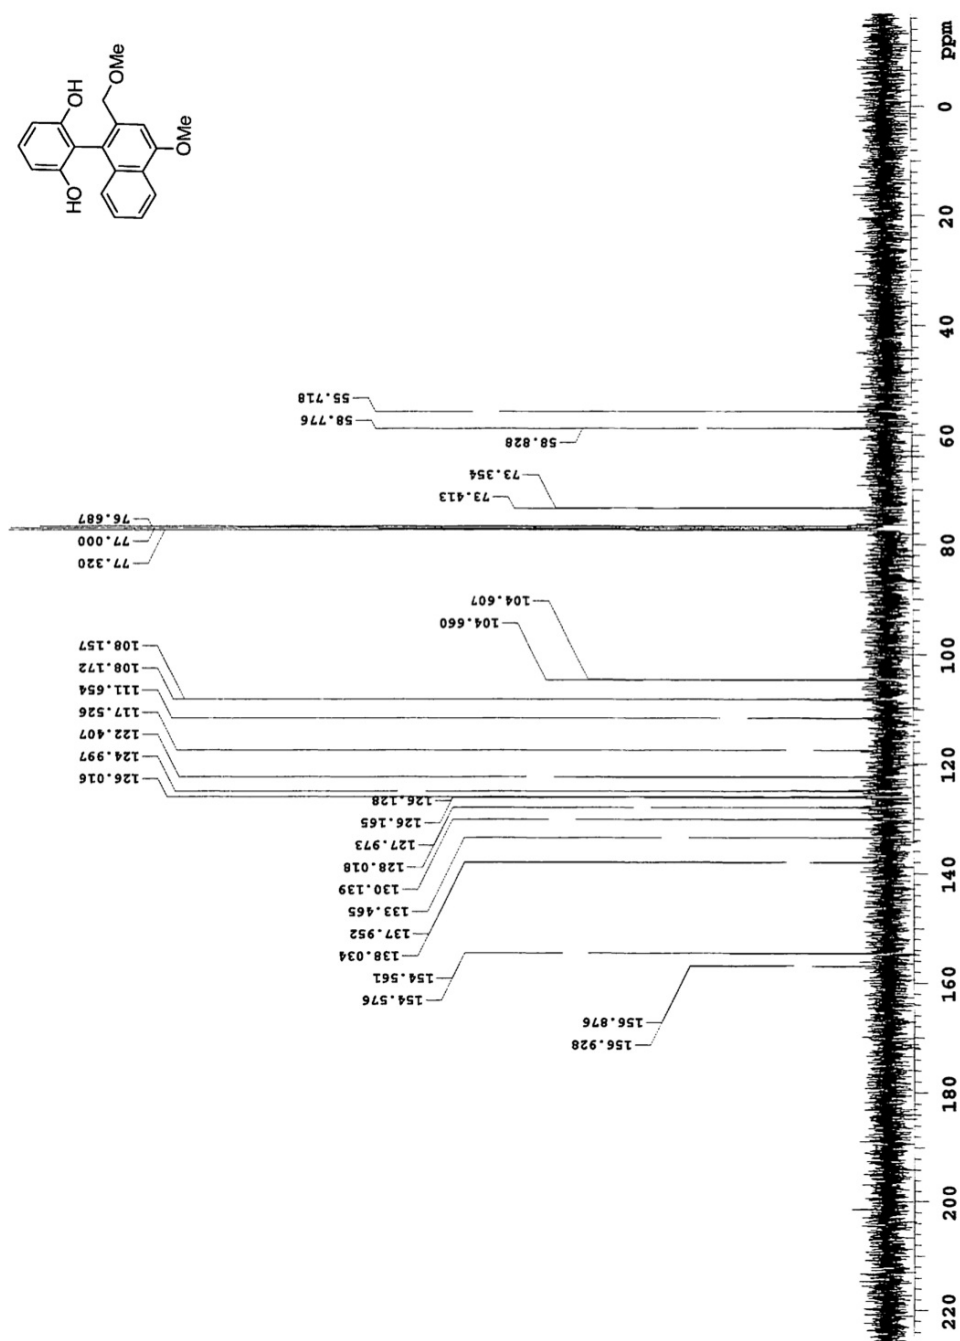

$^1\text{H}$  NMR spectrum of **s37**.

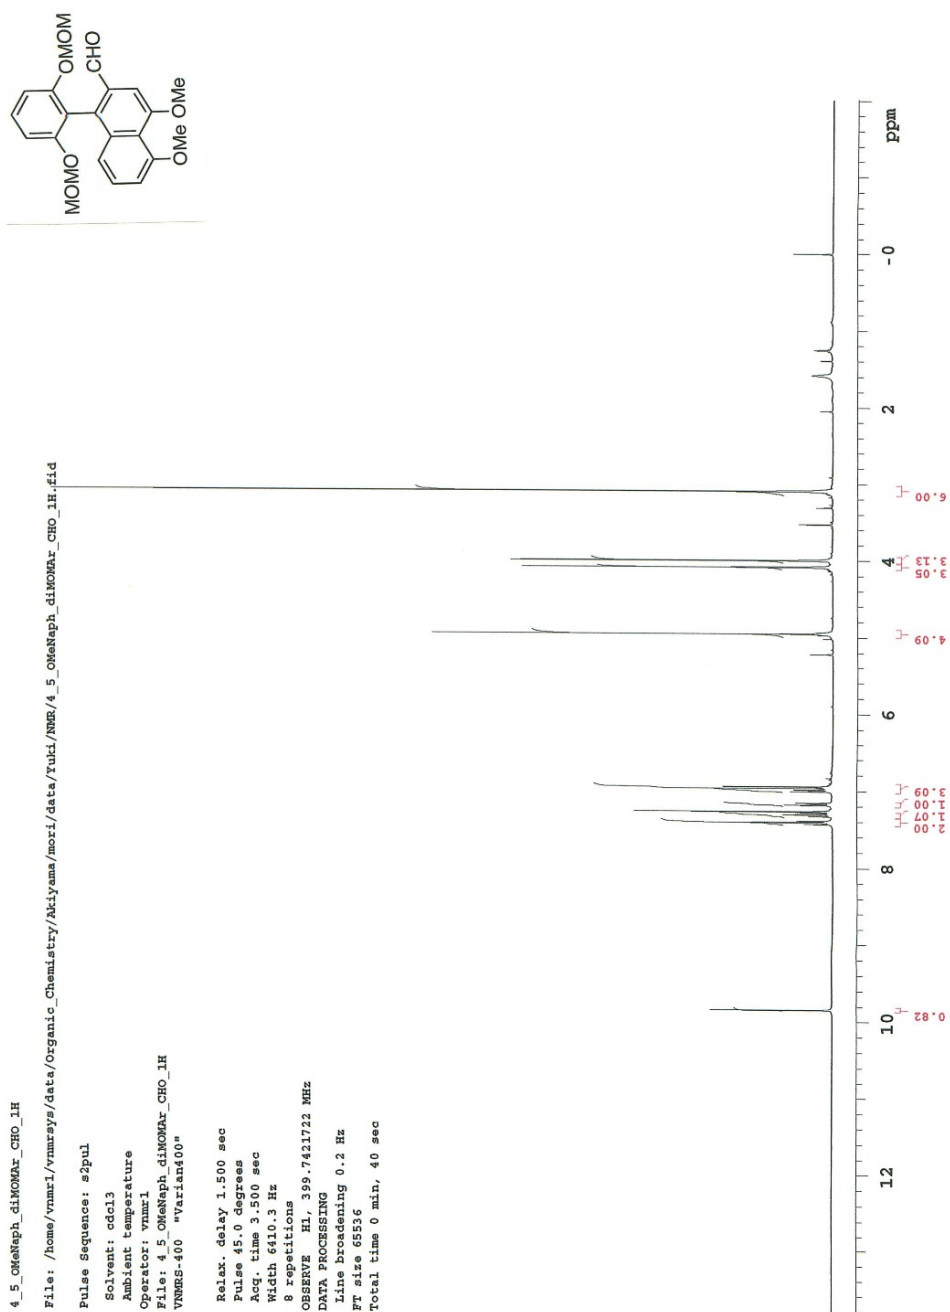

<sup>13</sup>C NMR spectrum of **s37**.

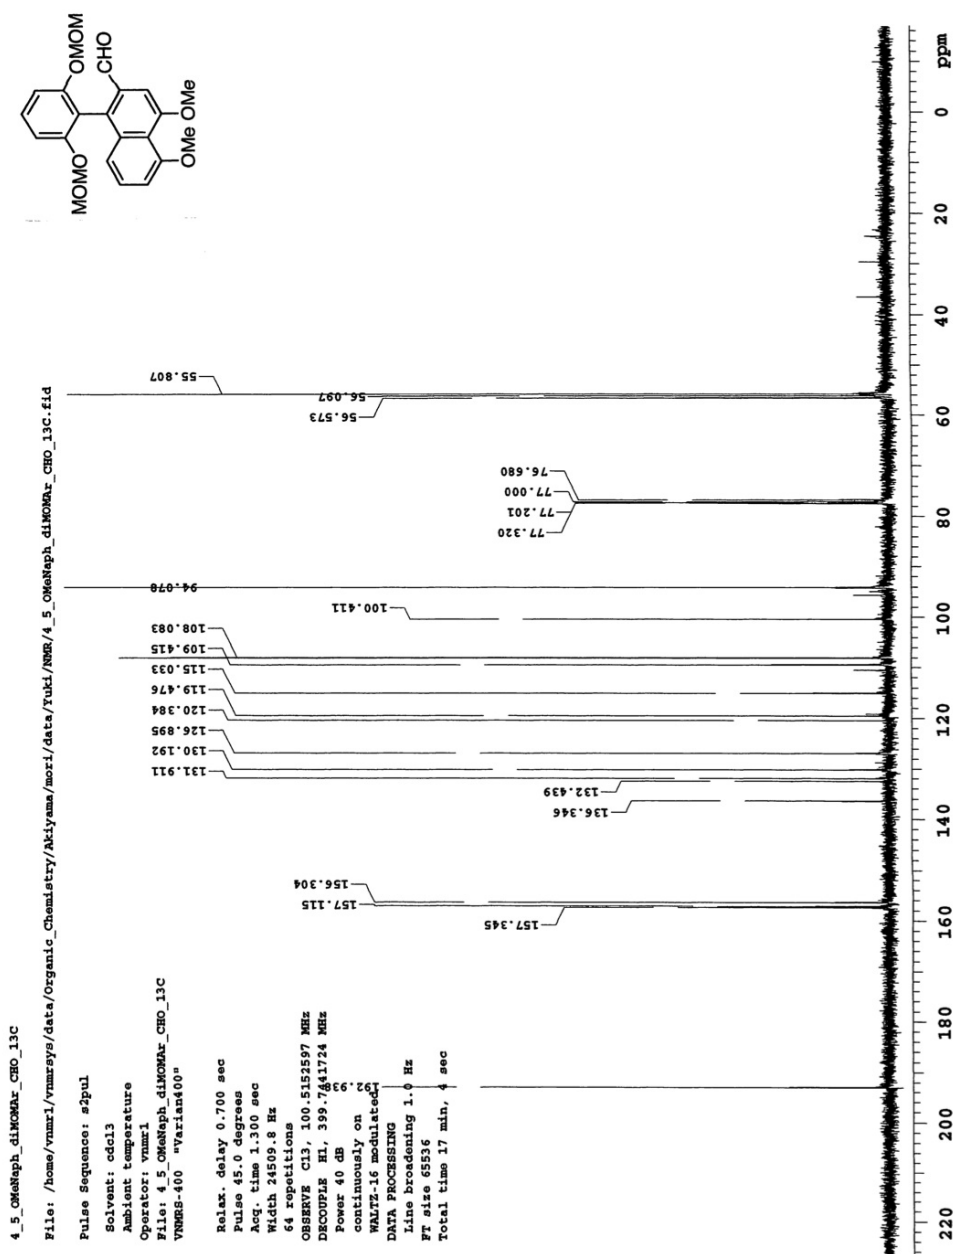

$^1\text{H}$  NMR spectrum of **3t**.

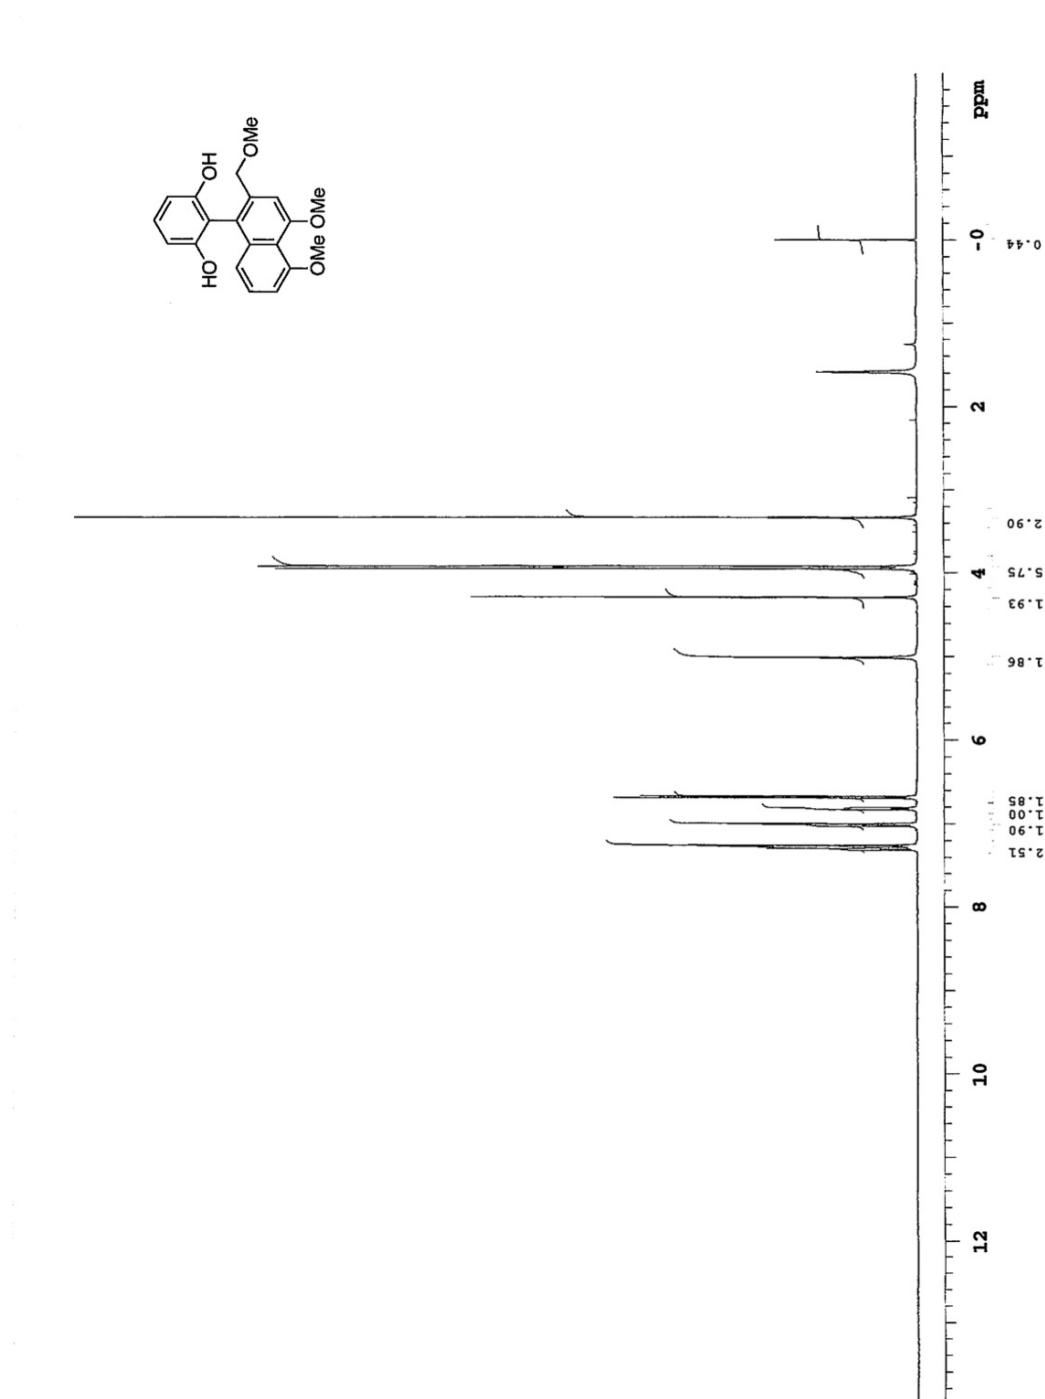

$^{13}\text{C}$  NMR spectrum of **3t**.

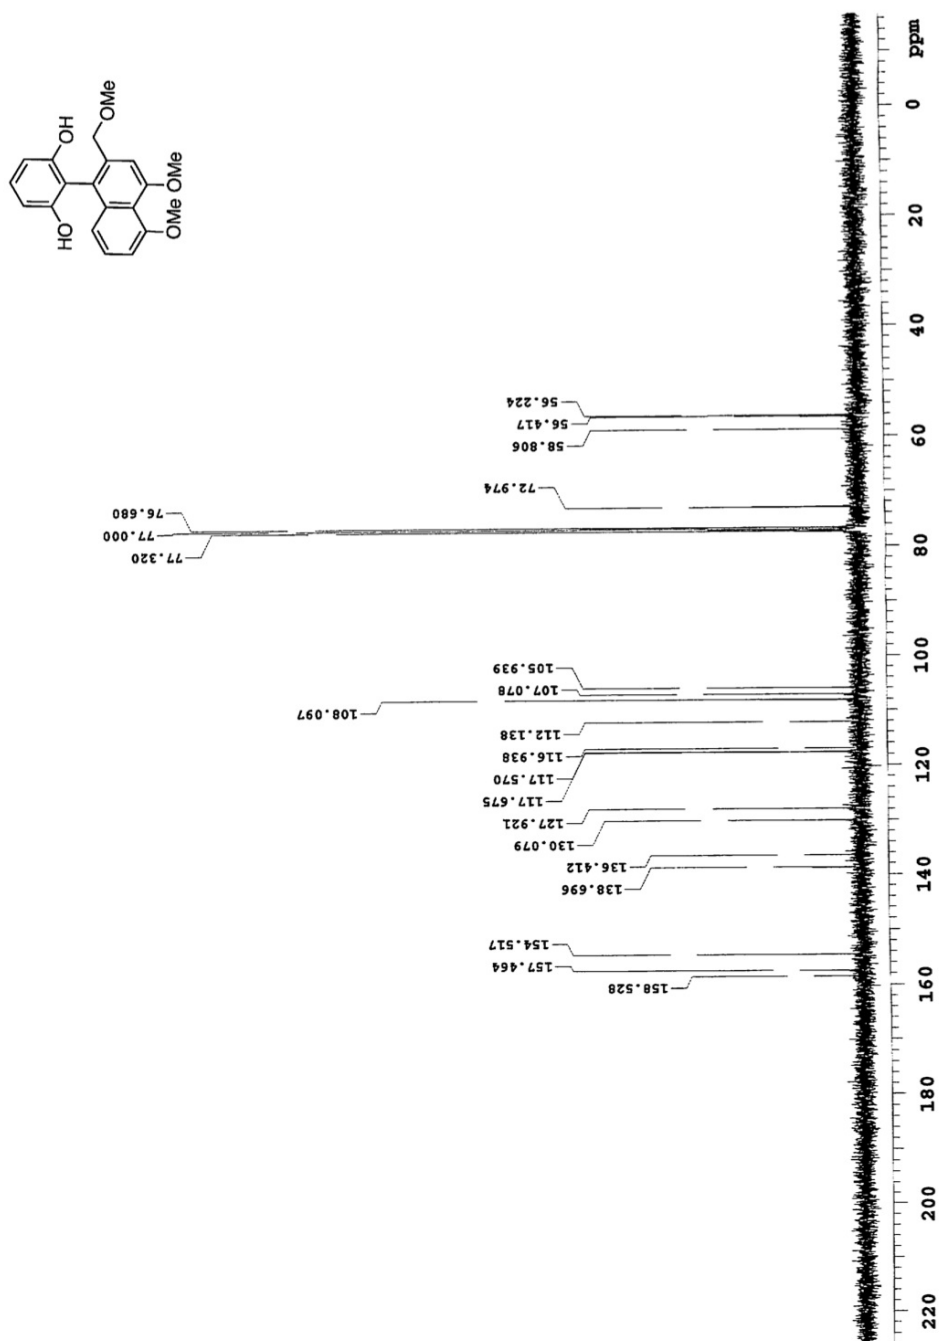



$^1\text{H}$  NMR spectrum of **s40**.

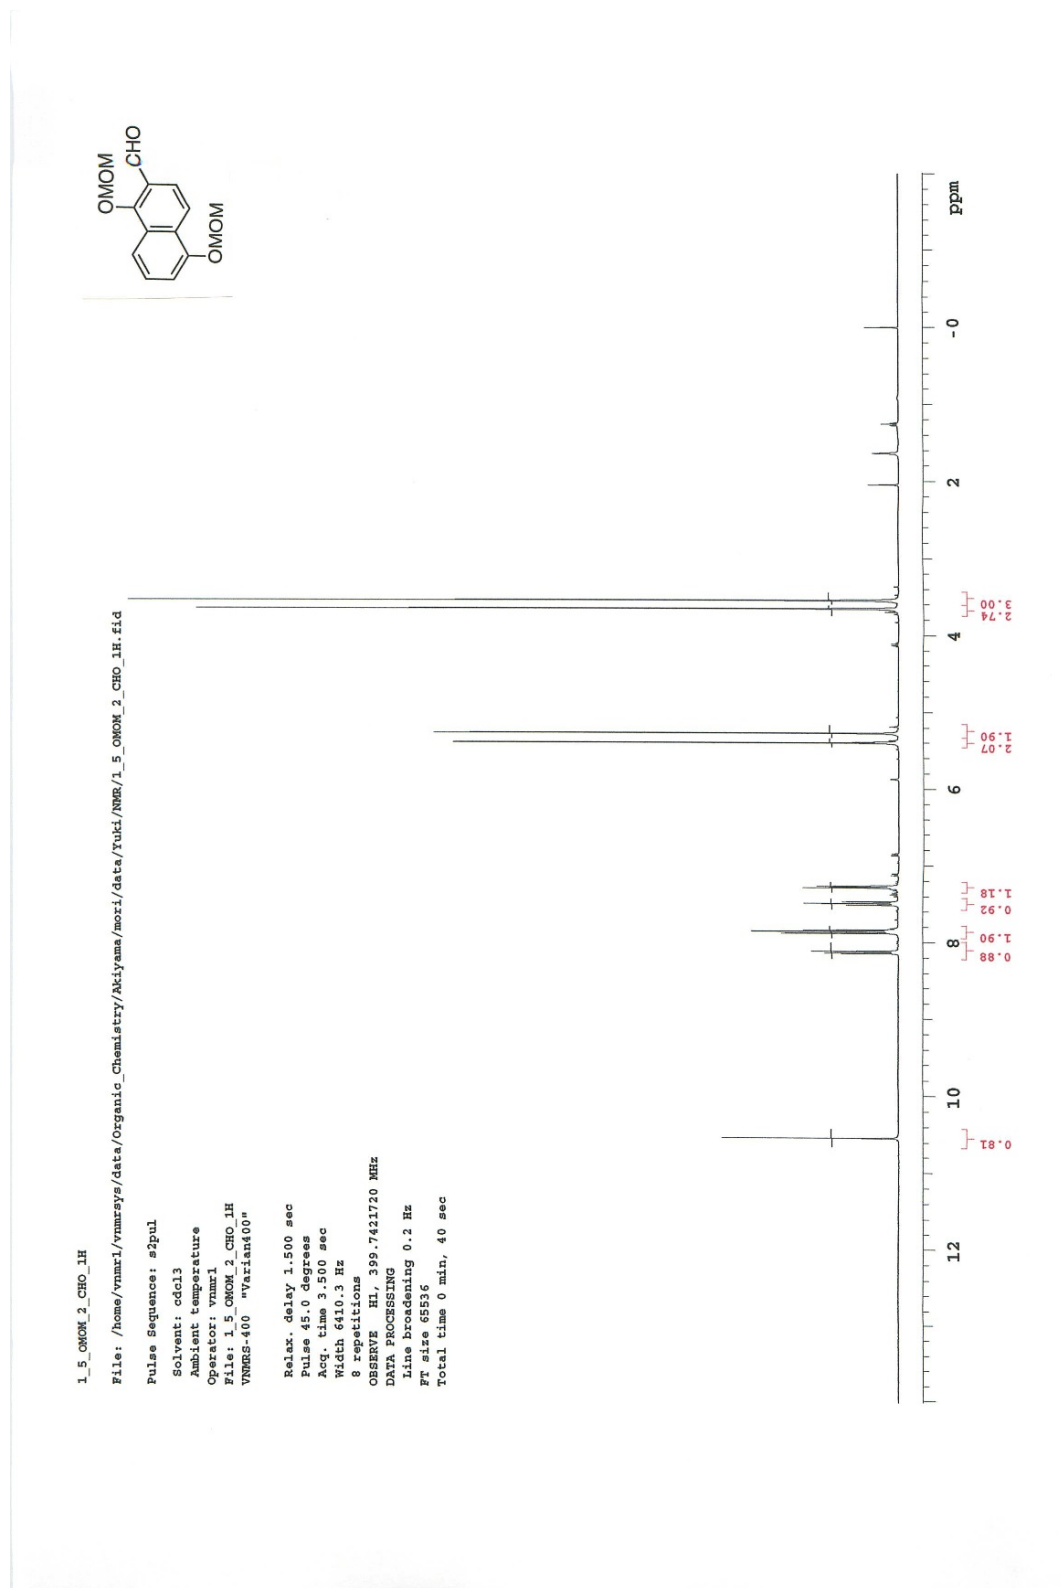

<sup>13</sup>C NMR spectrum of **s40**.

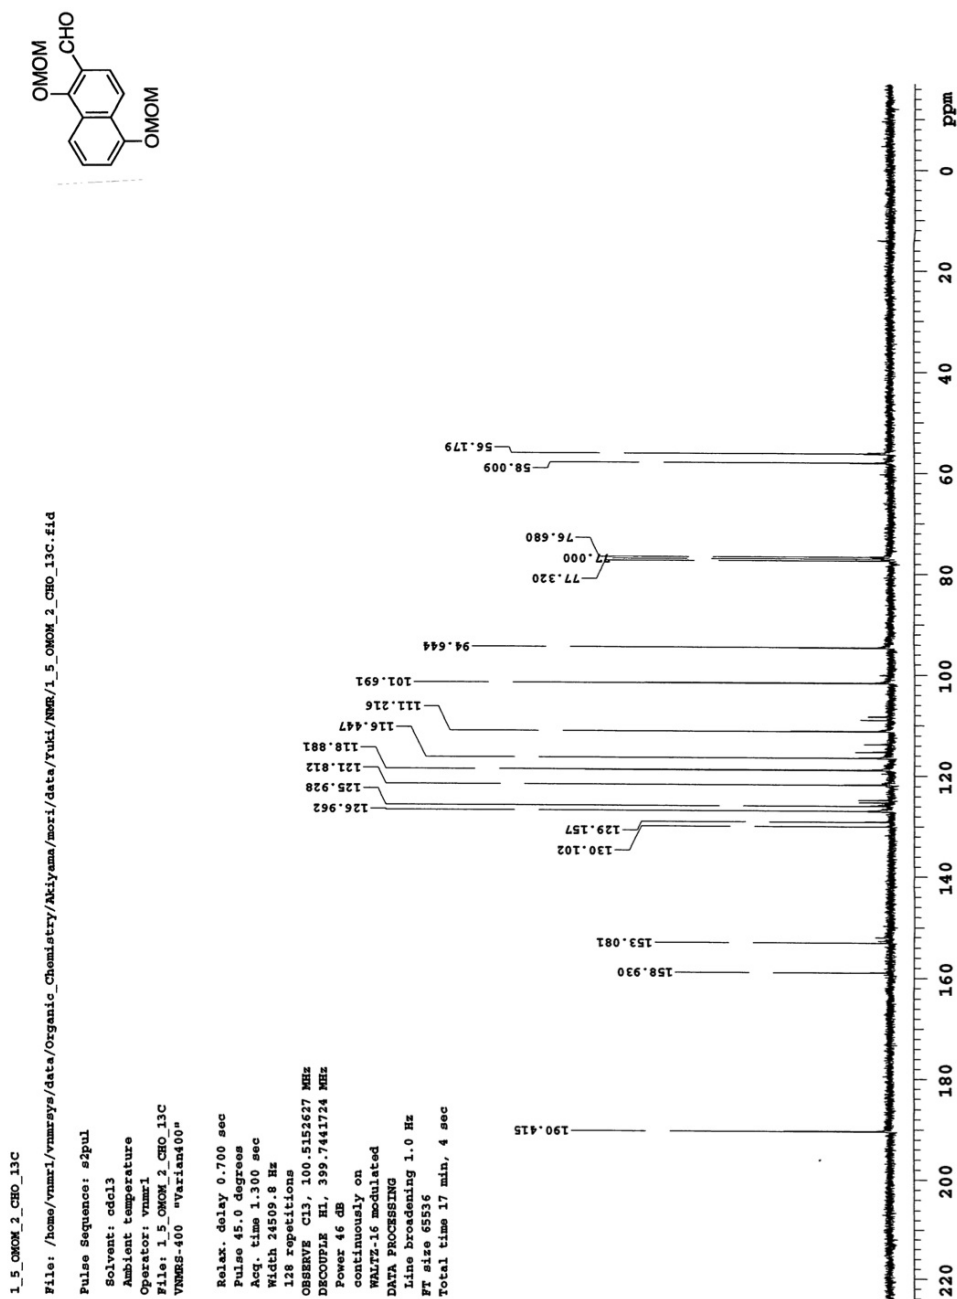

$^1\text{H}$  NMR spectrum of **s45**.

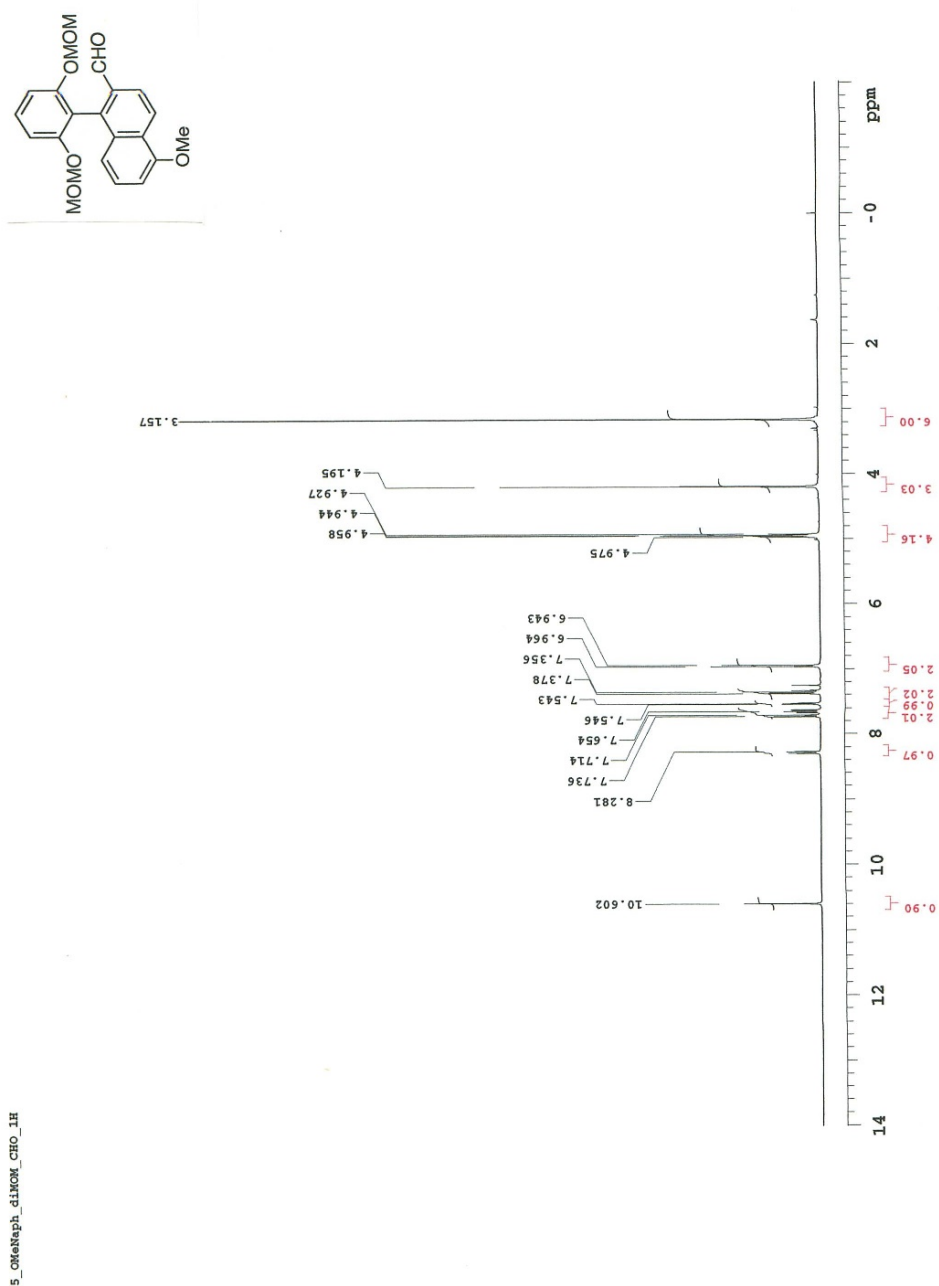

<sup>13</sup>C NMR spectrum of **s45**.

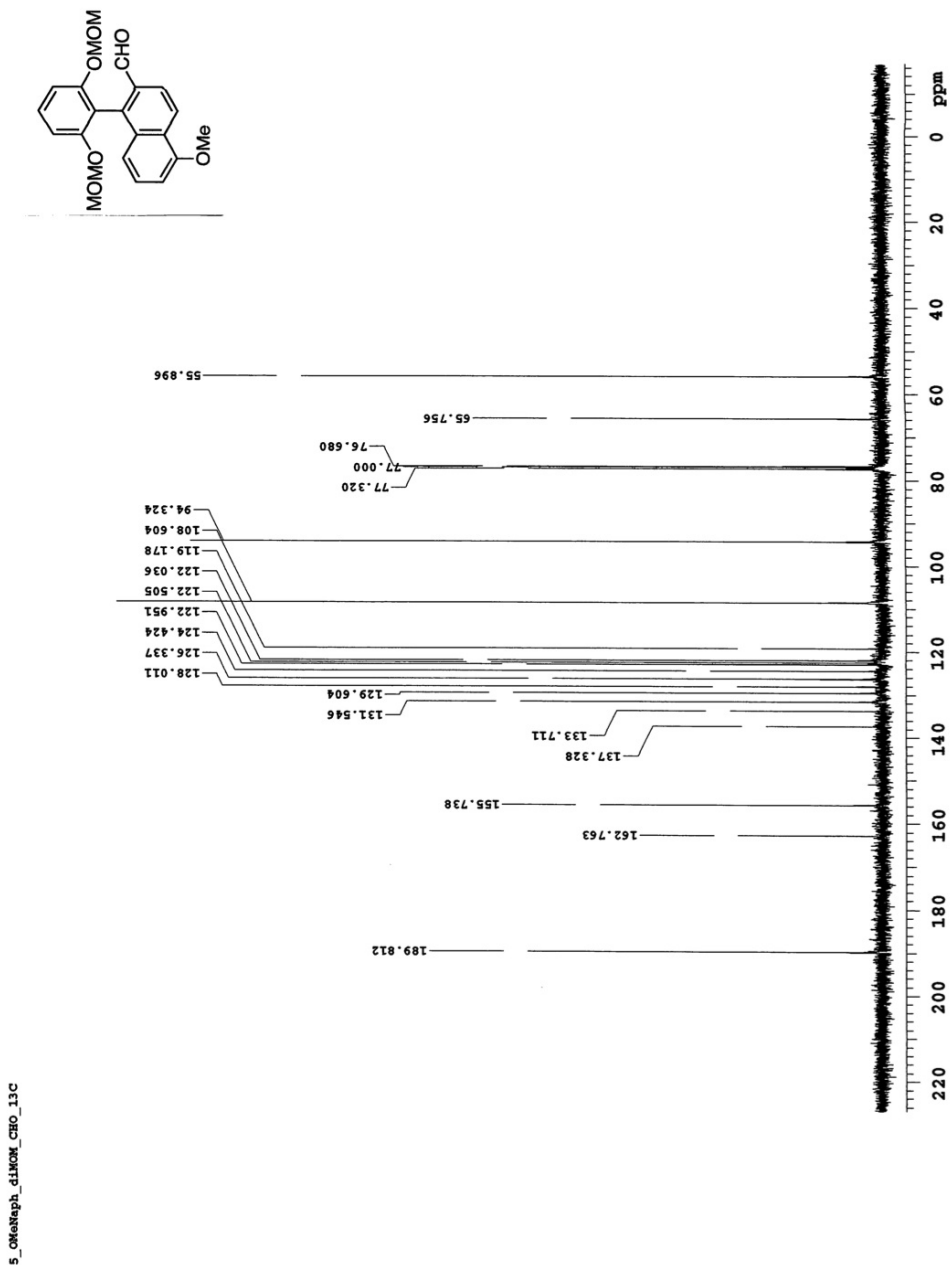

$^1\text{H}$  NMR spectrum of **3s**.

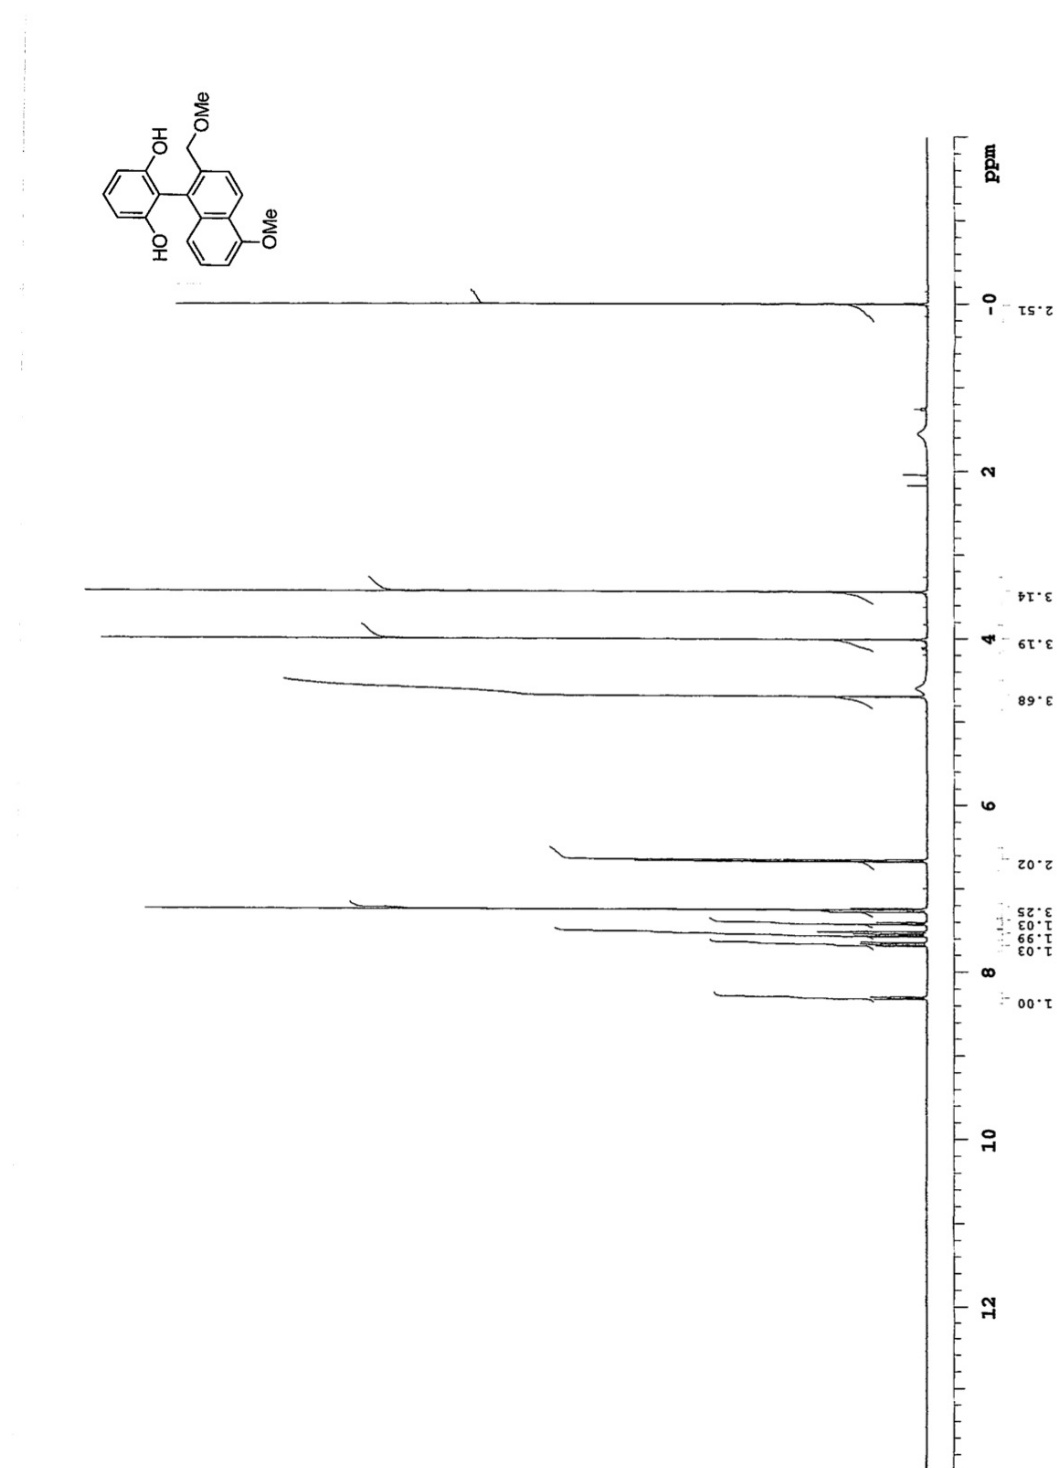

$^{13}\text{C}$  NMR spectrum of **3s**.

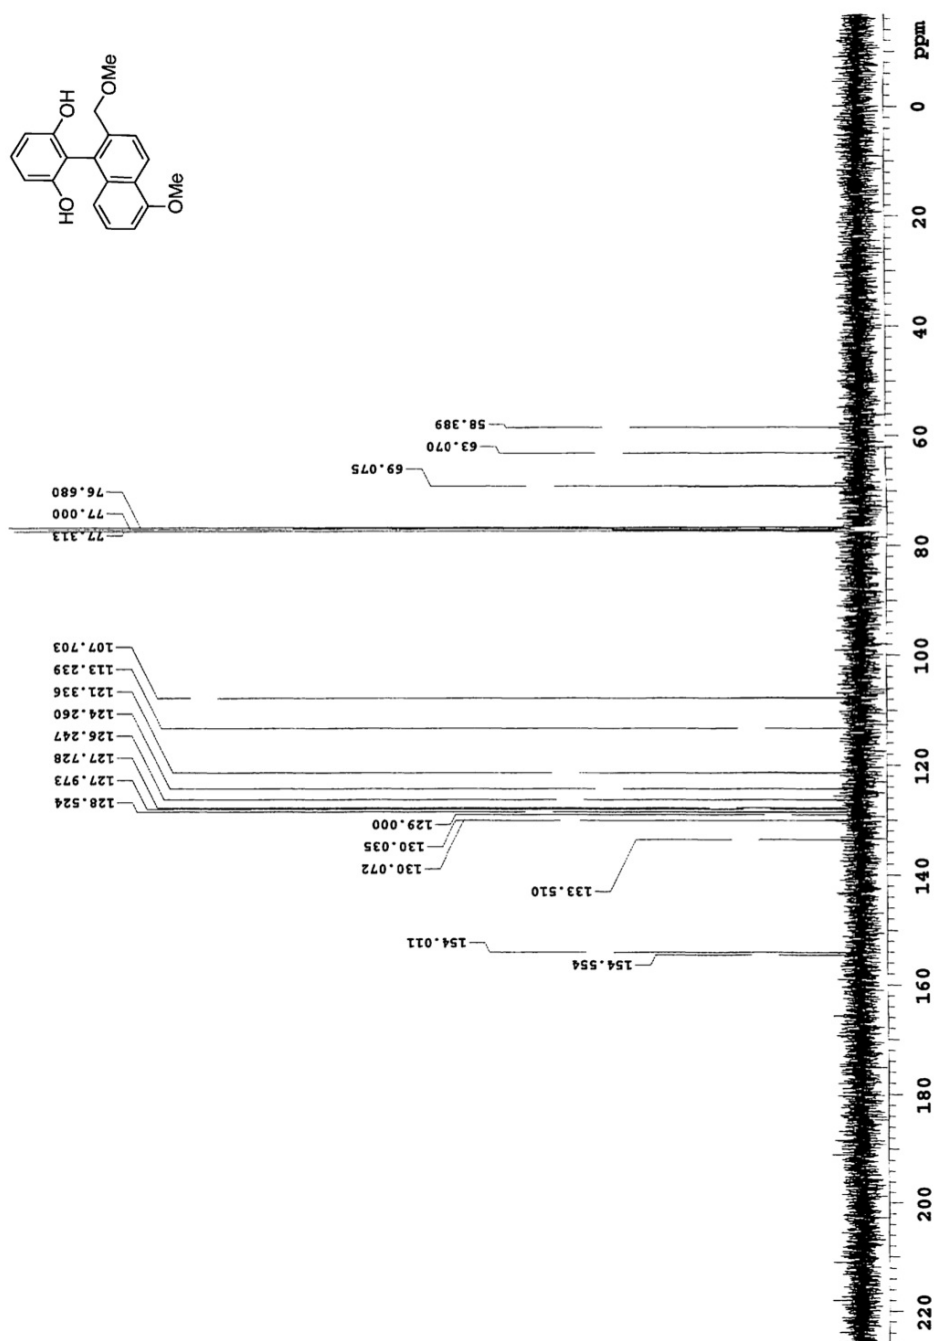

$^1\text{H}$  NMR spectrum of **4n**.

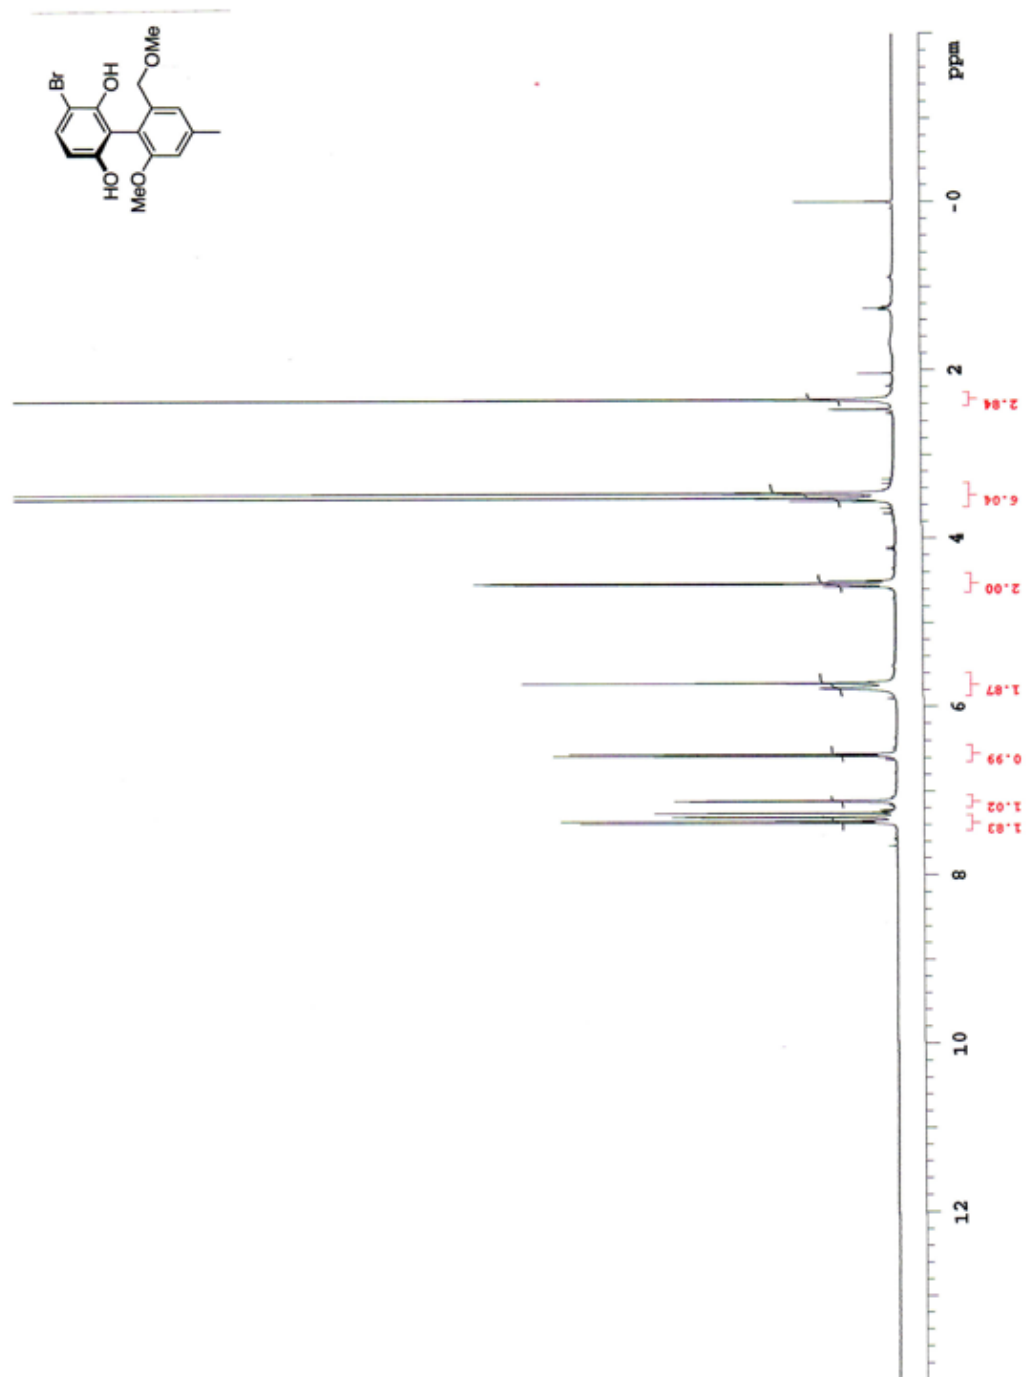

$^{13}\text{C}$  NMR spectrum of **4n**.

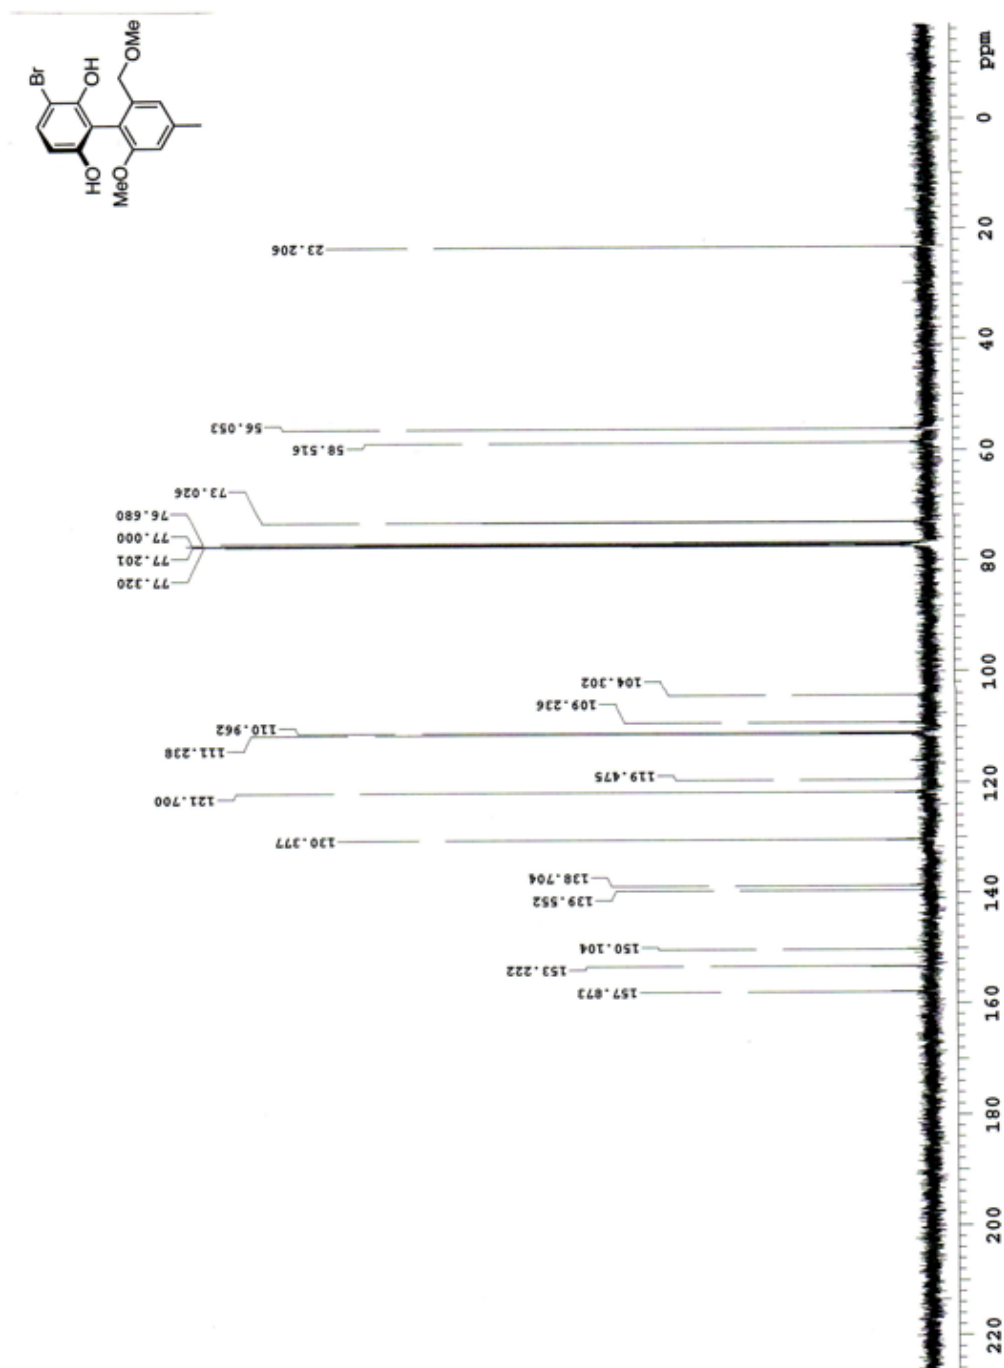



$^1\text{H}$  NMR spectrum of **s8**.

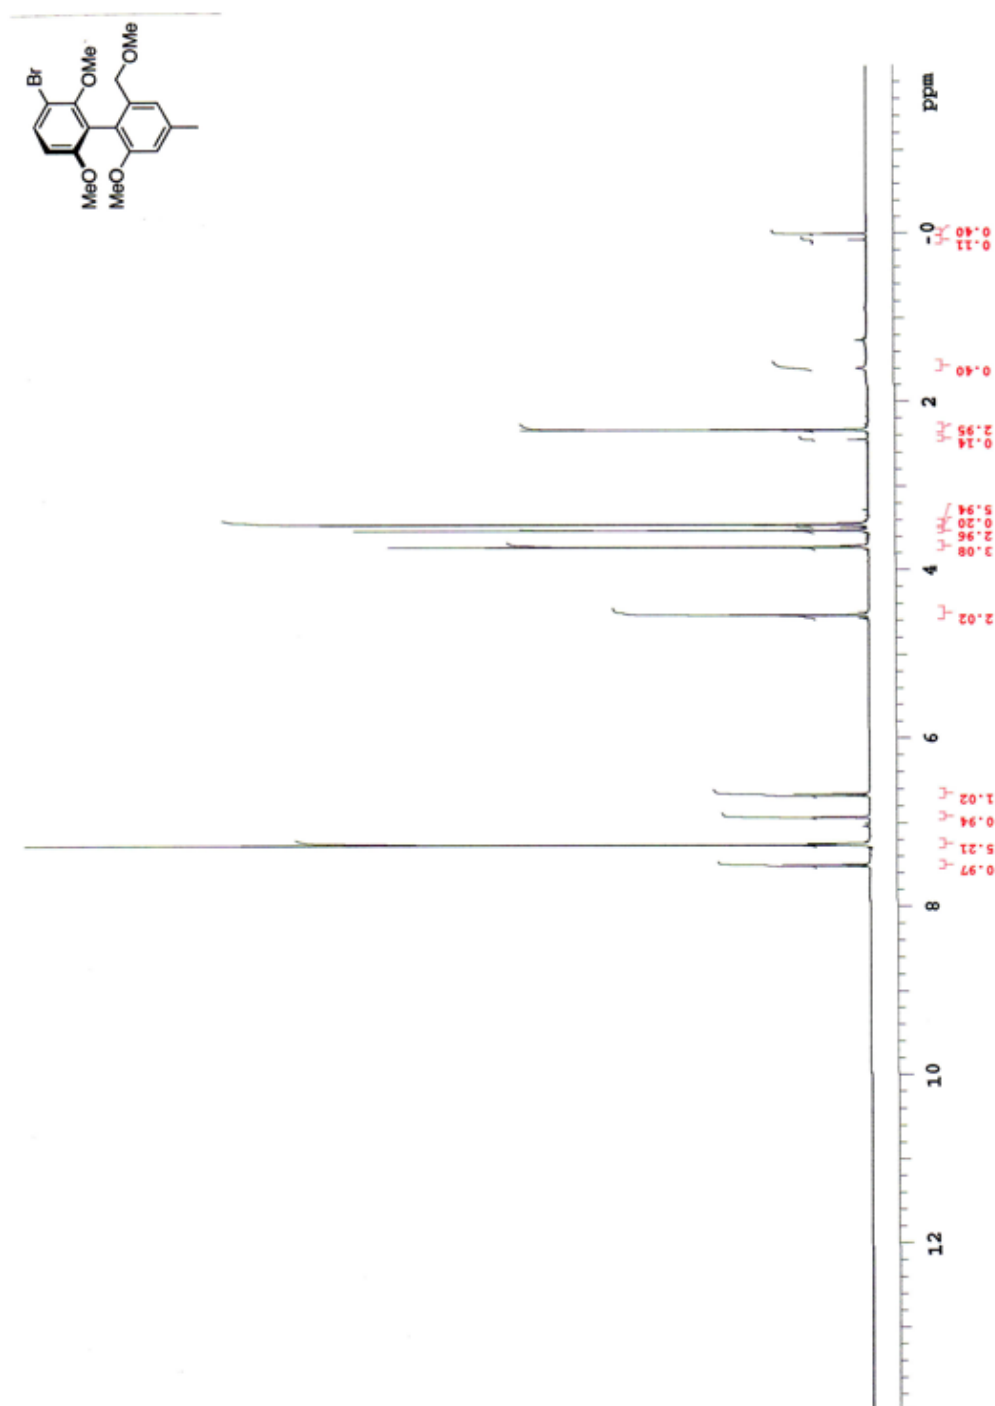

$^{13}\text{C}$  NMR spectrum of **s8**.

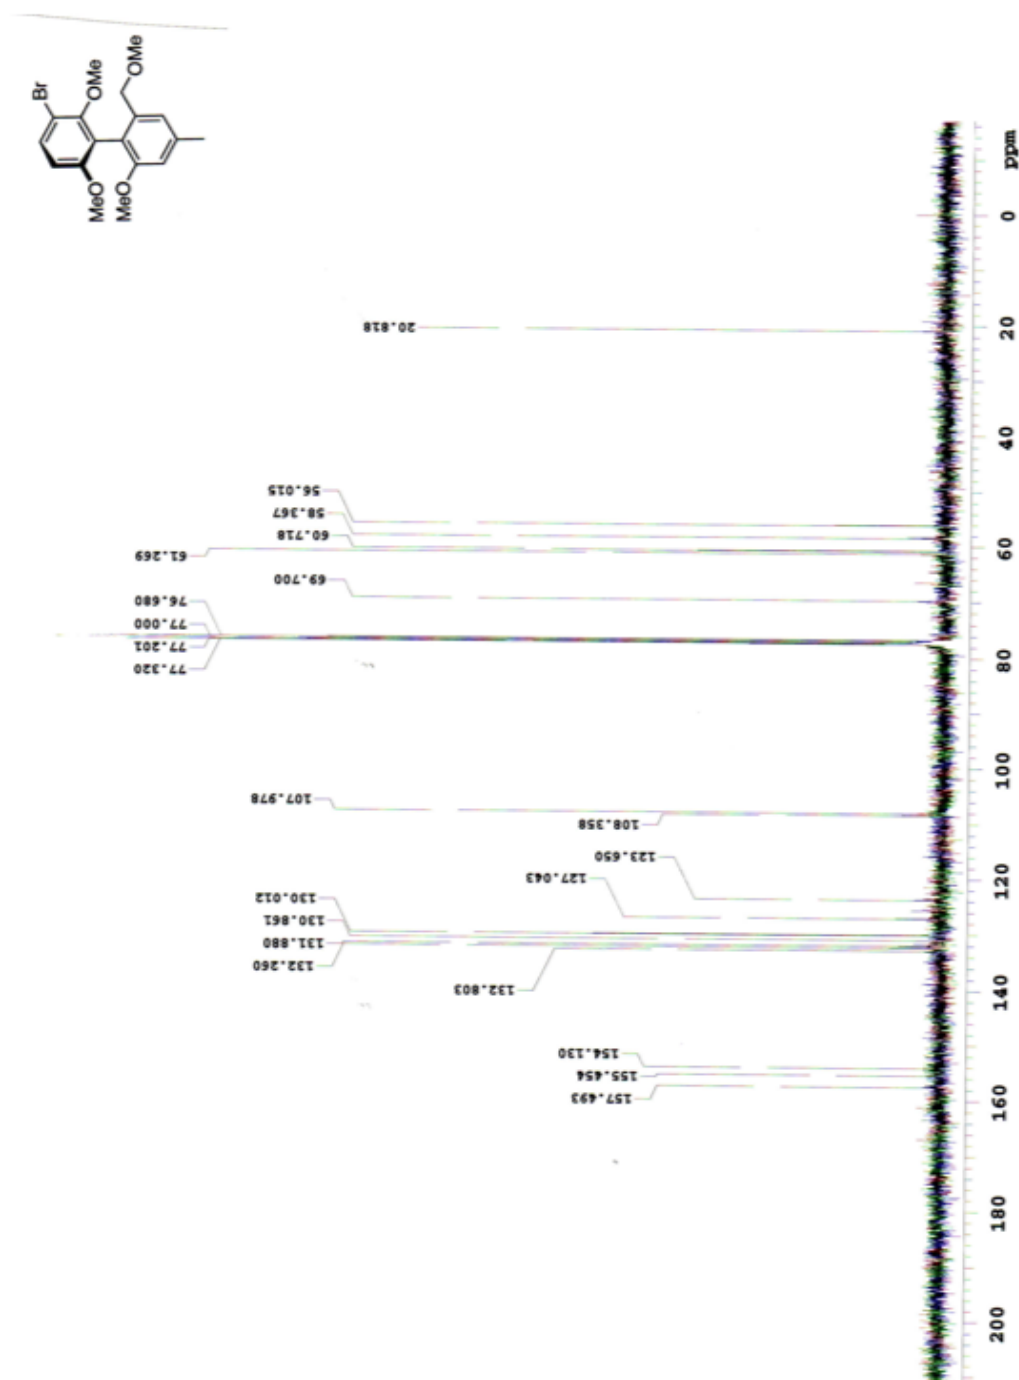

HPLC chart of **s8**.

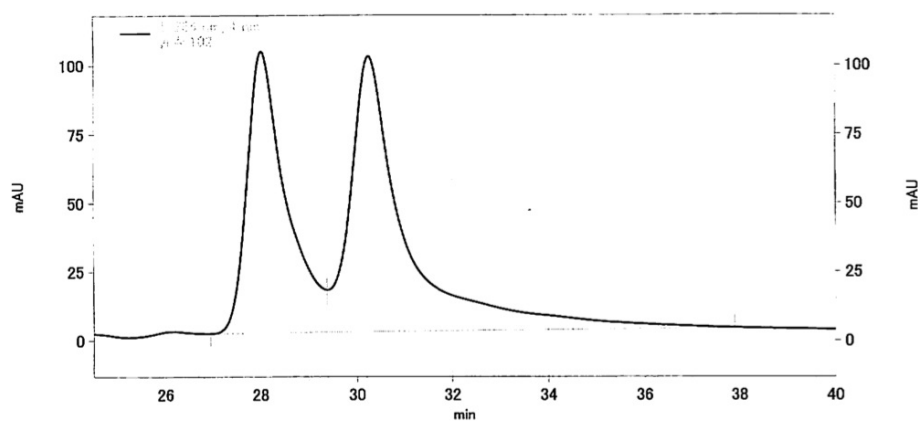

| Peak # | Retention time | Type | Area     | Area % |
|--------|----------------|------|----------|--------|
| 1      | 28.03          | BV   | 23198480 | 41.568 |
| 2      | 30.25          | VB   | 32610497 | 58.432 |

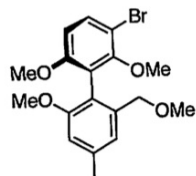

$^1\text{H}$  NMR spectrum of **4o**.

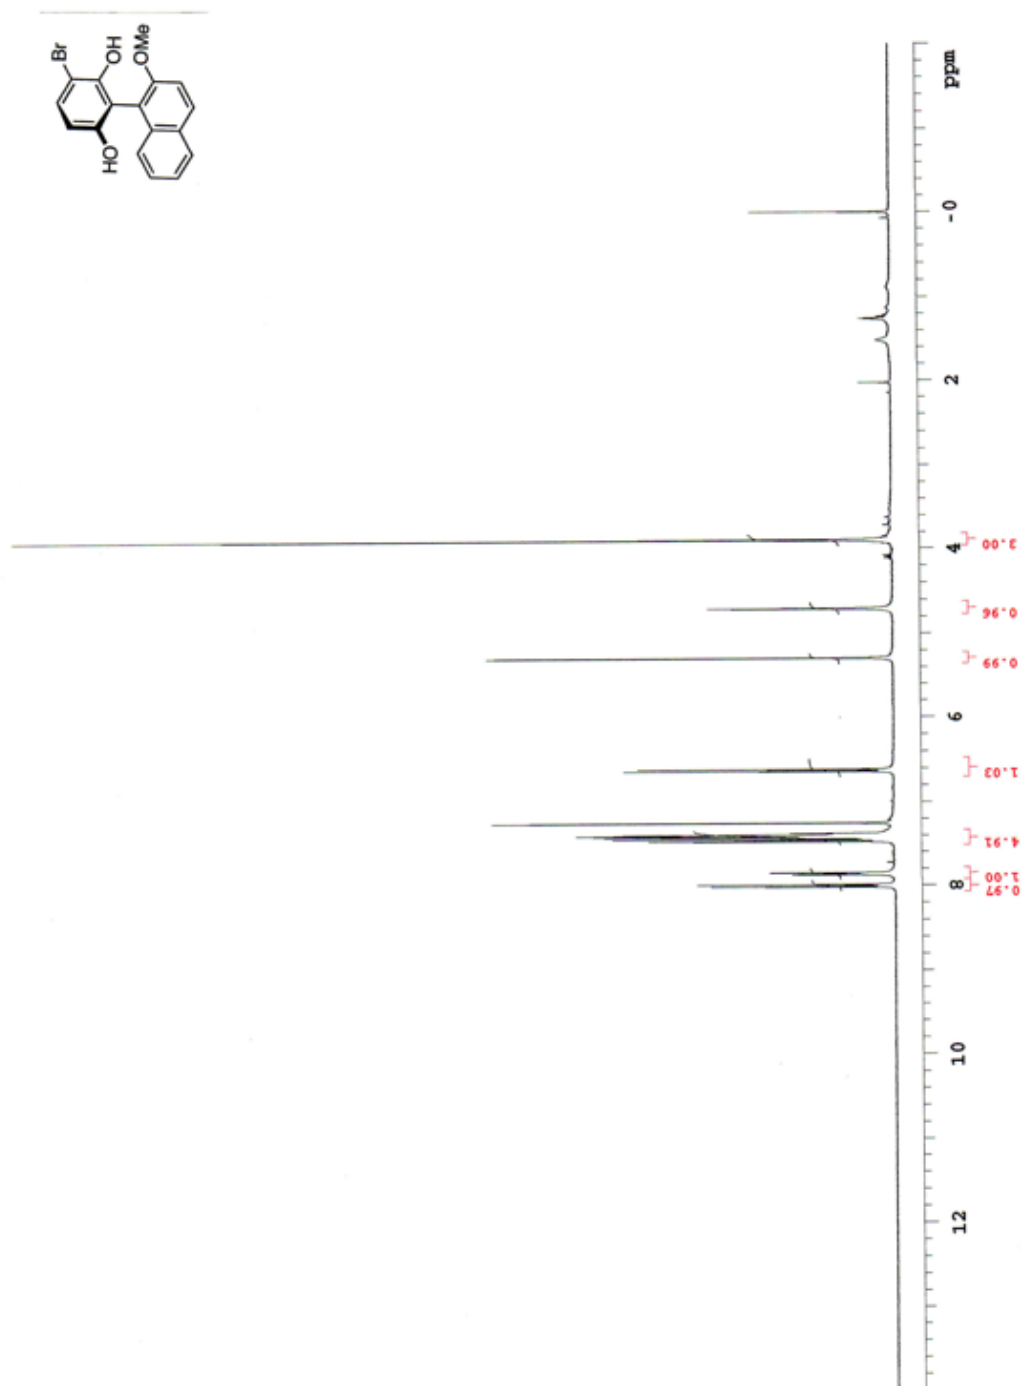

$^{13}\text{C}$  NMR spectrum of **40**.

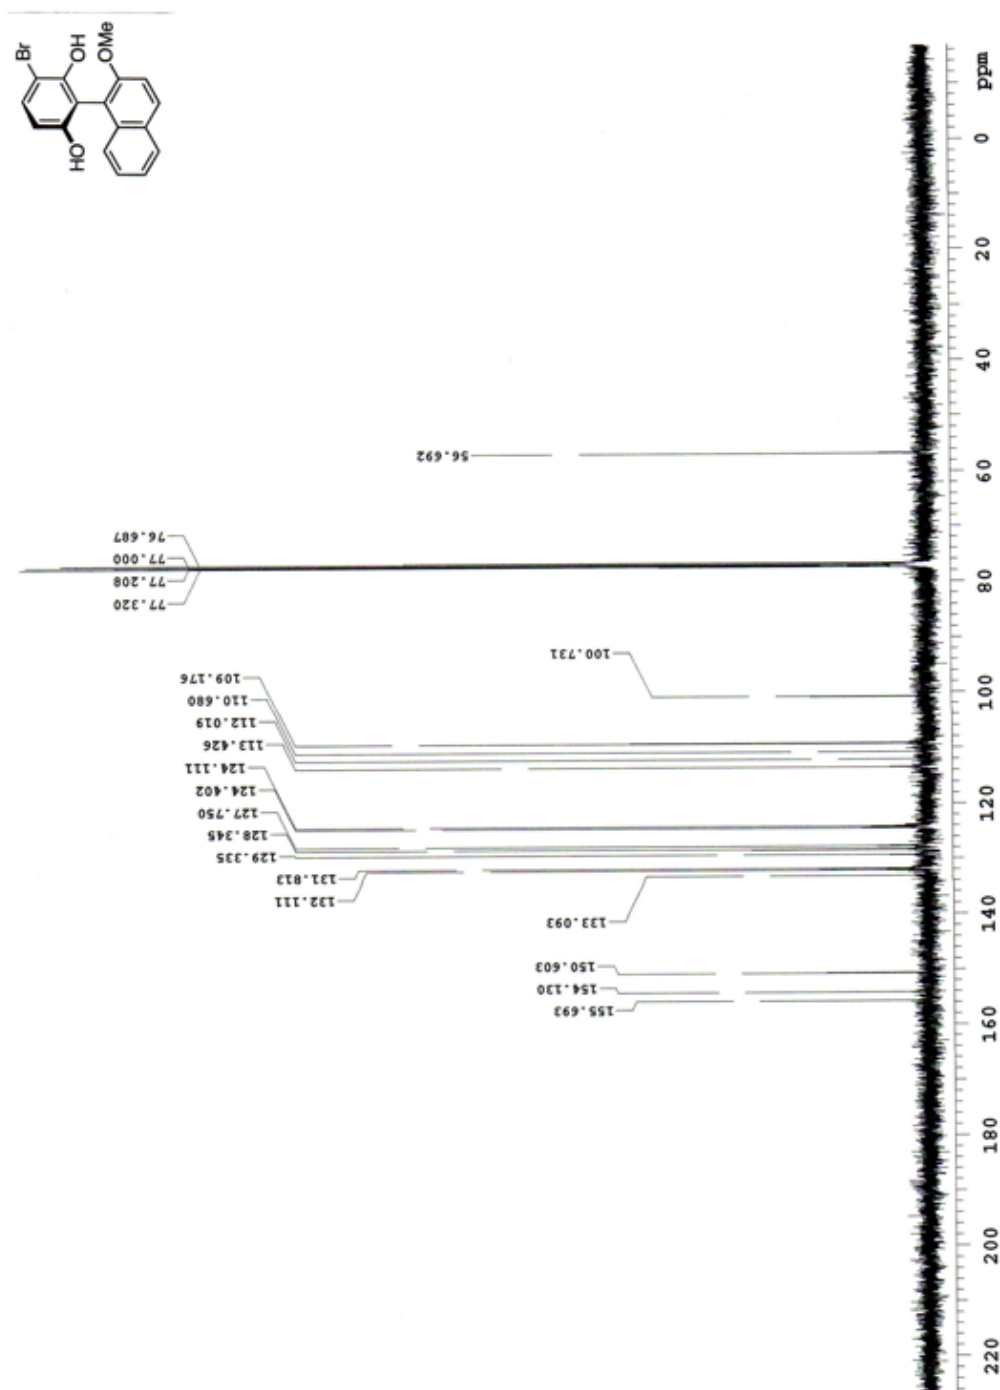

HPLC chart of **4o**.

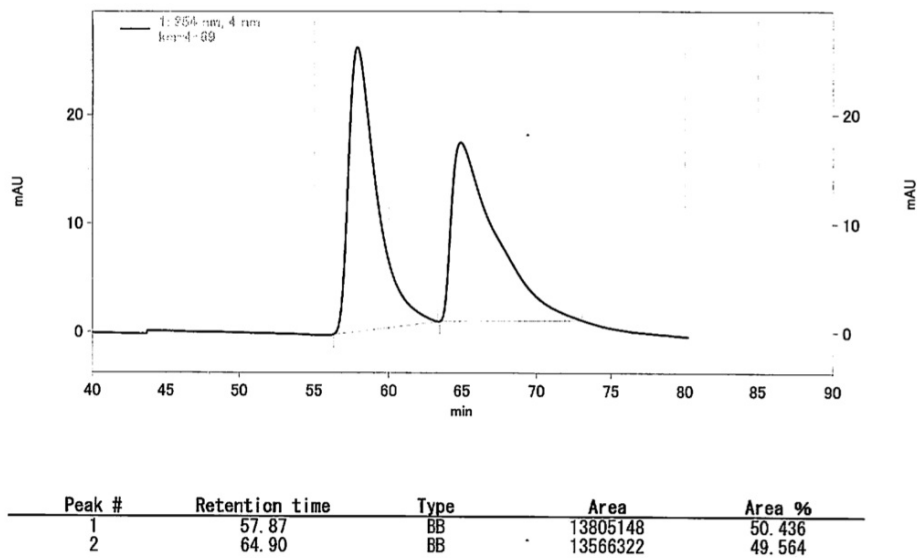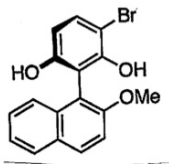

$^1\text{H}$  NMR spectrum of **4p**.

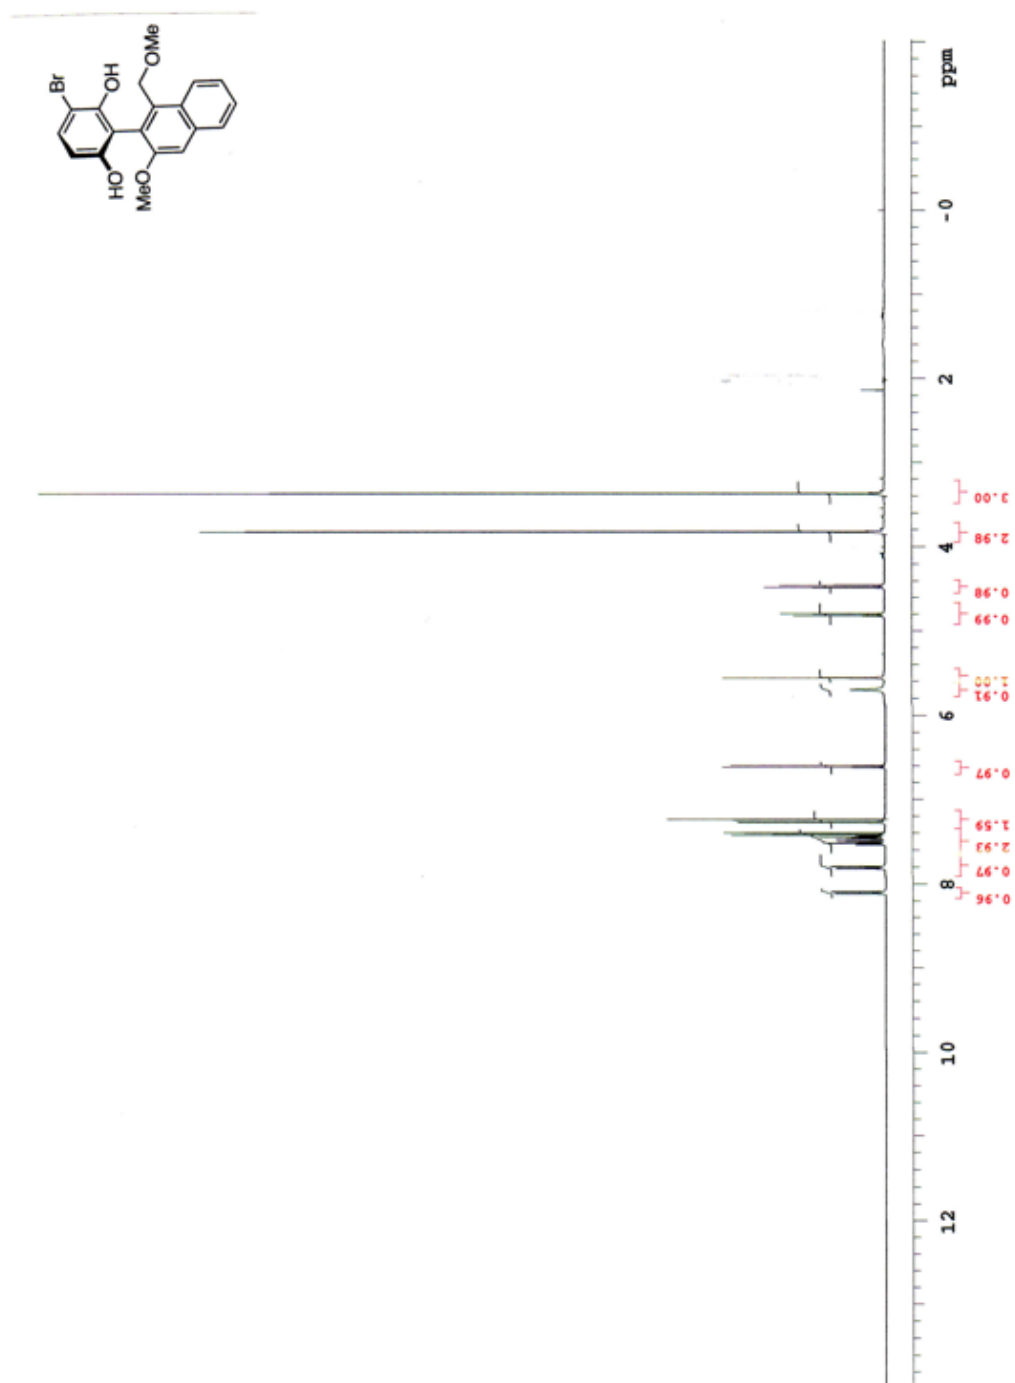

$^{13}\text{C}$  NMR spectrum of **4p**.

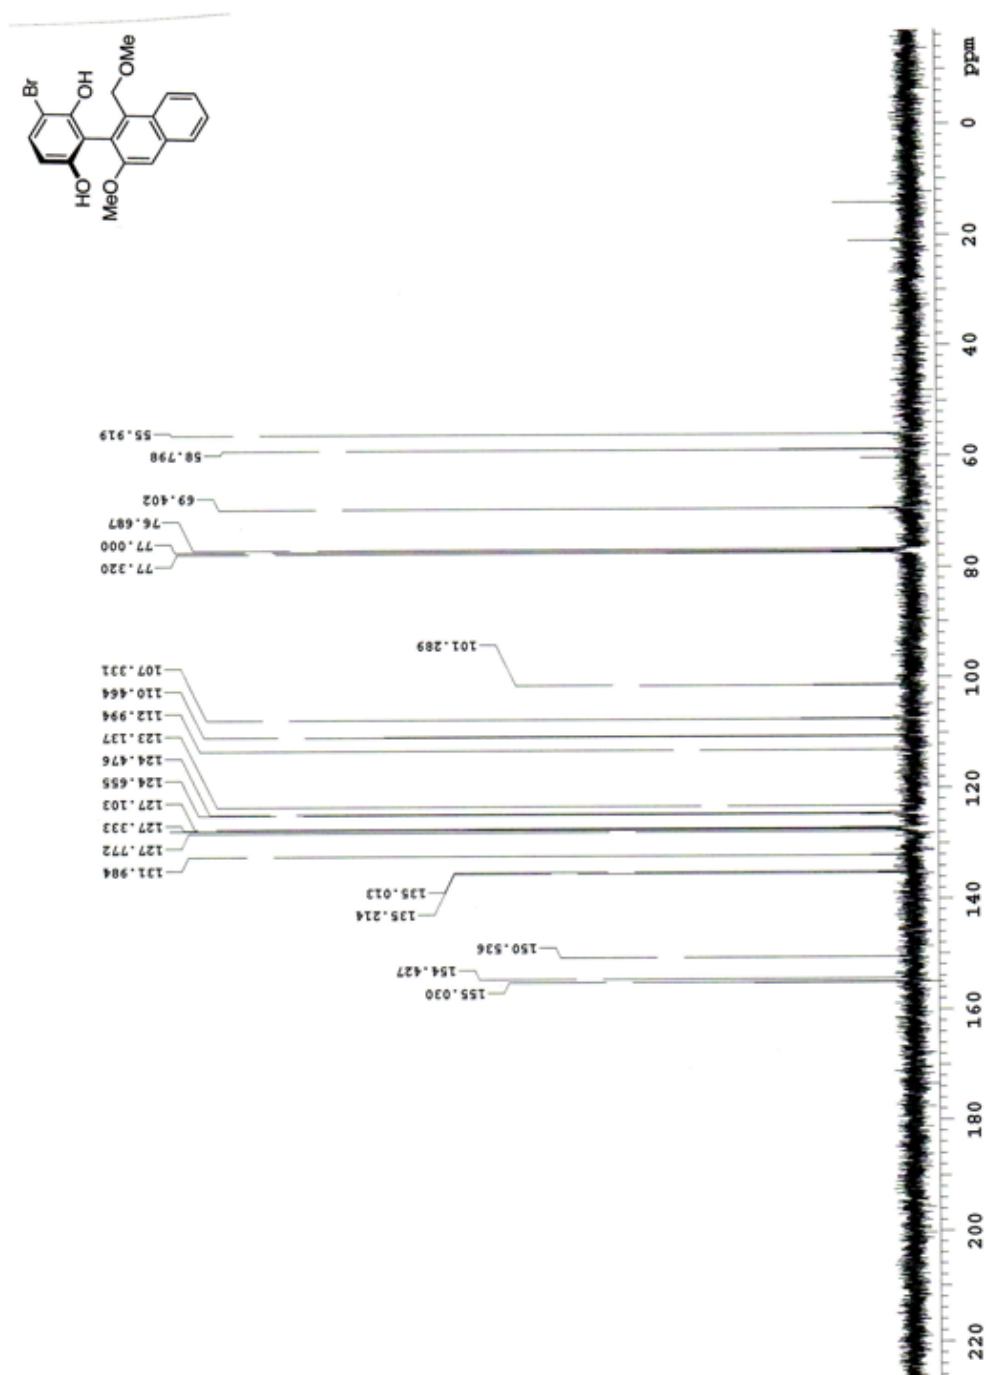



HPLC chart of **4p**.

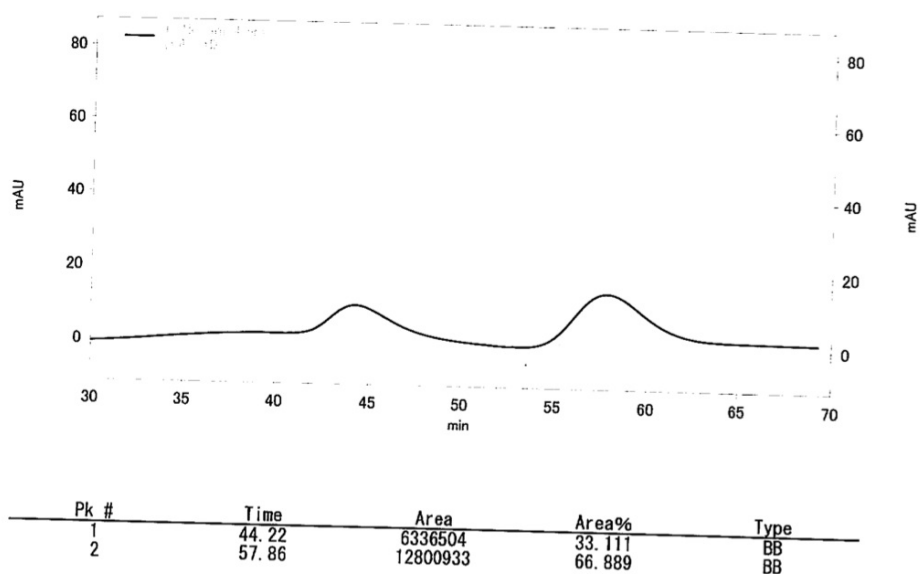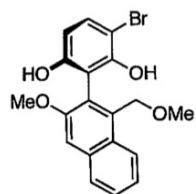

$^1\text{H}$  NMR spectrum of **4r**.

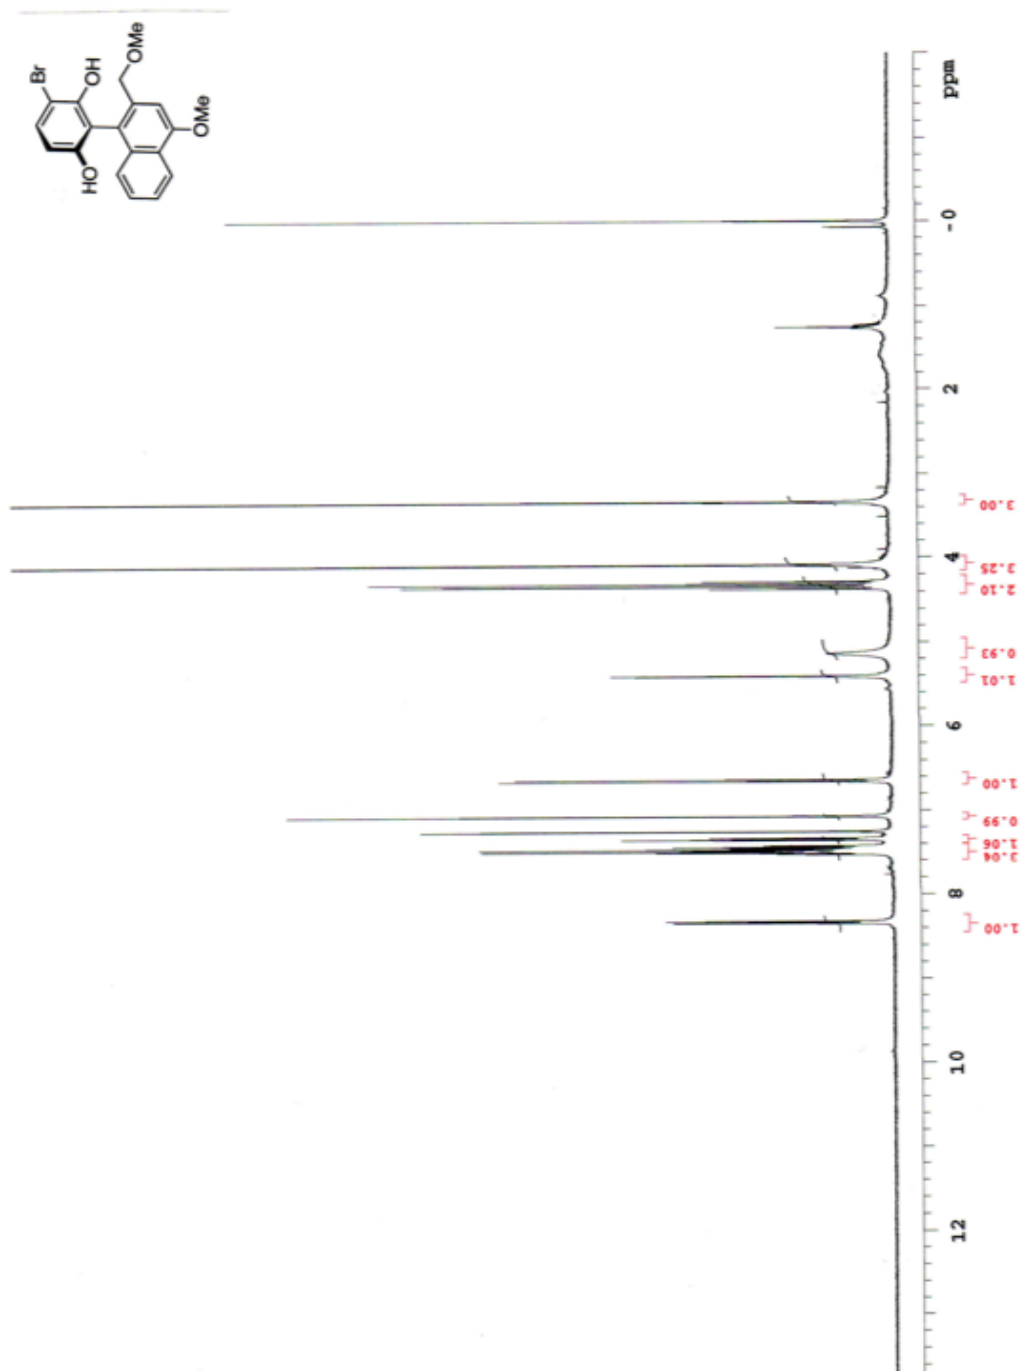

$^{13}\text{C}$  NMR spectrum of **4r**.

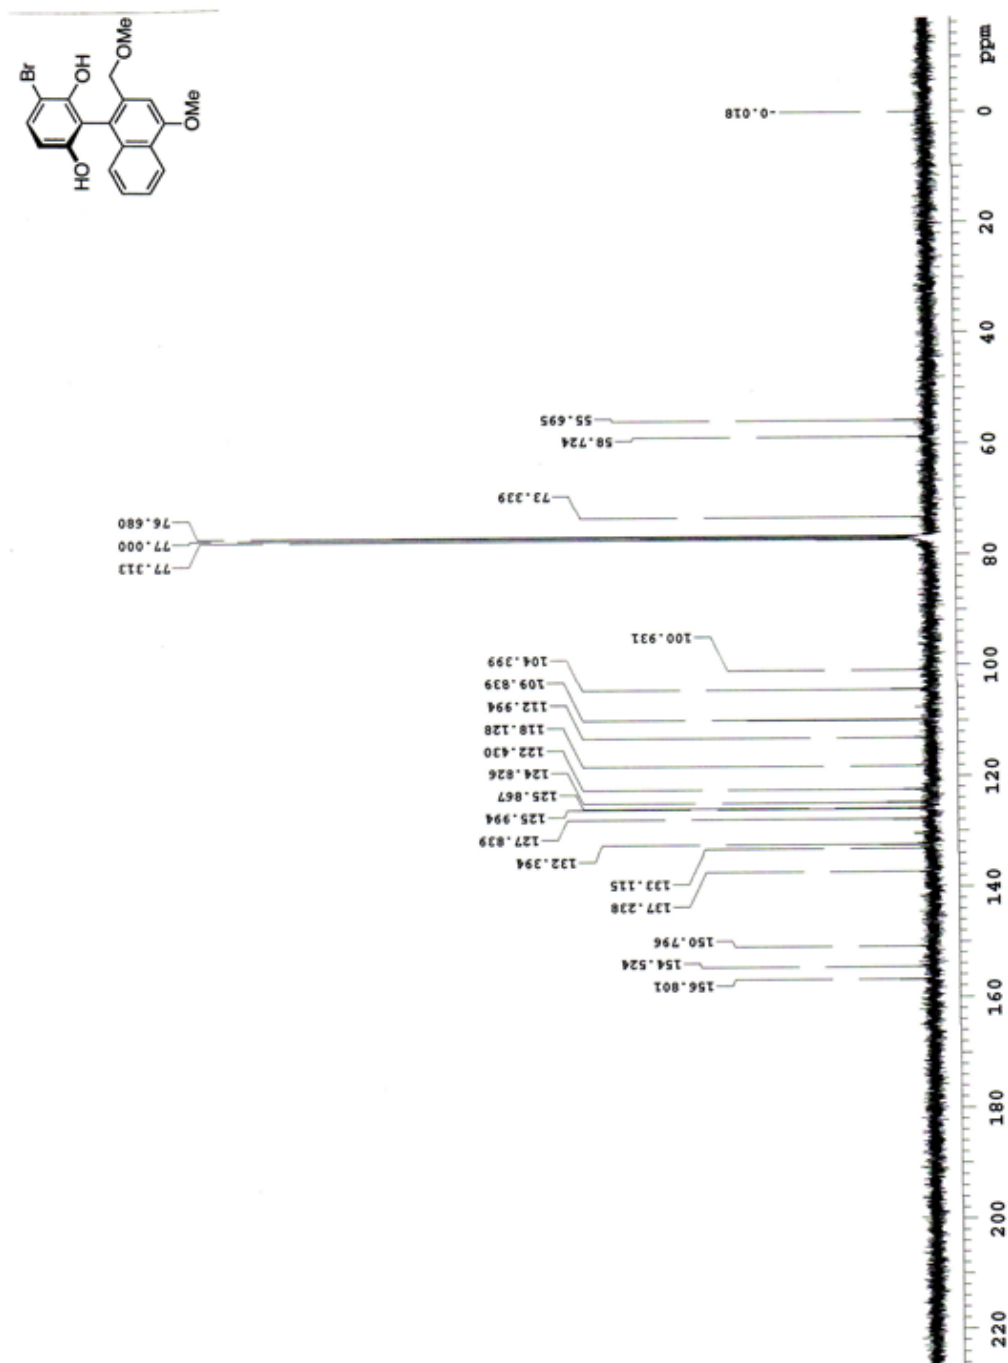

HPLC chart of **4r**.

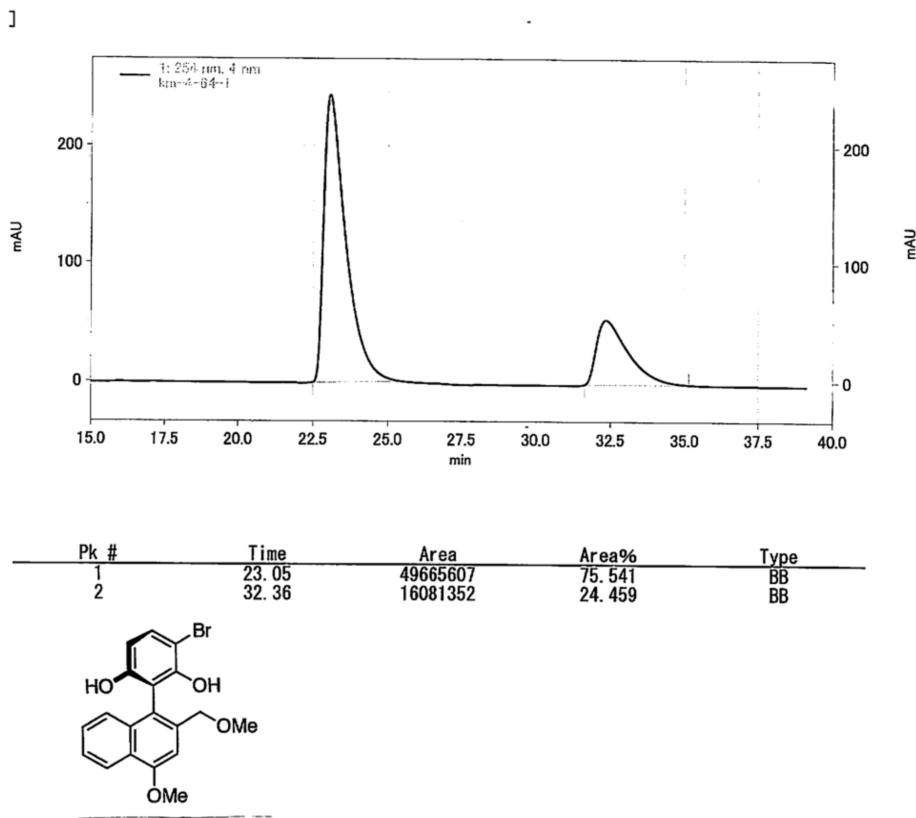

HPLC chart of **4r** (racemic).

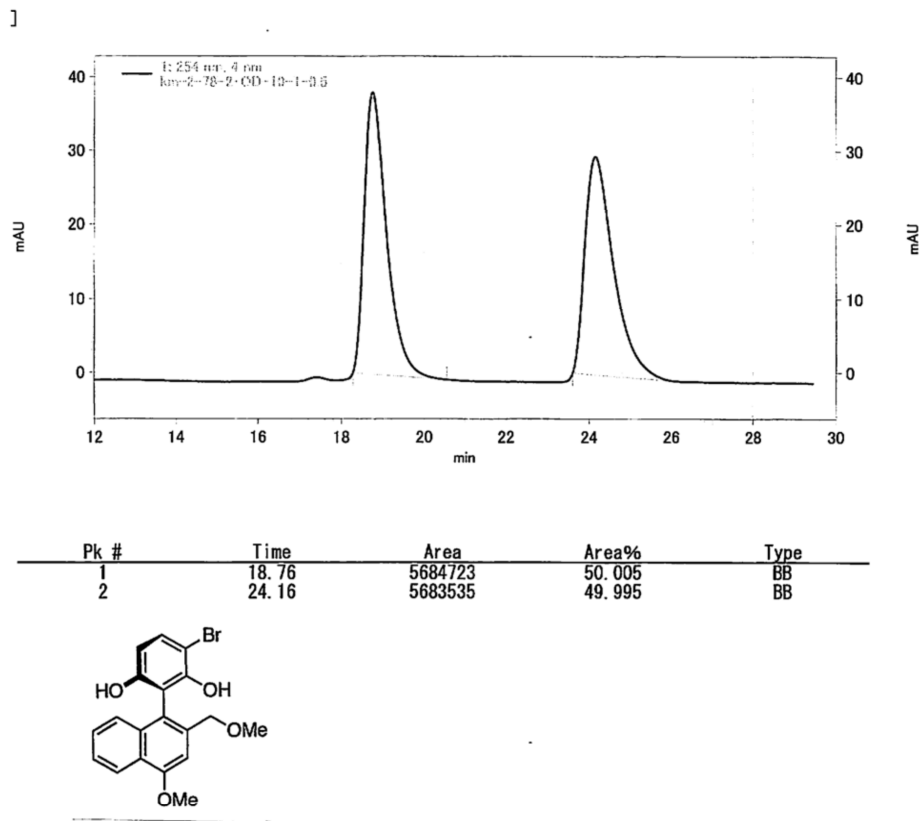

$^1\text{H}$  NMR spectrum of **4s**.

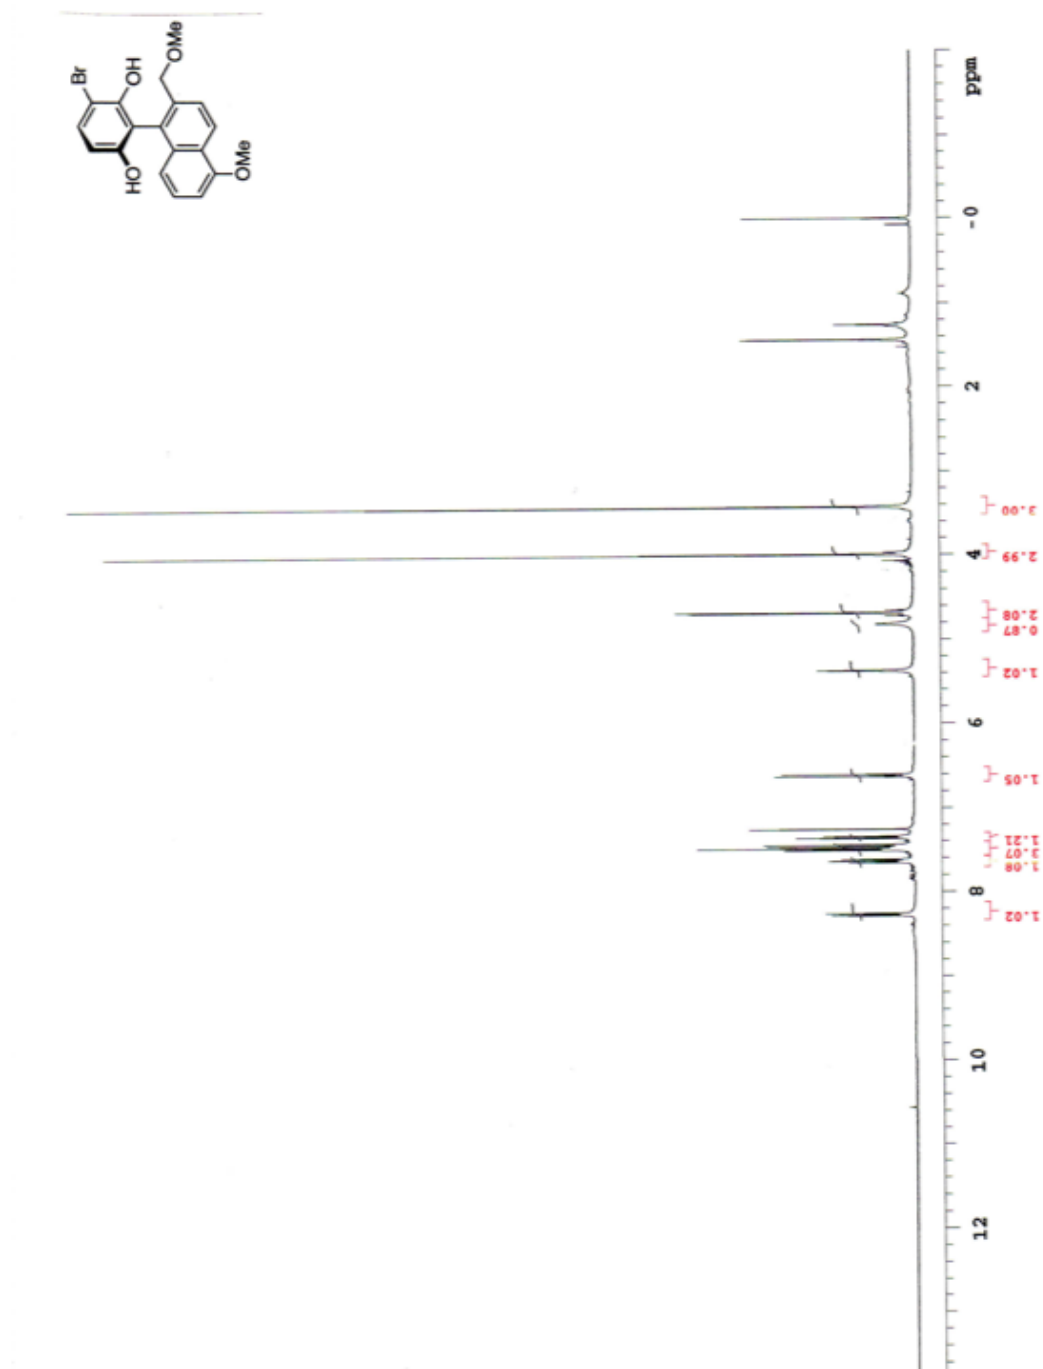

$^{13}\text{C}$  NMR spectrum of **4s**.

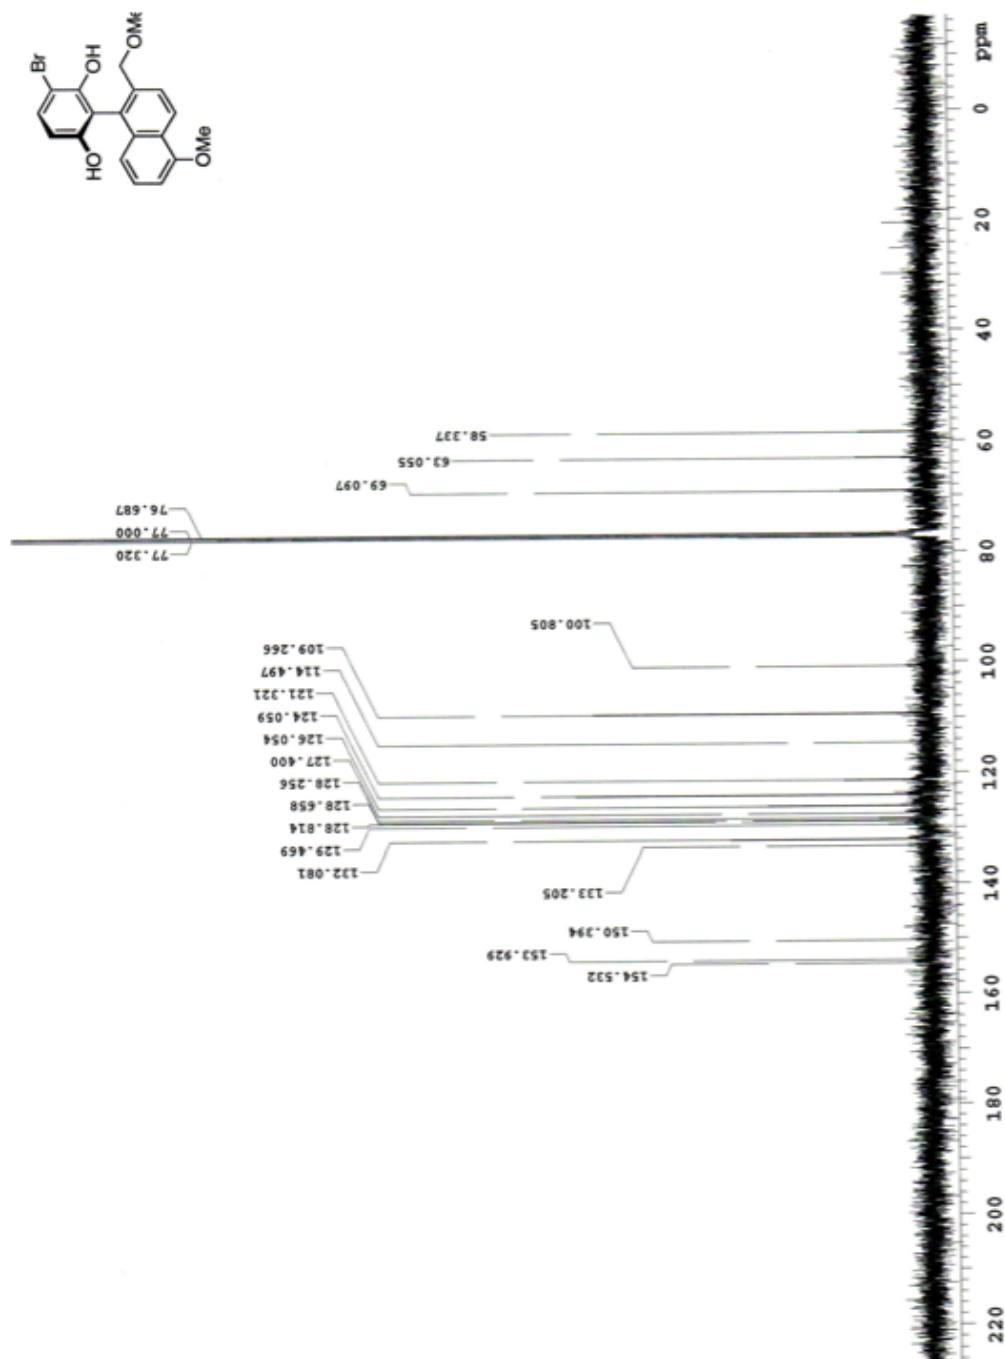

HPLC chart of **4s**.

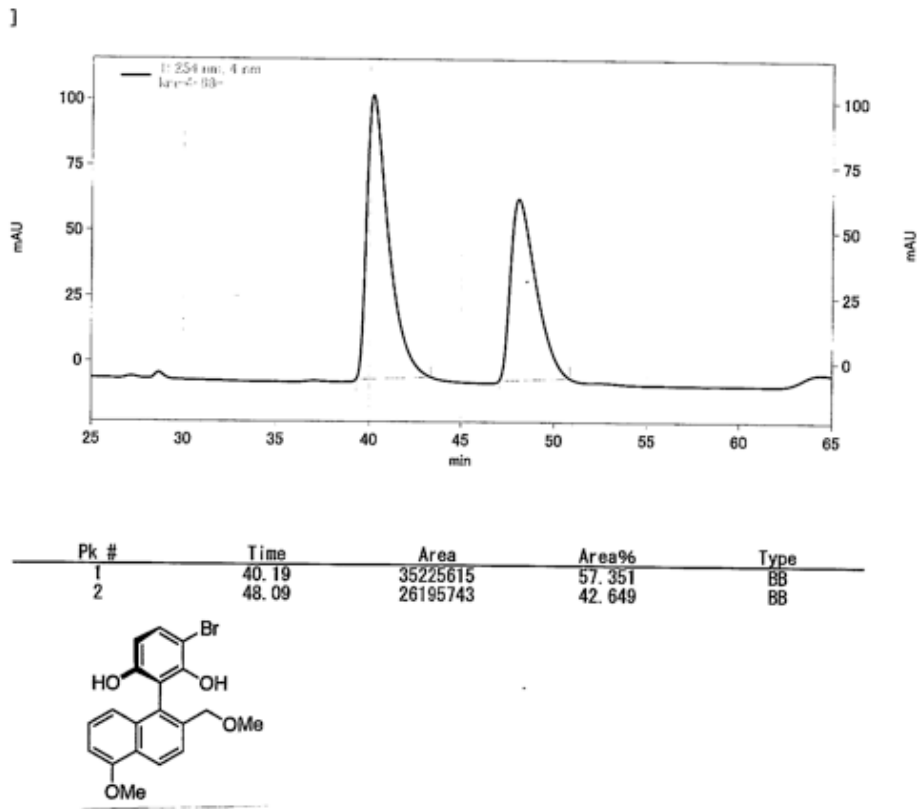



$^1\text{H}$  NMR spectrum of **4t**.

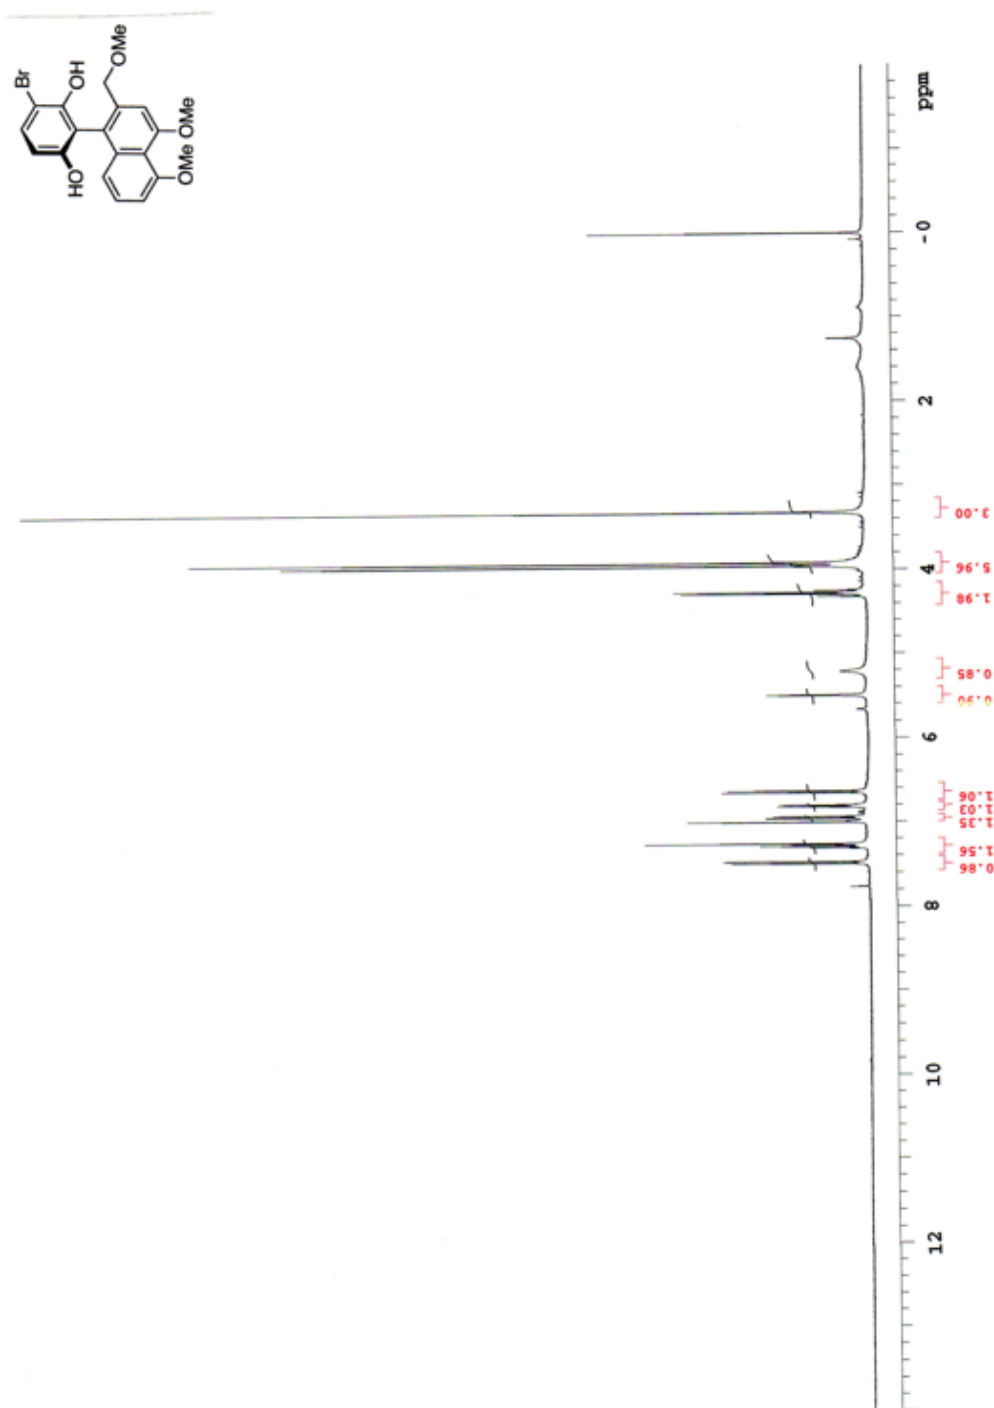

$^{13}\text{C}$  NMR spectrum of **4t**.

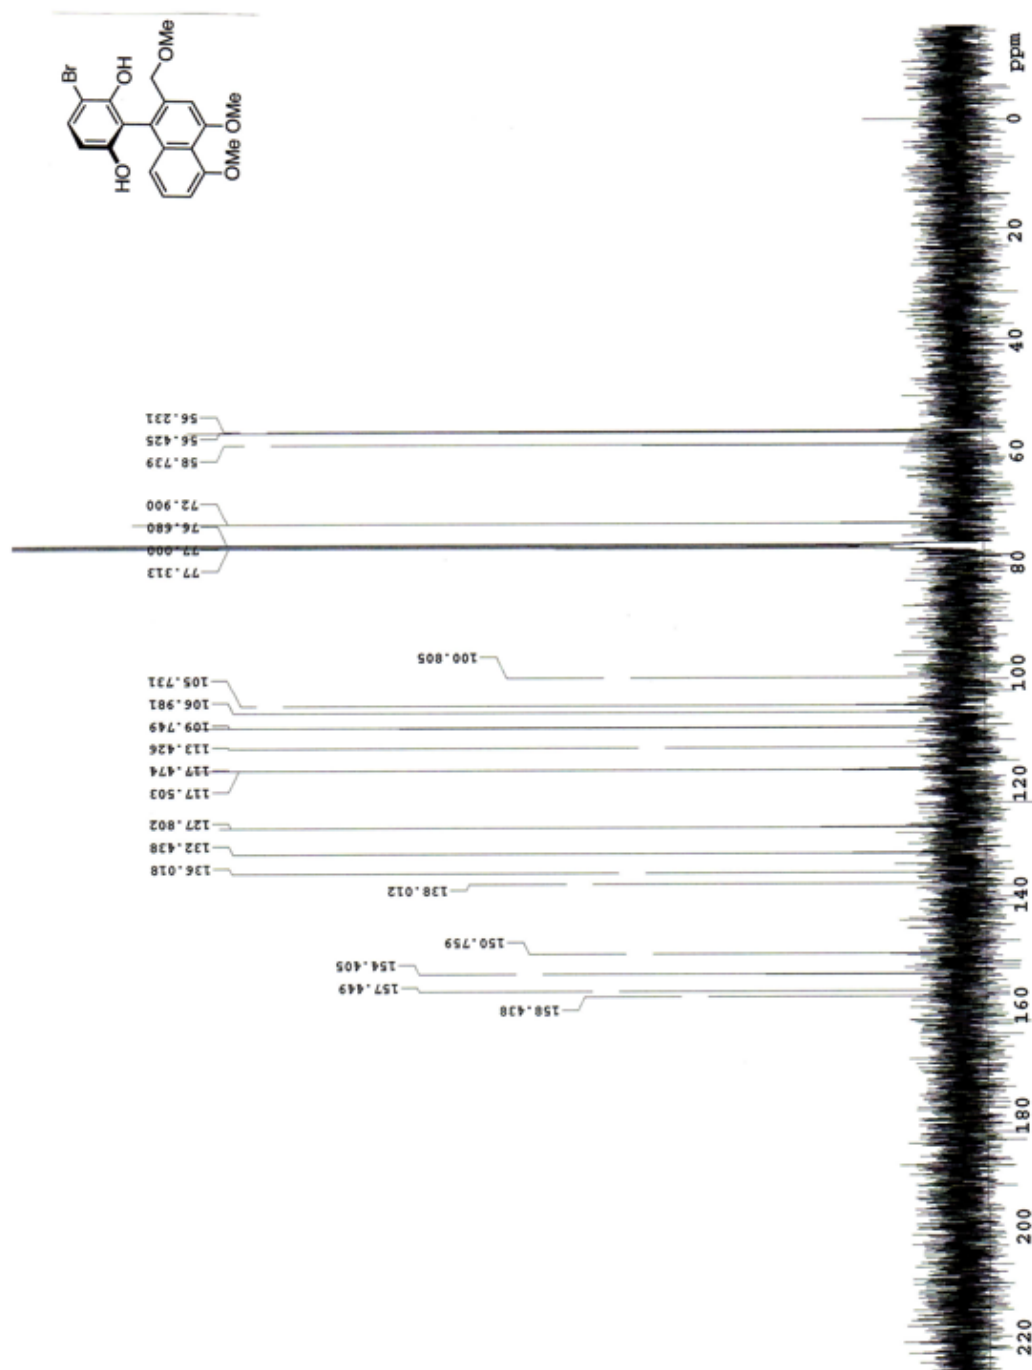

HPLC chart of **4t**.

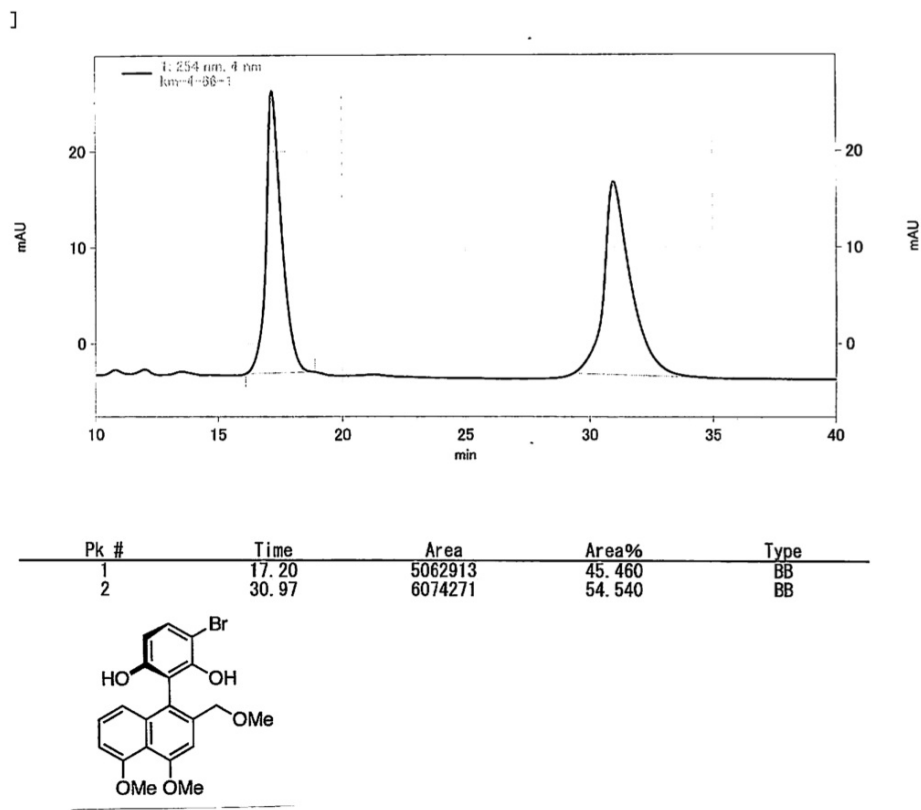

$^1\text{H}$  NMR spectrum of the mixture of **3b** and **2j** (X = 9-anthryl).

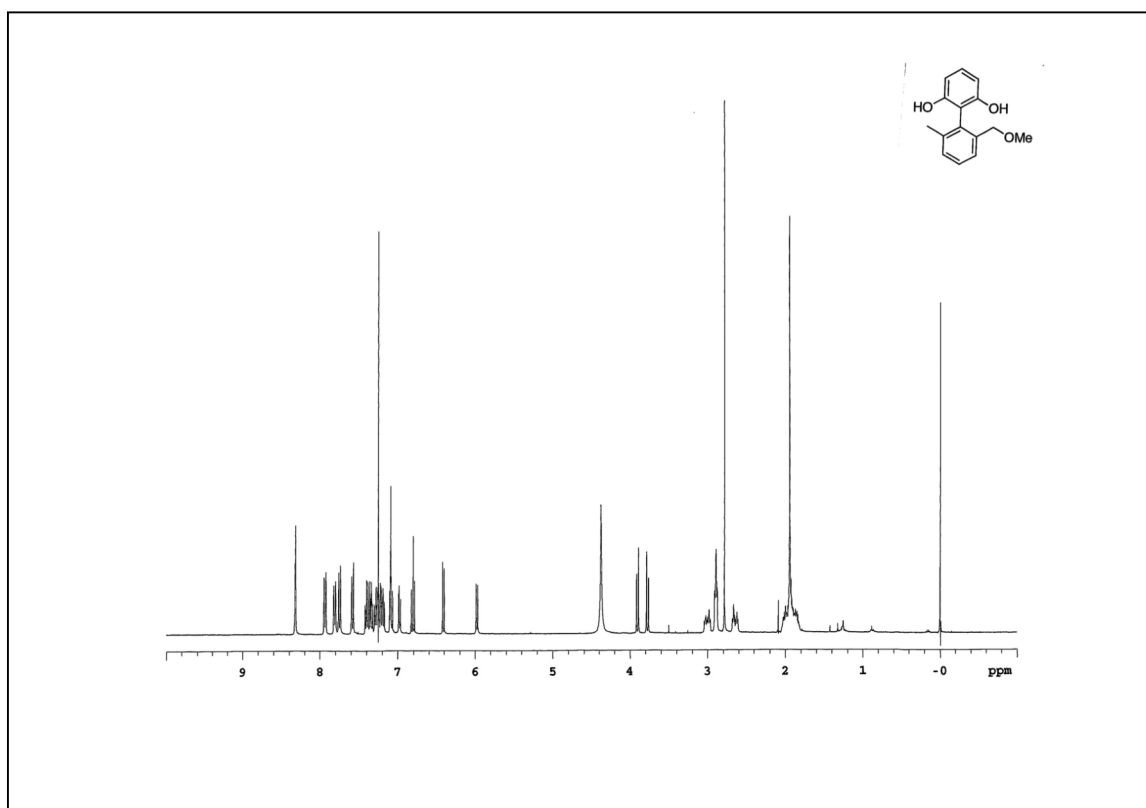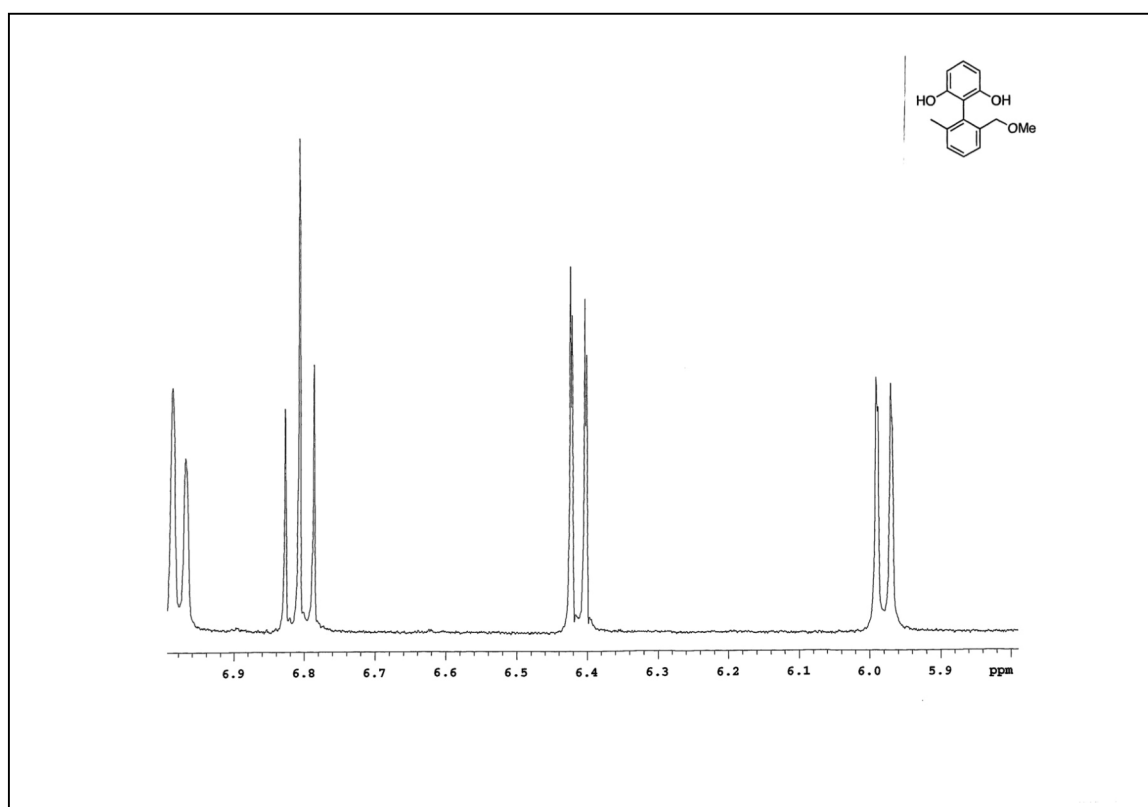

$^1\text{H}$  NMR spectrum of the mixture of **3c** and **2j** (X = 9-anthryl).

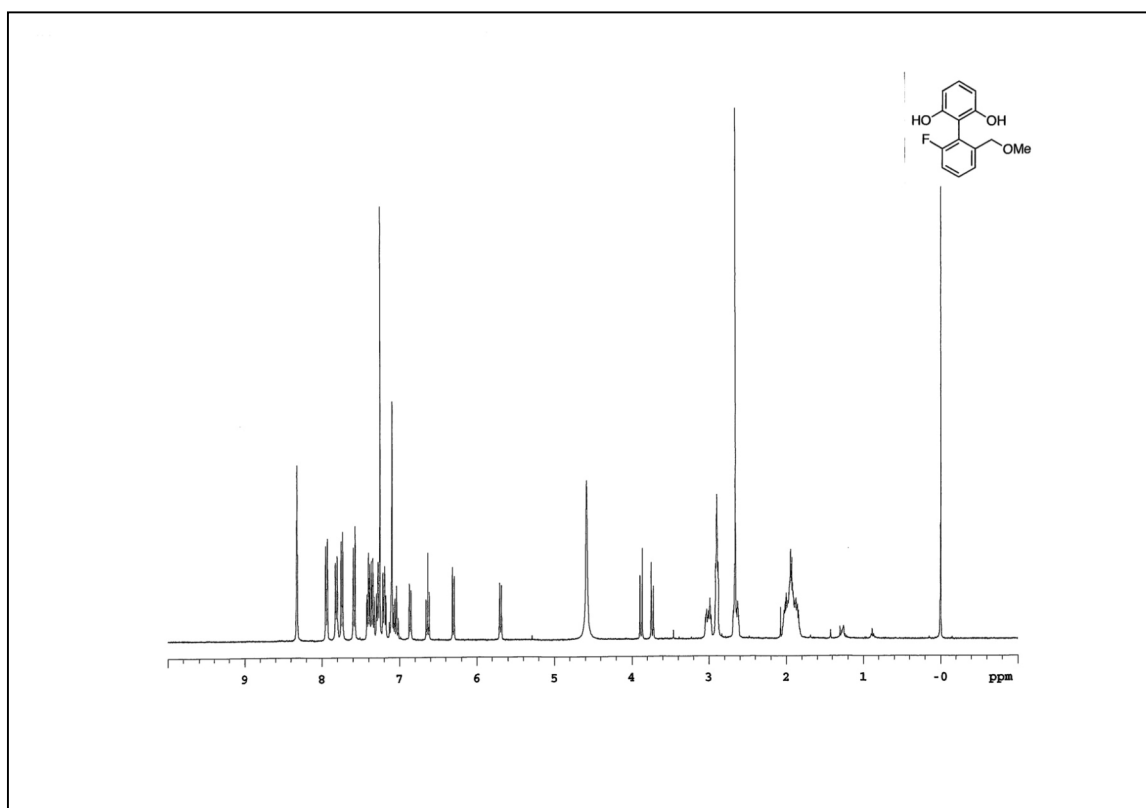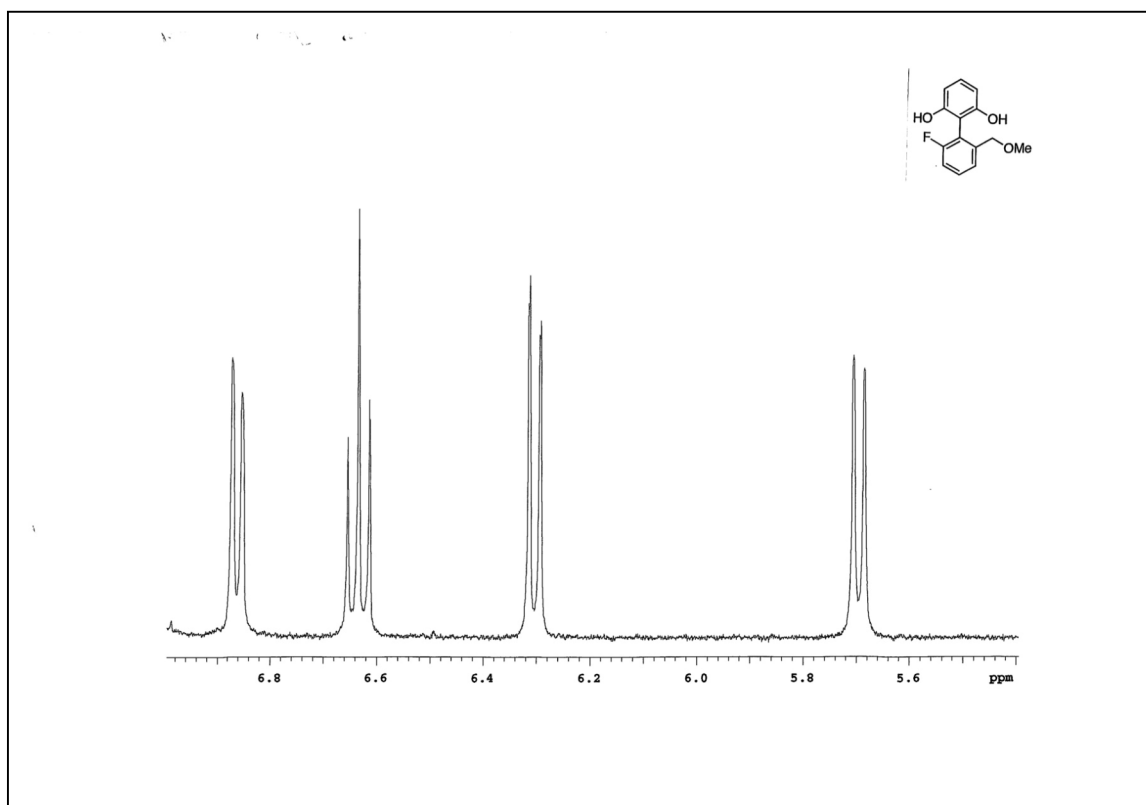

$^1\text{H}$  NMR spectrum of the mixture of **3d** and **2j** (X = 9-anthryl).

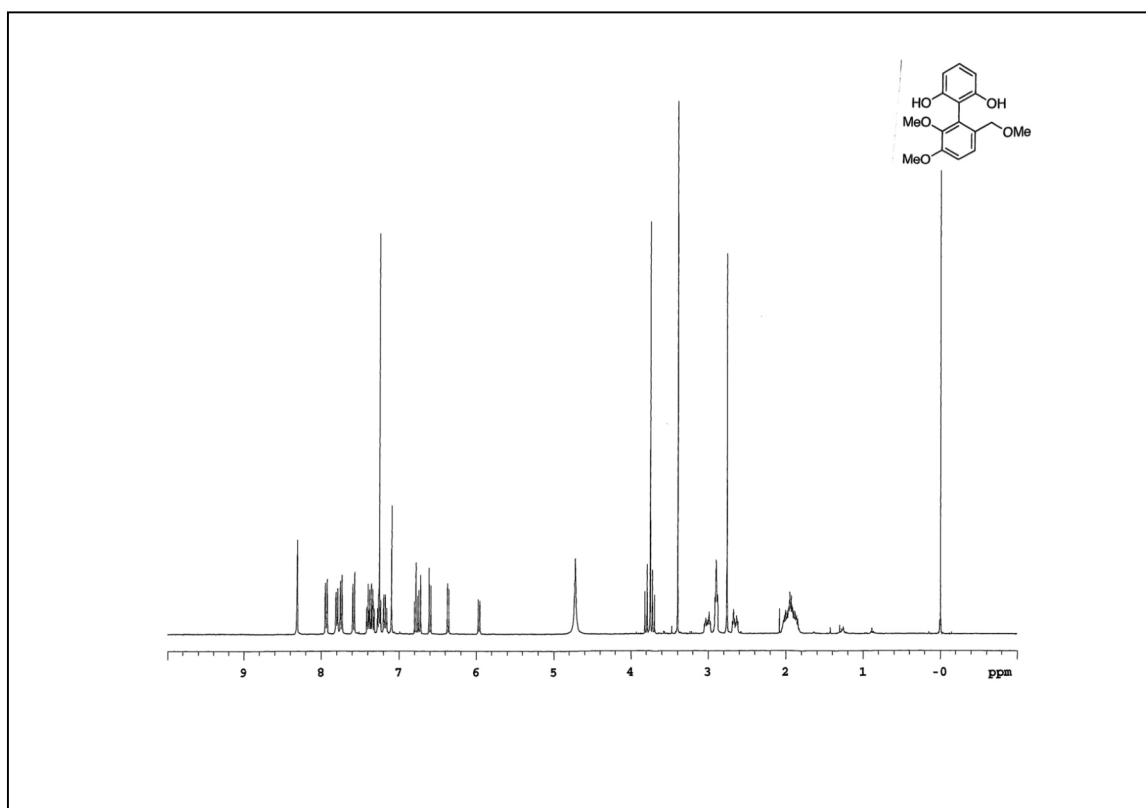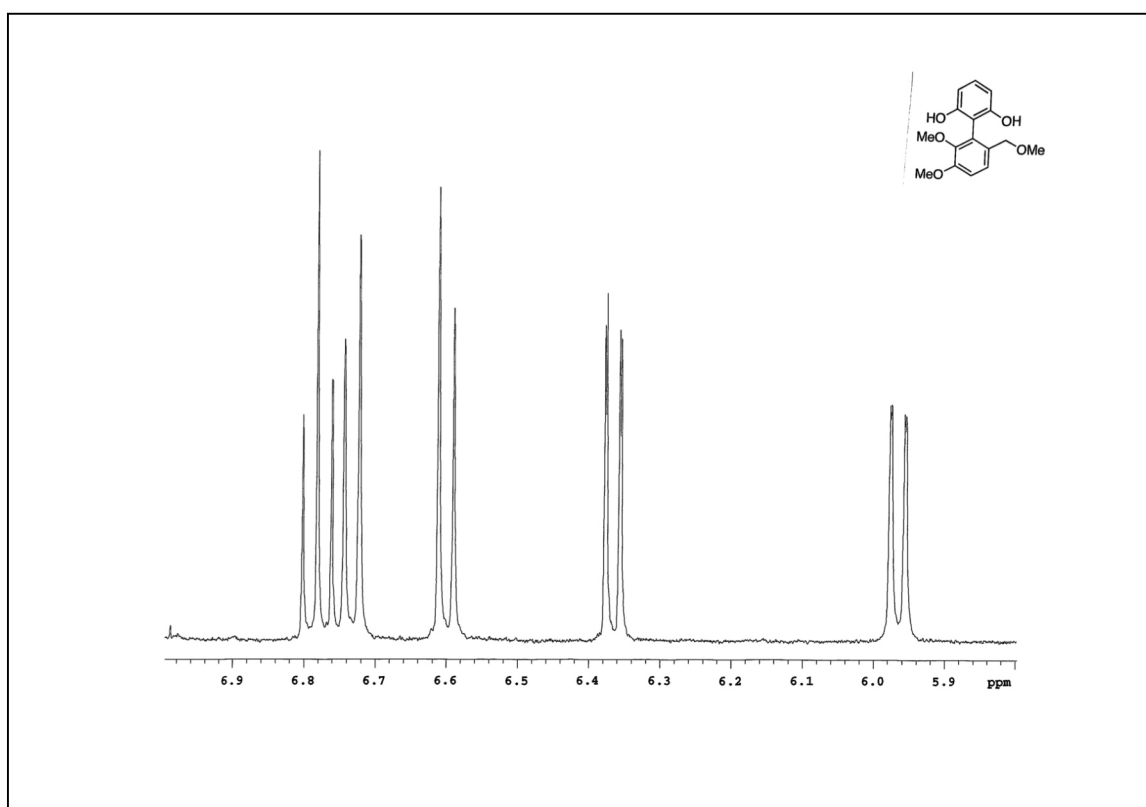

$^1\text{H}$  NMR spectrum of the mixture of **3e** and **2j** (X = 9-anthryl).

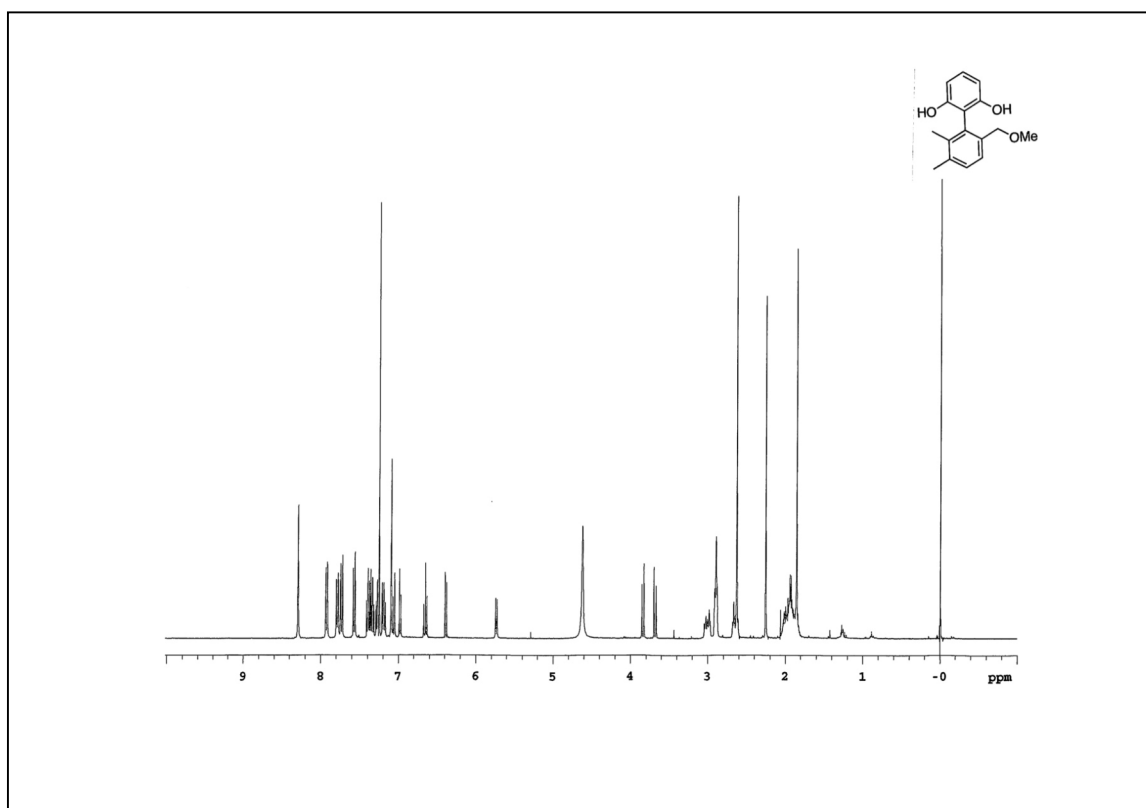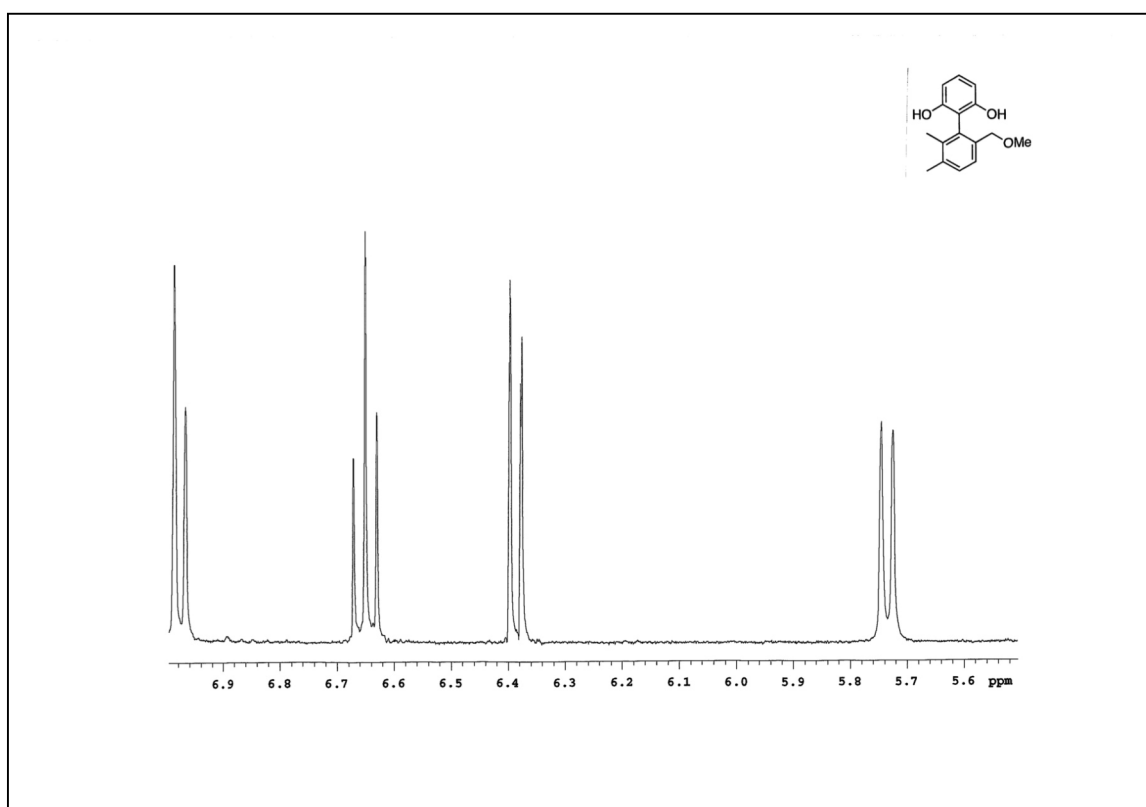

$^1\text{H}$  NMR spectrum of the mixture of **3f** and **2j** (X = 9-anthryl).

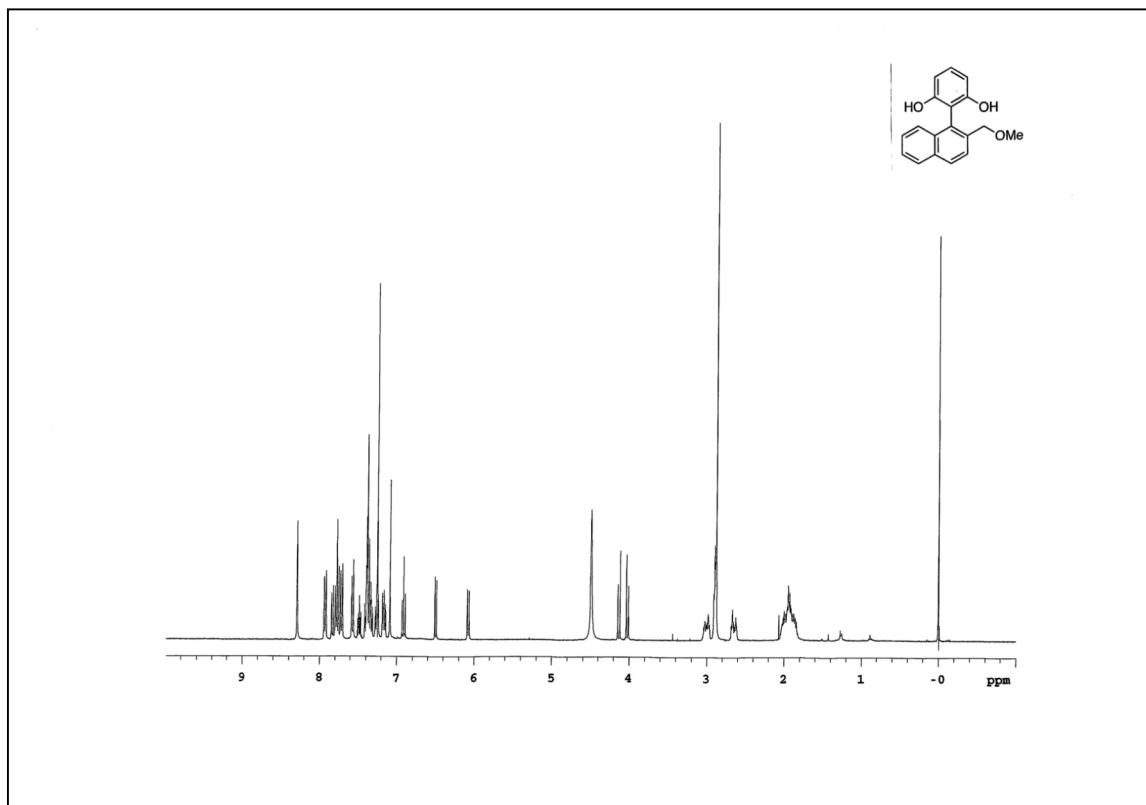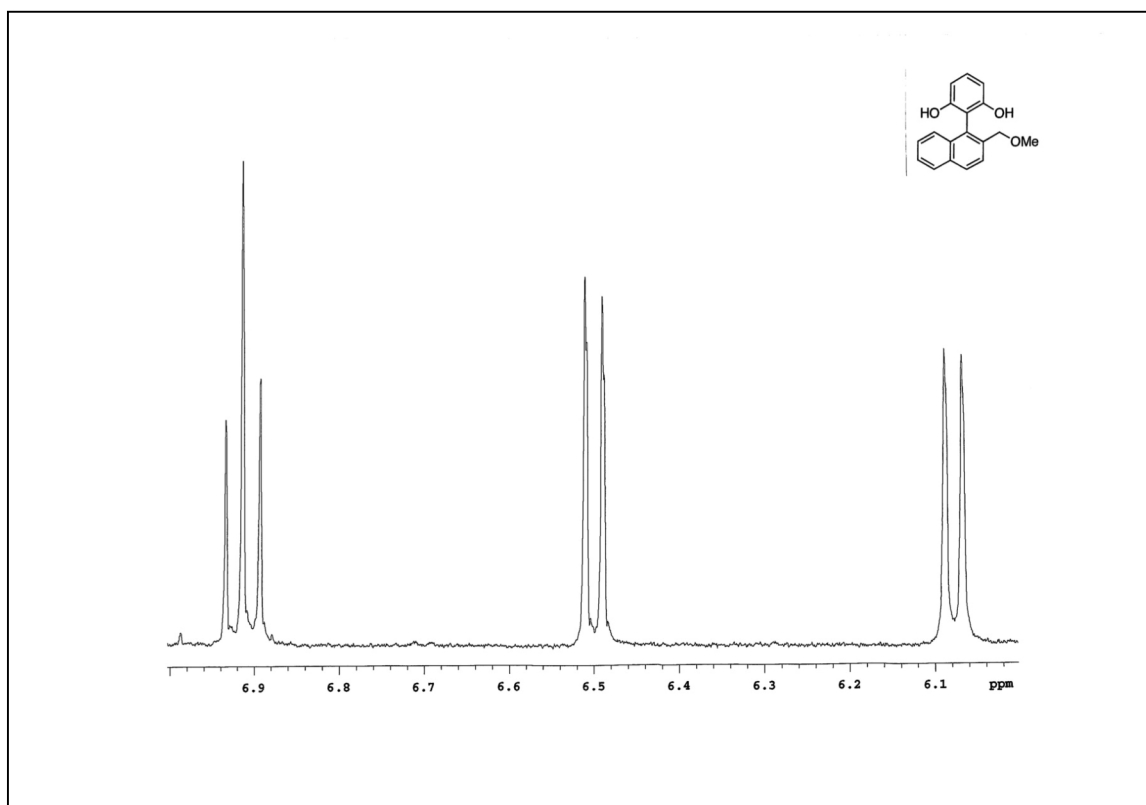



$^1\text{H}$  NMR spectrum of the mixture of **3g** and **2j** (X = 9-anthryl).

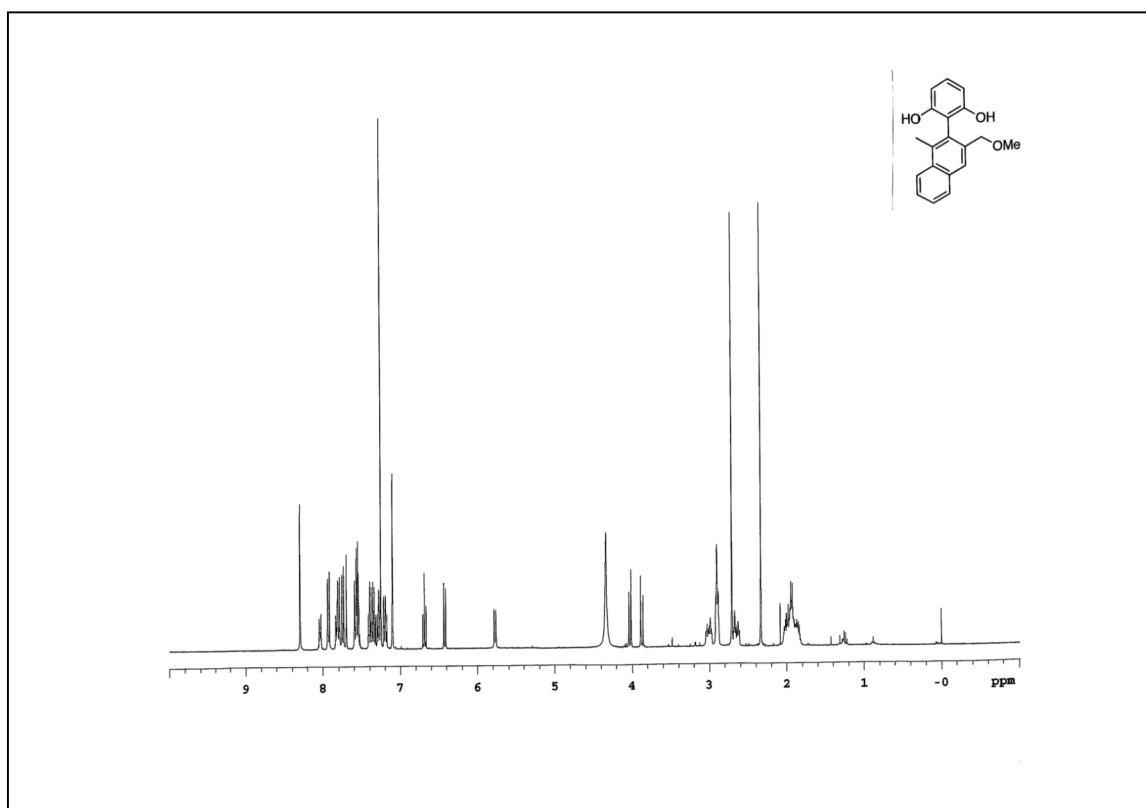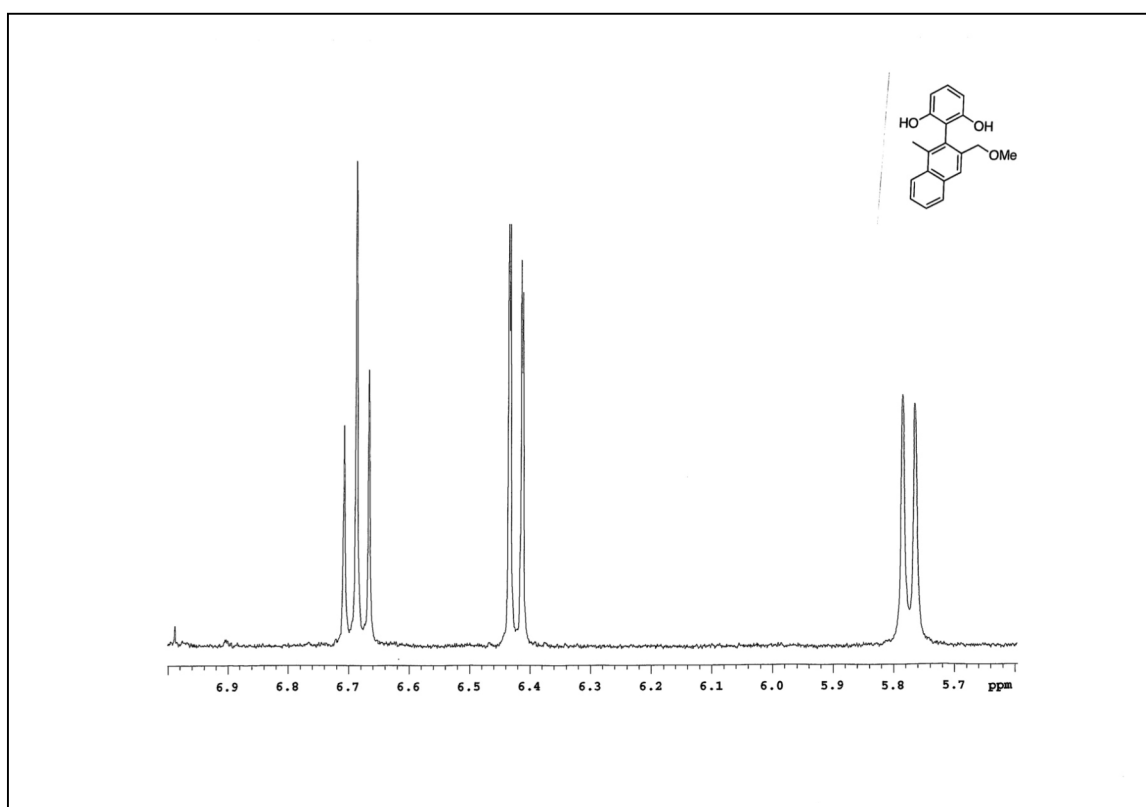

$^1\text{H}$  NMR spectrum of the mixture of **3h** and **2j** (X = 9-anthryl).

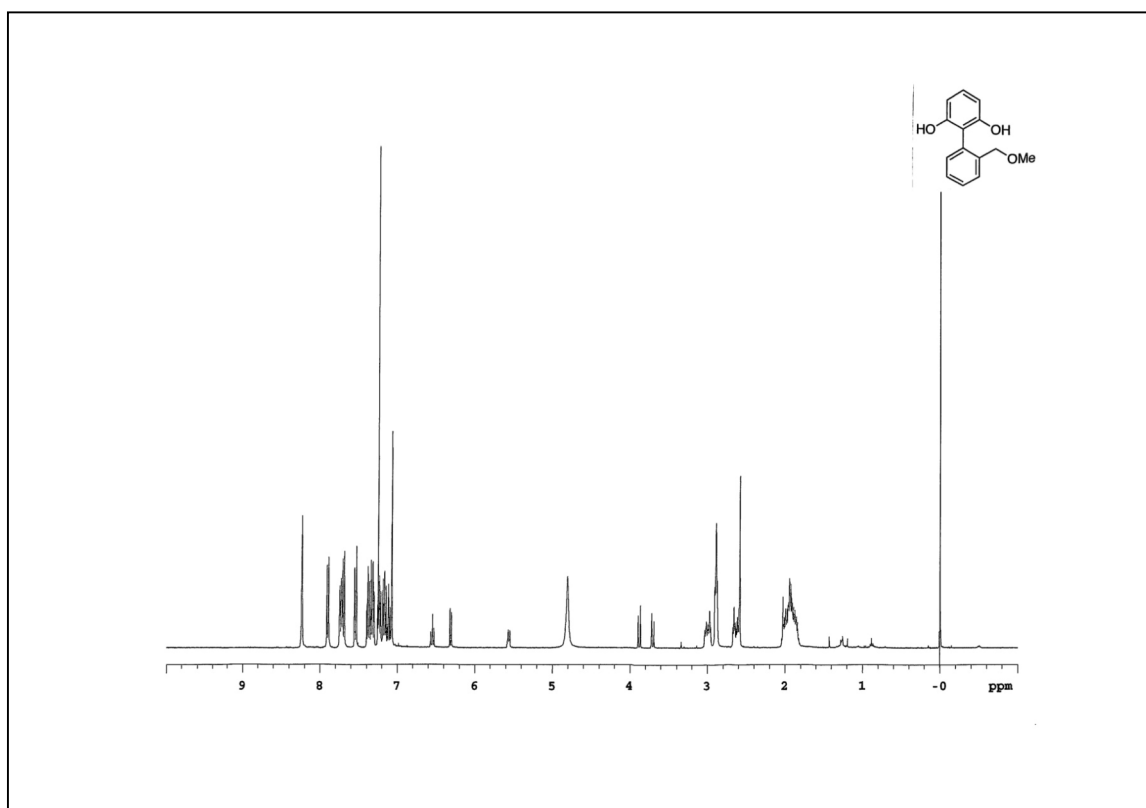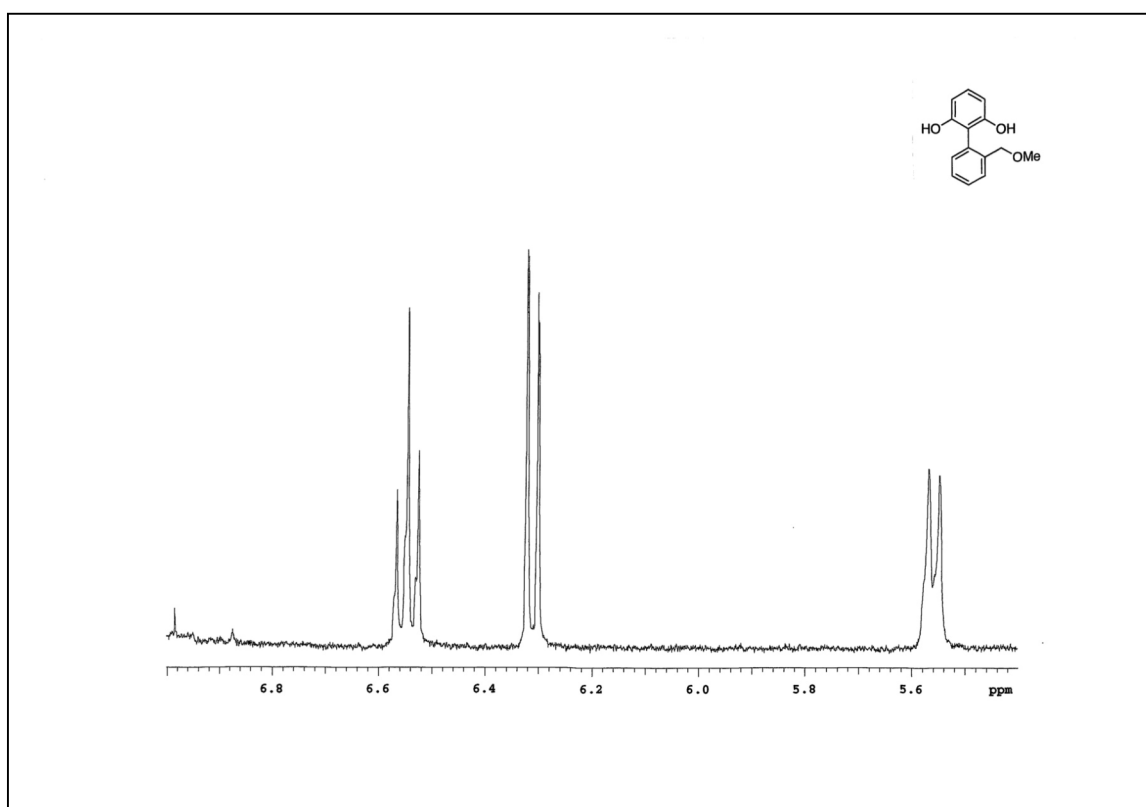

$^1\text{H}$  NMR spectrum of the mixture of **3i** and **2j** (X = 9-anthryl).

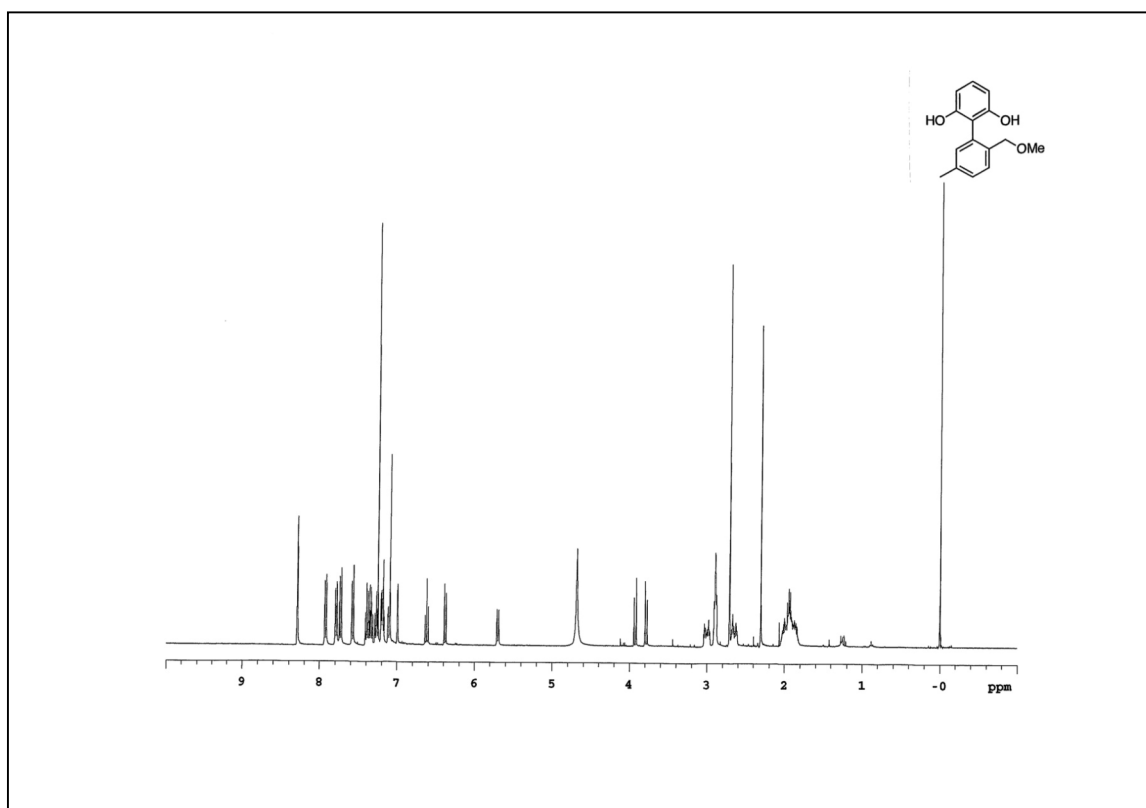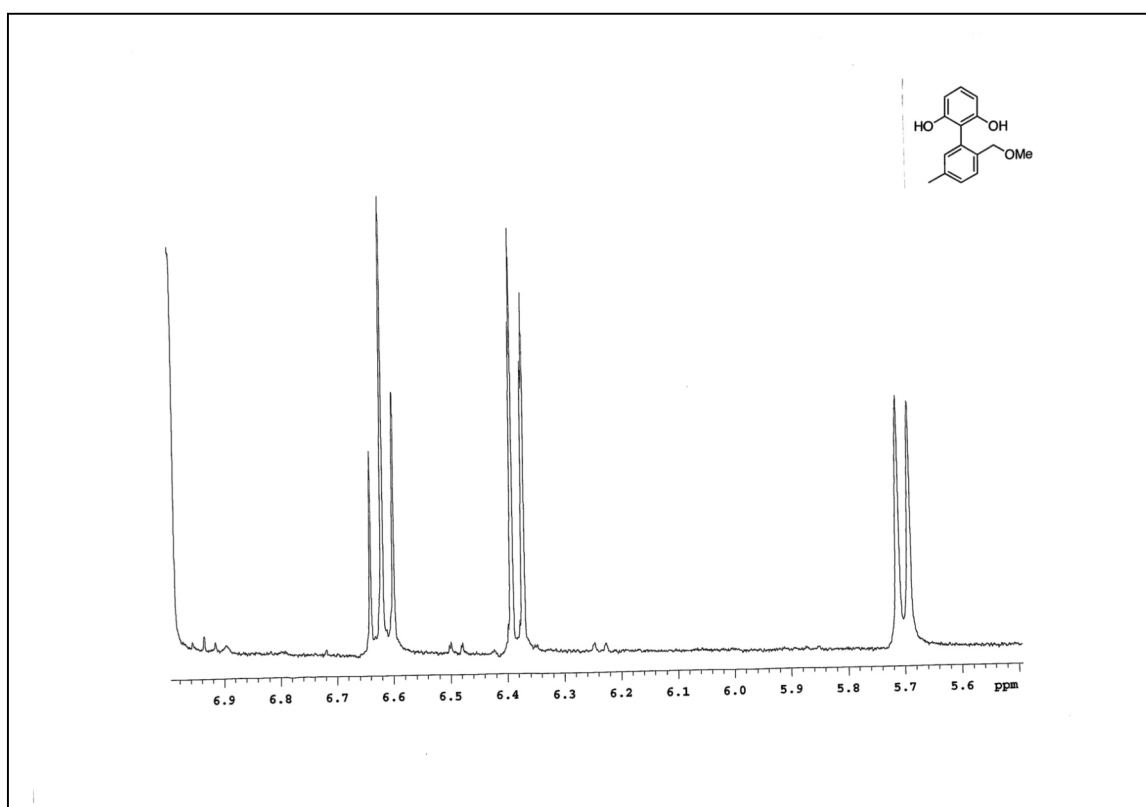

$^1\text{H}$  NMR spectrum of the mixture of **3j** and **2j** (X = 9-anthryl).

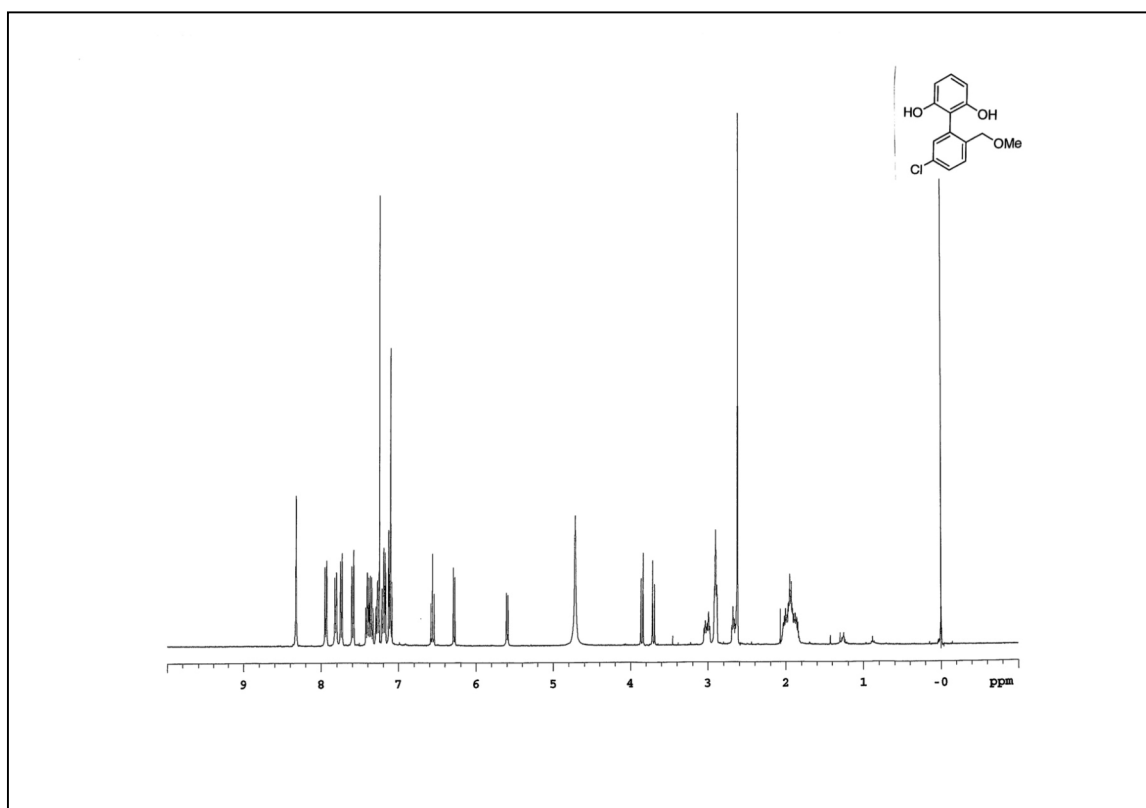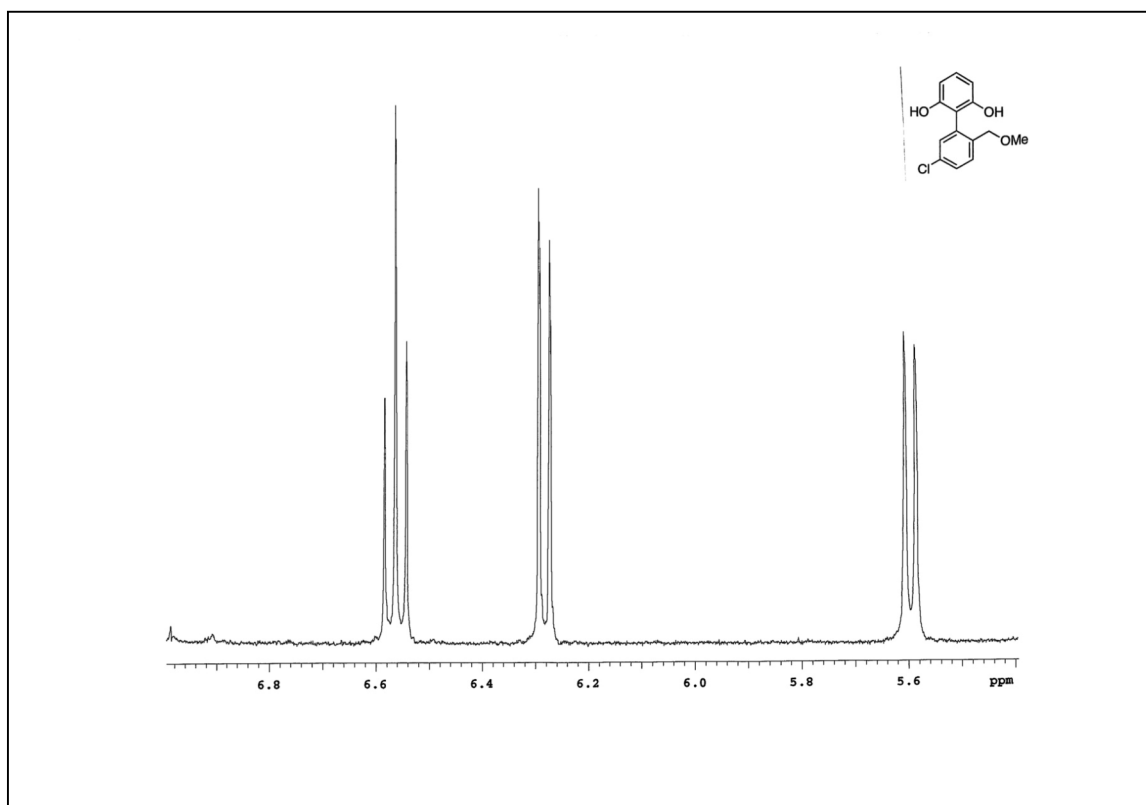

$^1\text{H}$  NMR spectrum of the mixture of **3k** and **2j** (X = 9-anthryl).

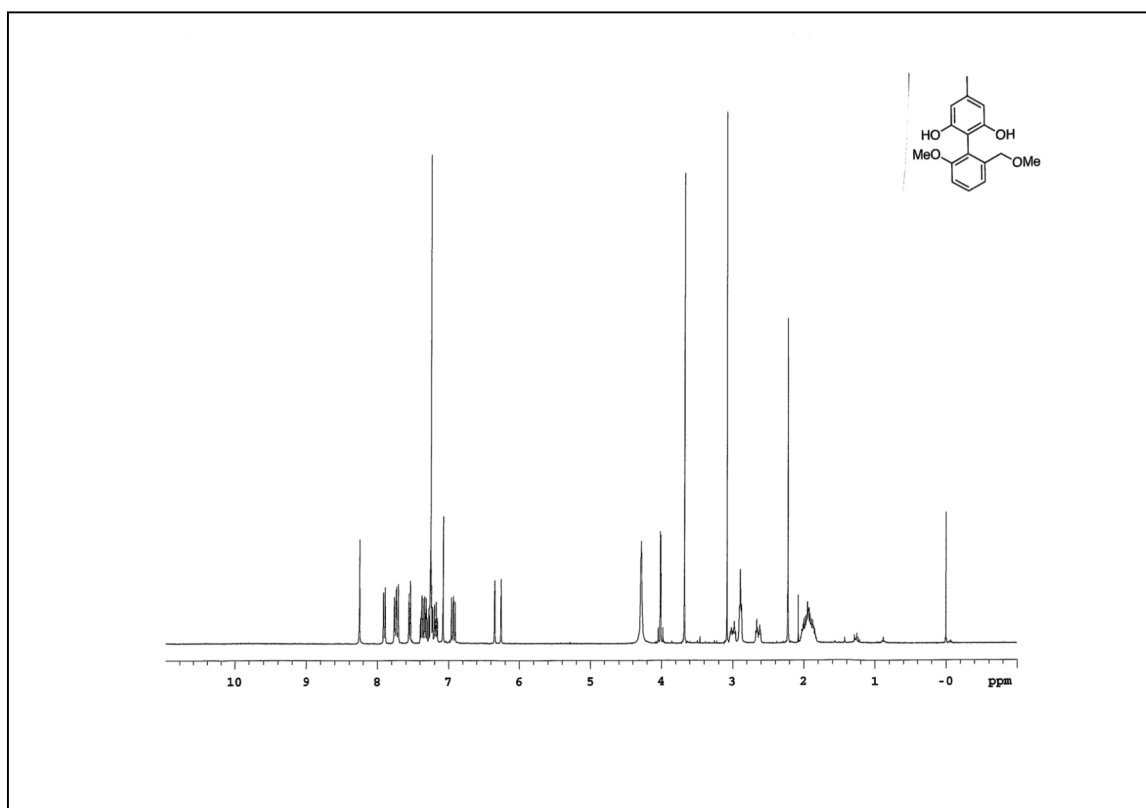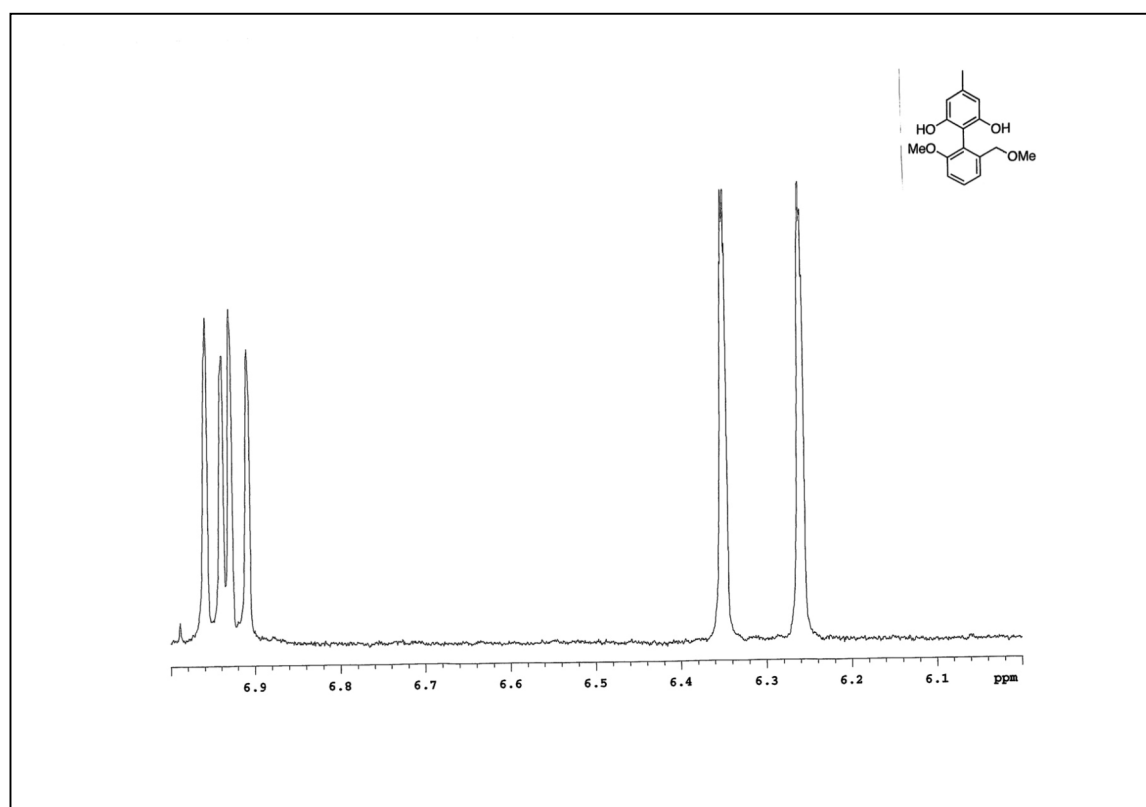

$^1\text{H}$  NMR spectrum of the mixture of **3l** and **2j** (X = 9-anthryl).

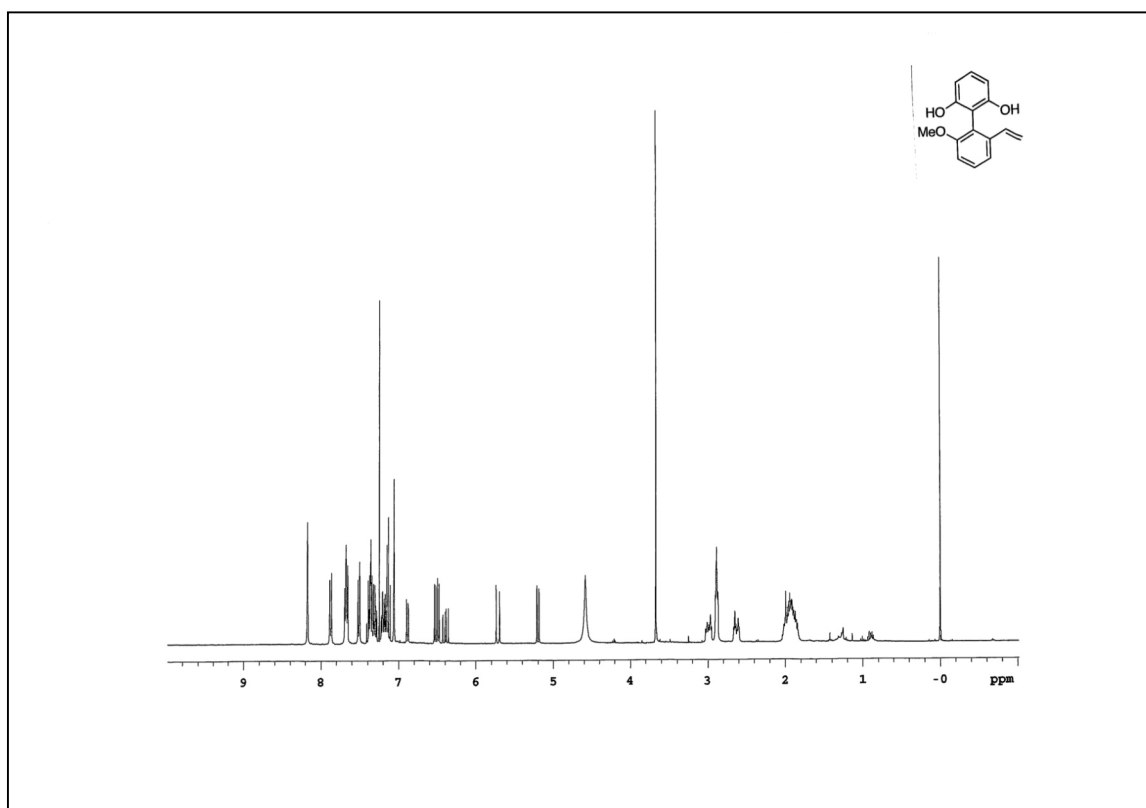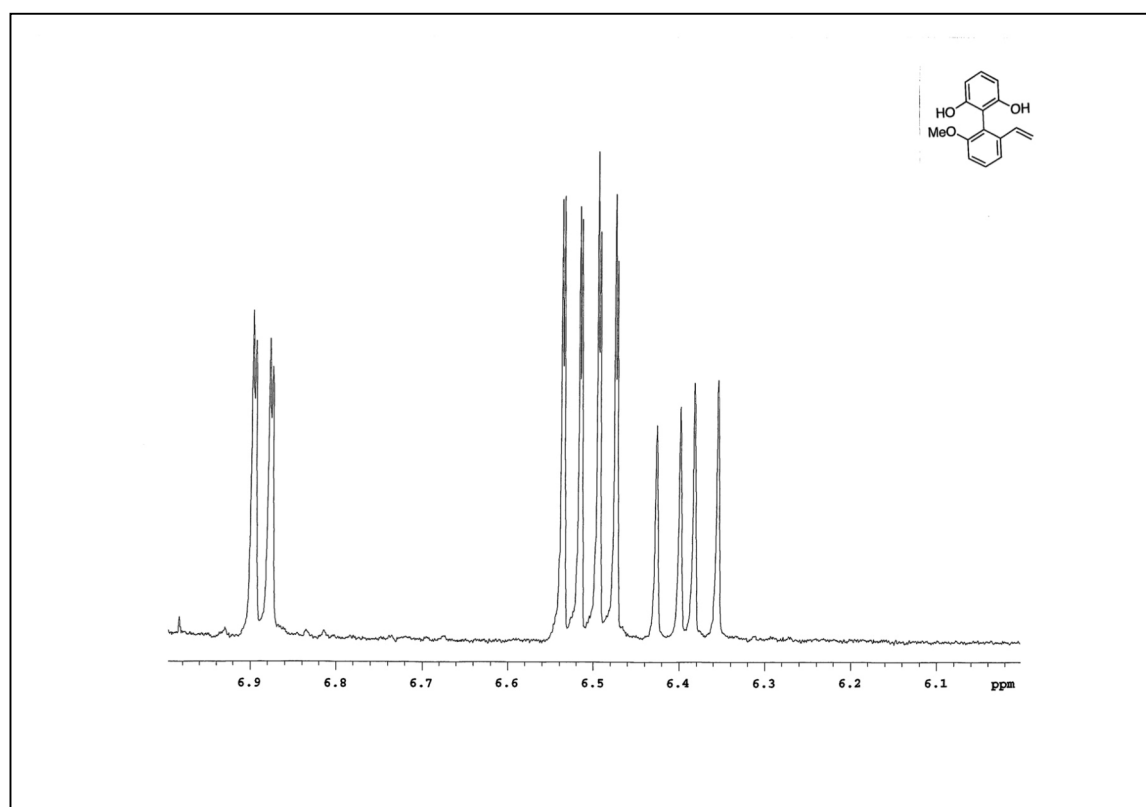

$^1\text{H}$  NMR spectrum of the mixture of **3m** and **2j** (X = 9-anthryl).

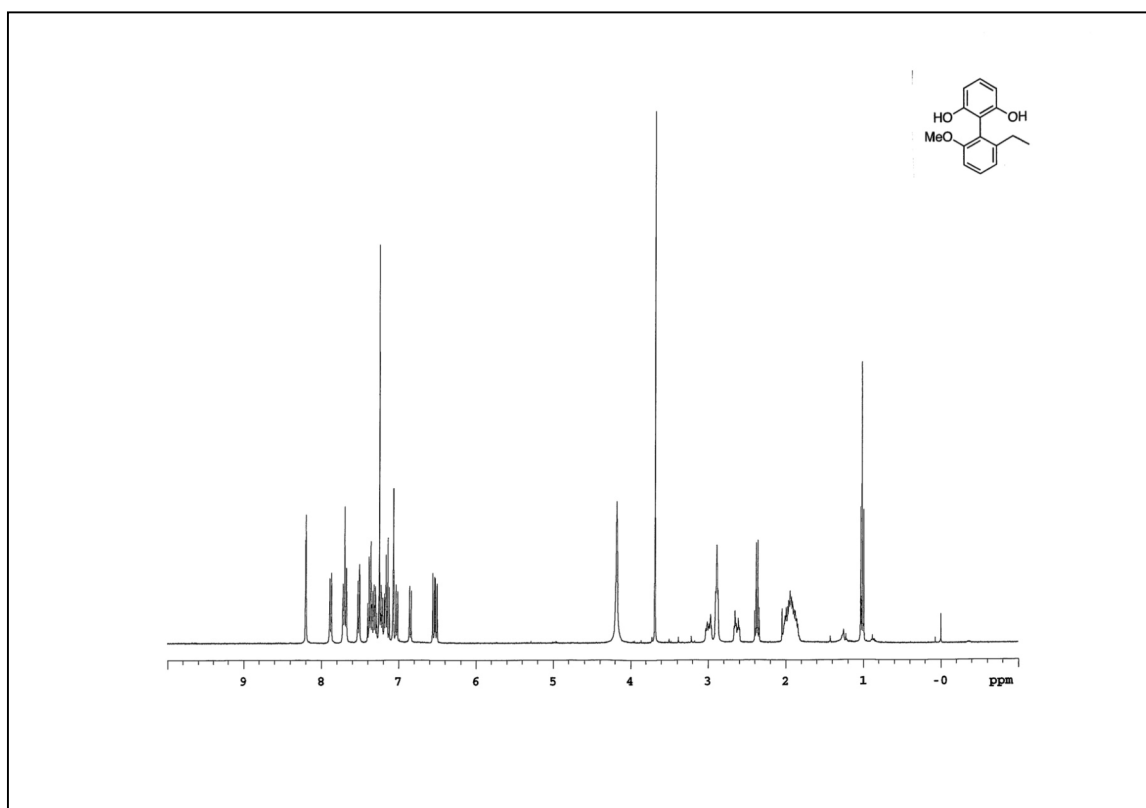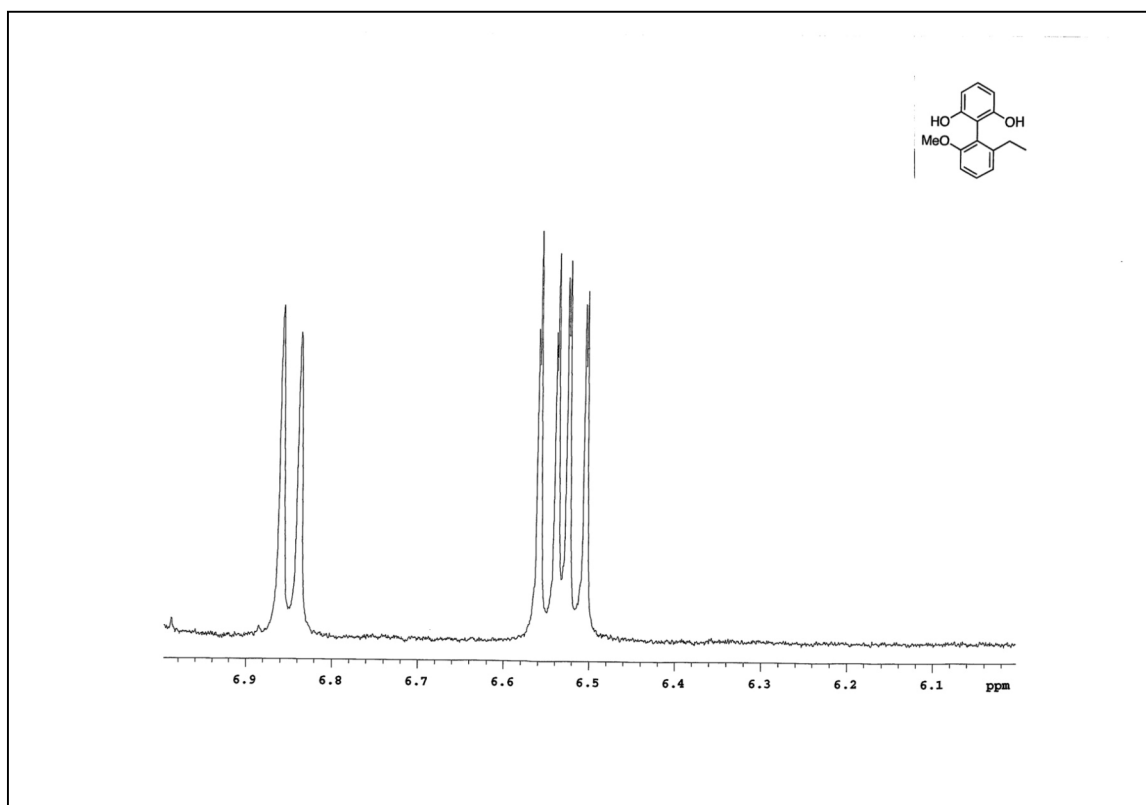

$^1\text{H}$  NMR spectrum of the mixture of **3n** and **2j** (X = 9-anthryl).

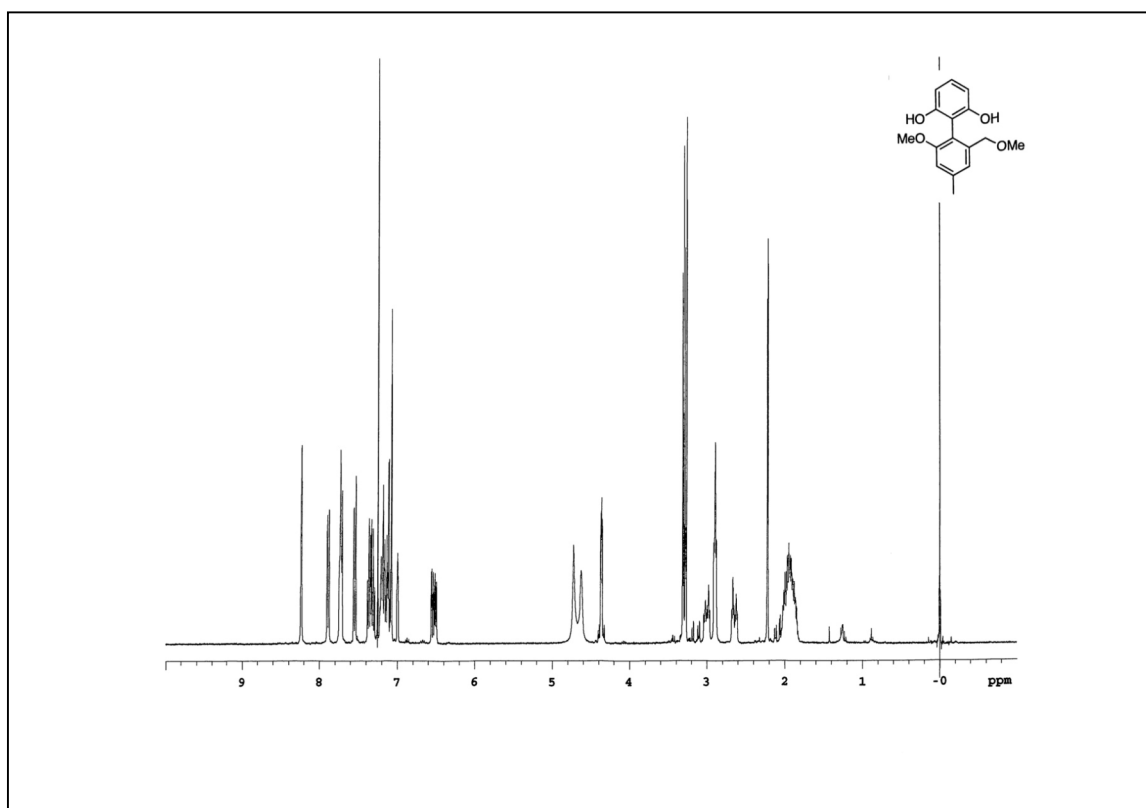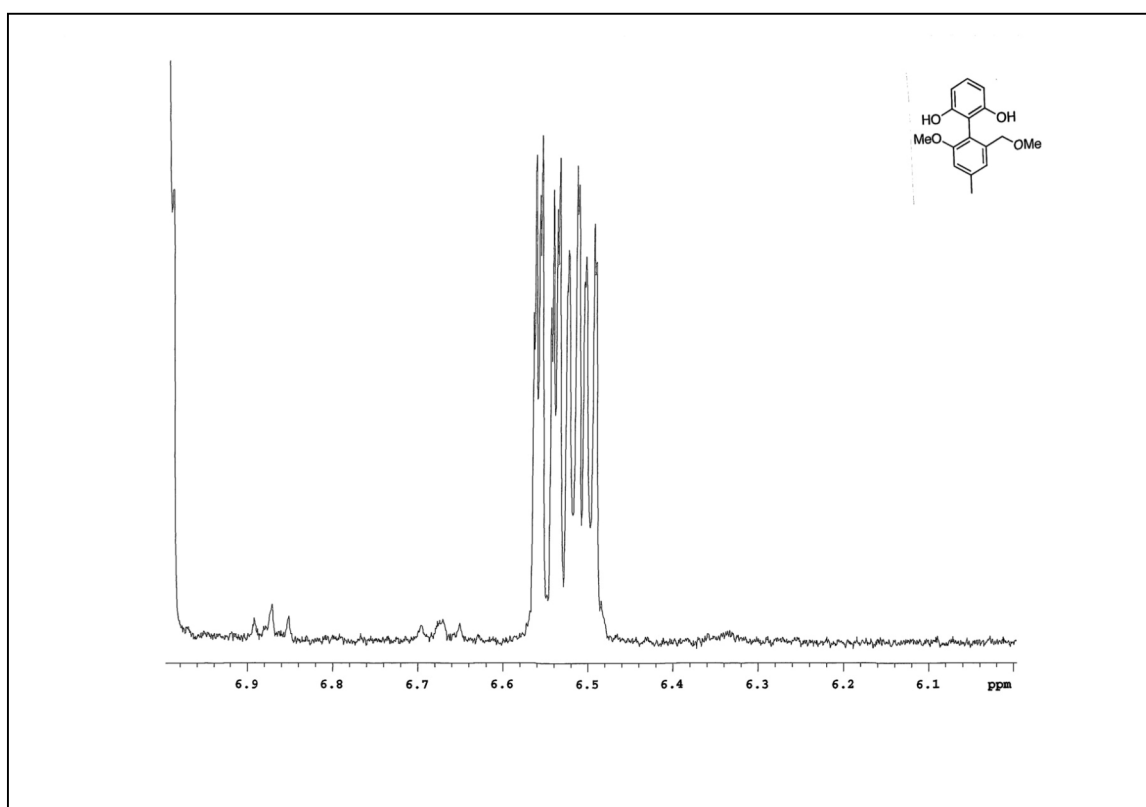



$^1\text{H}$  NMR spectrum of the mixture of **3o** and **2j** (X = 9-anthryl).

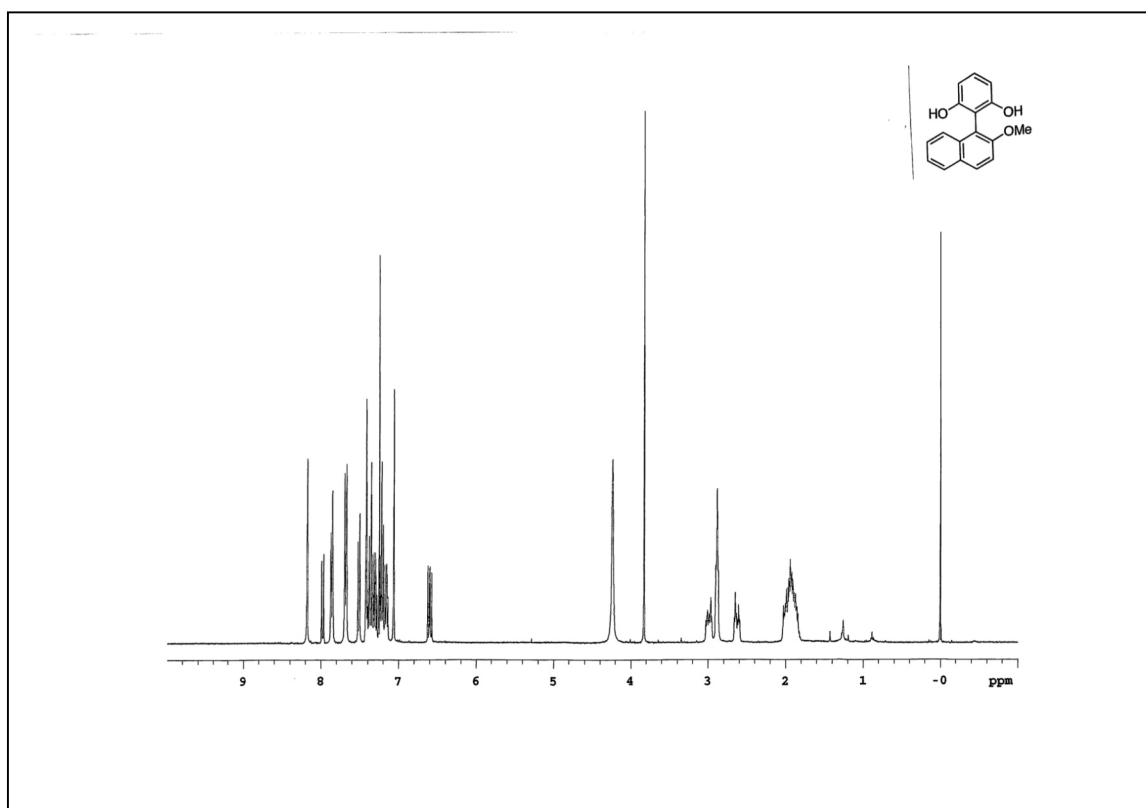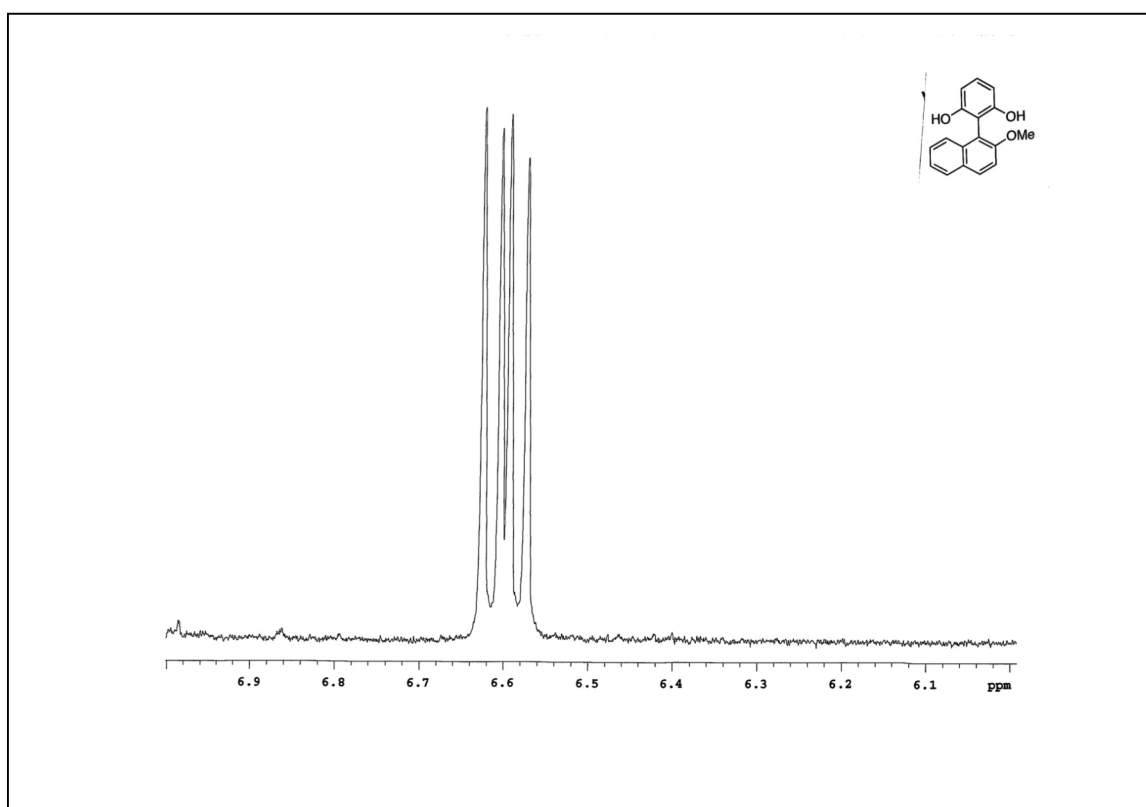

$^1\text{H}$  NMR spectrum of the mixture of **3p** and **2j** (X = 9-anthryl).

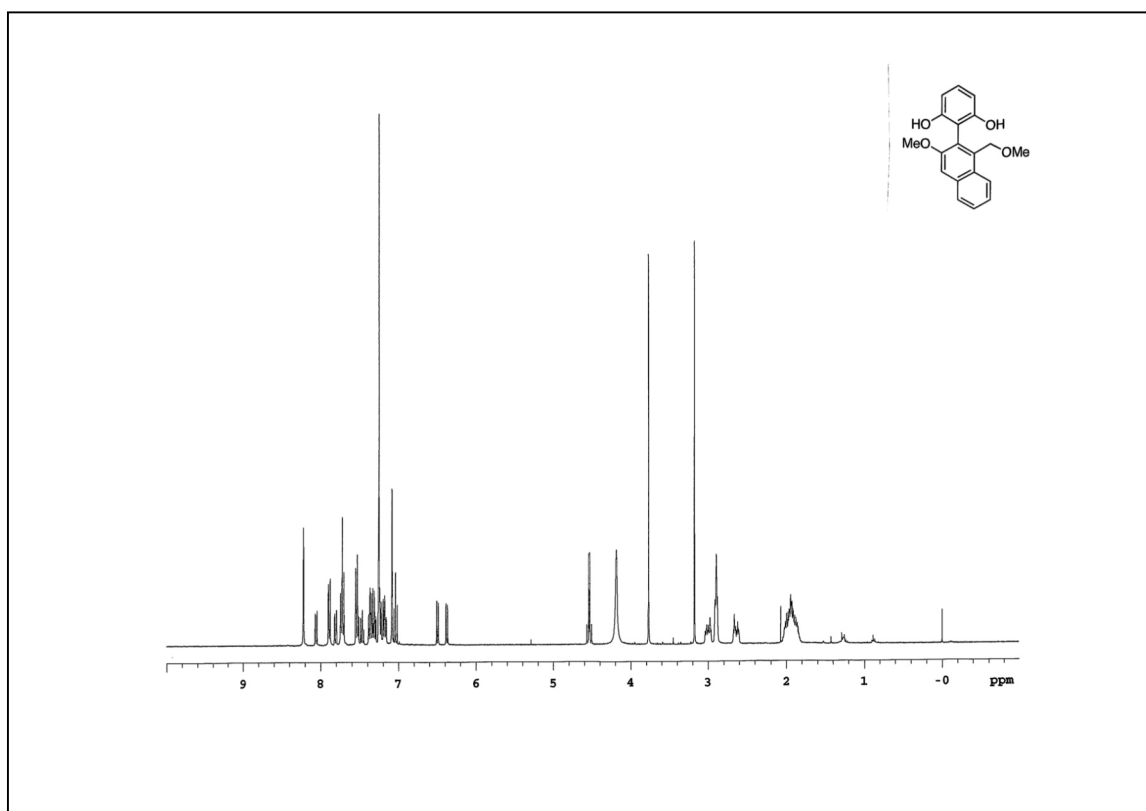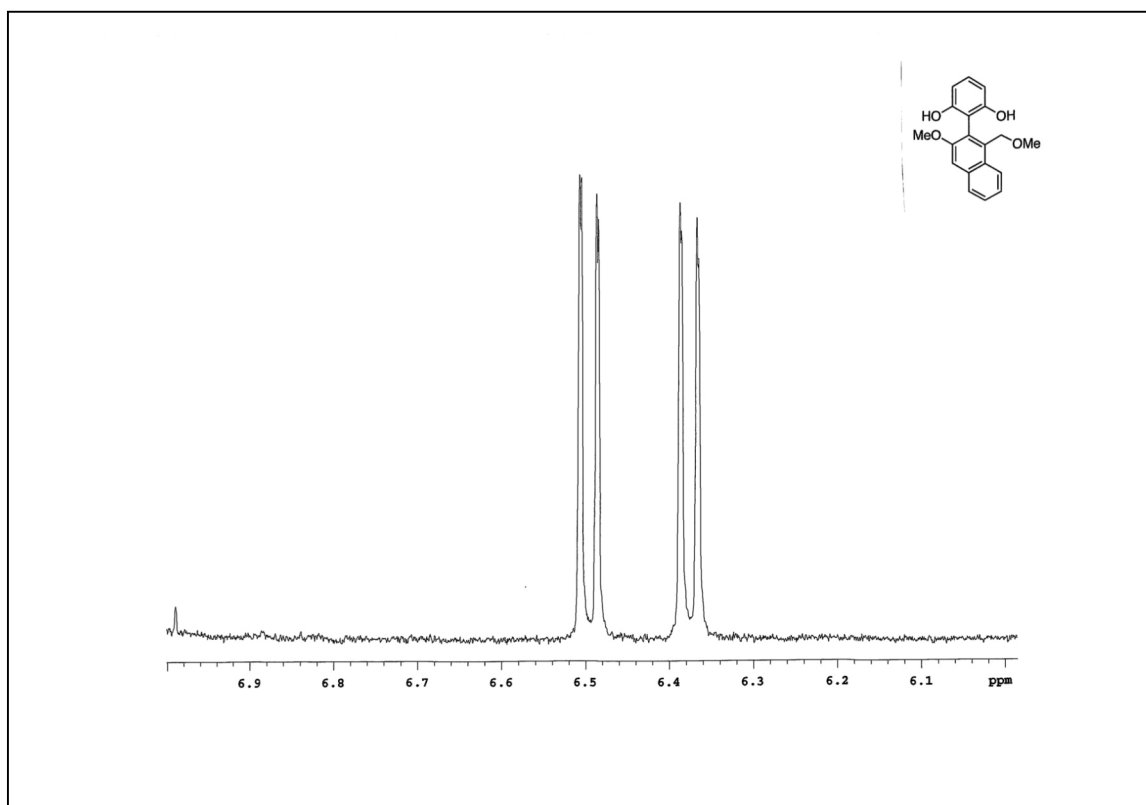

$^1\text{H}$  NMR spectrum of the mixture of **3q** and **2j** (X = 9-anthryl).

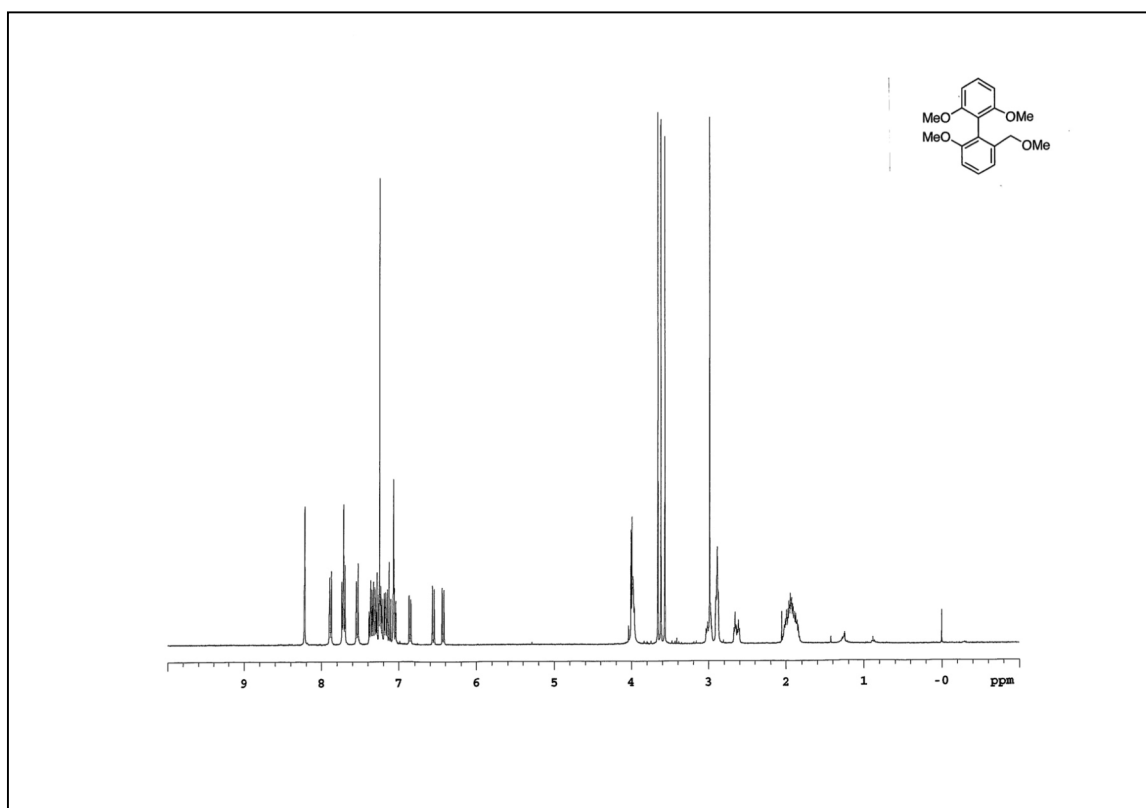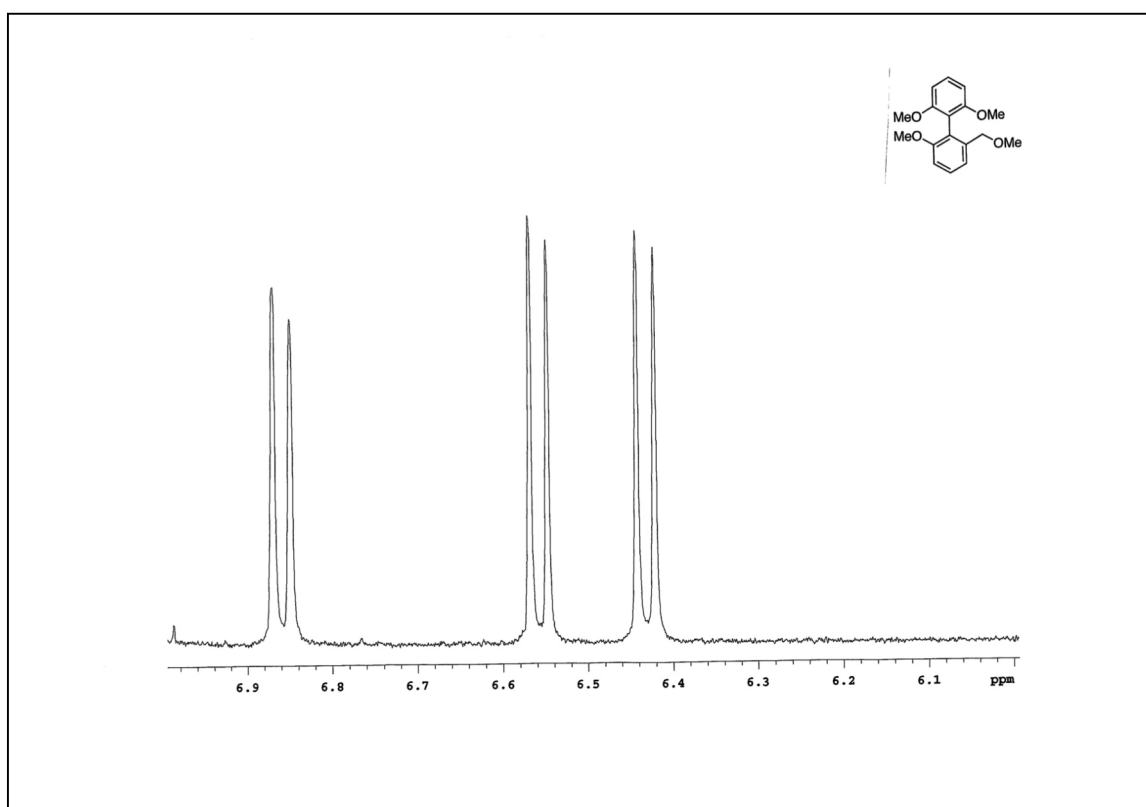

$^1\text{H}$  NMR spectrum of the mixture of **3r** and **2j** (X = 9-anthryl).

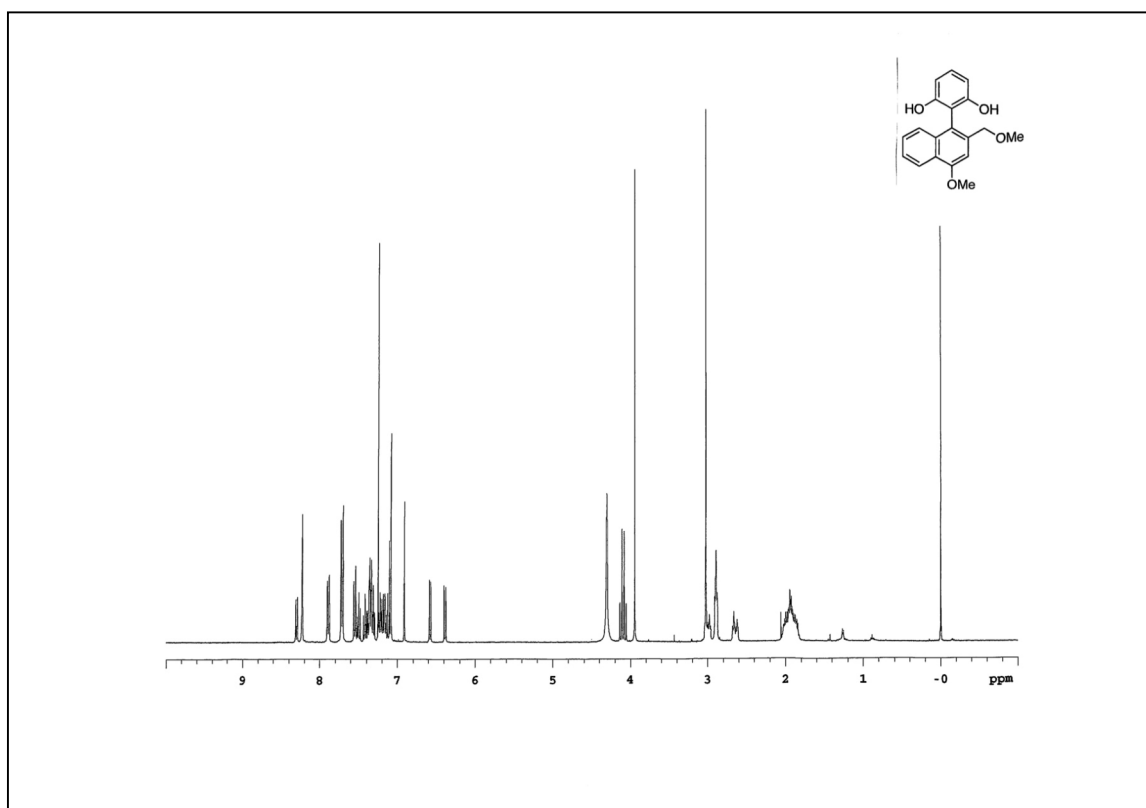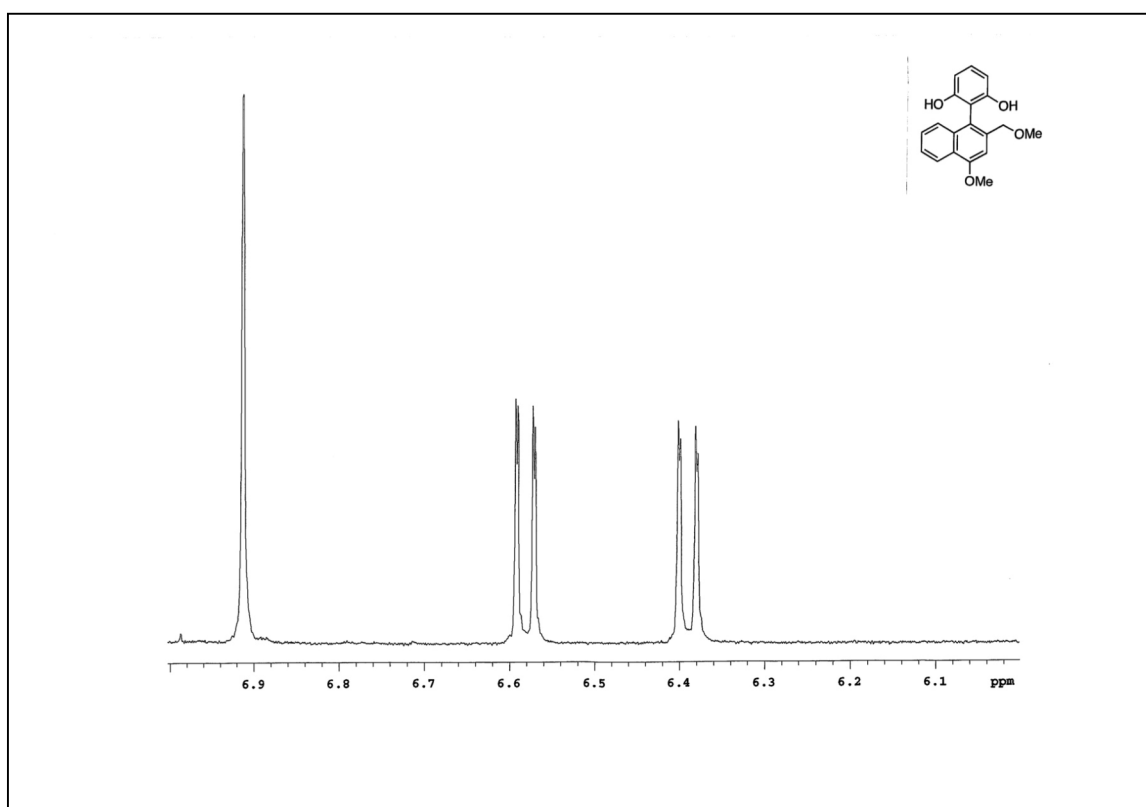

$^1\text{H}$  NMR spectrum of the mixture of **3s** and **2j** (X = 9-anthryl).

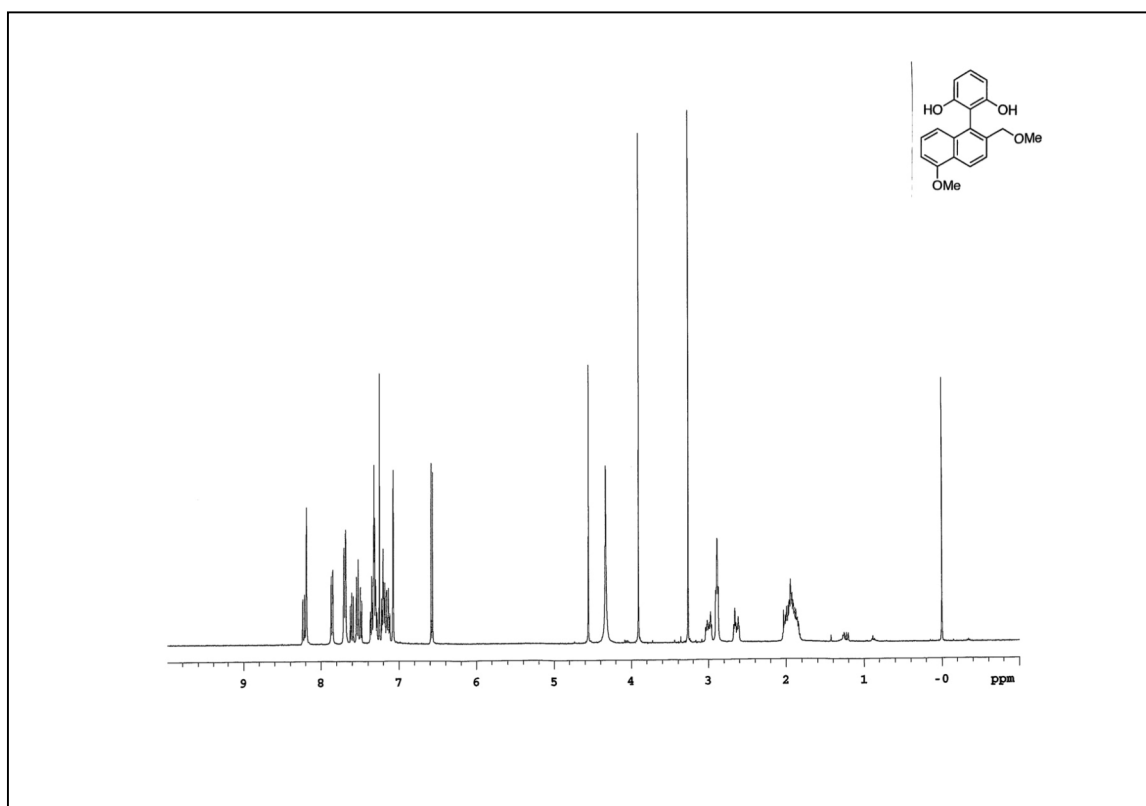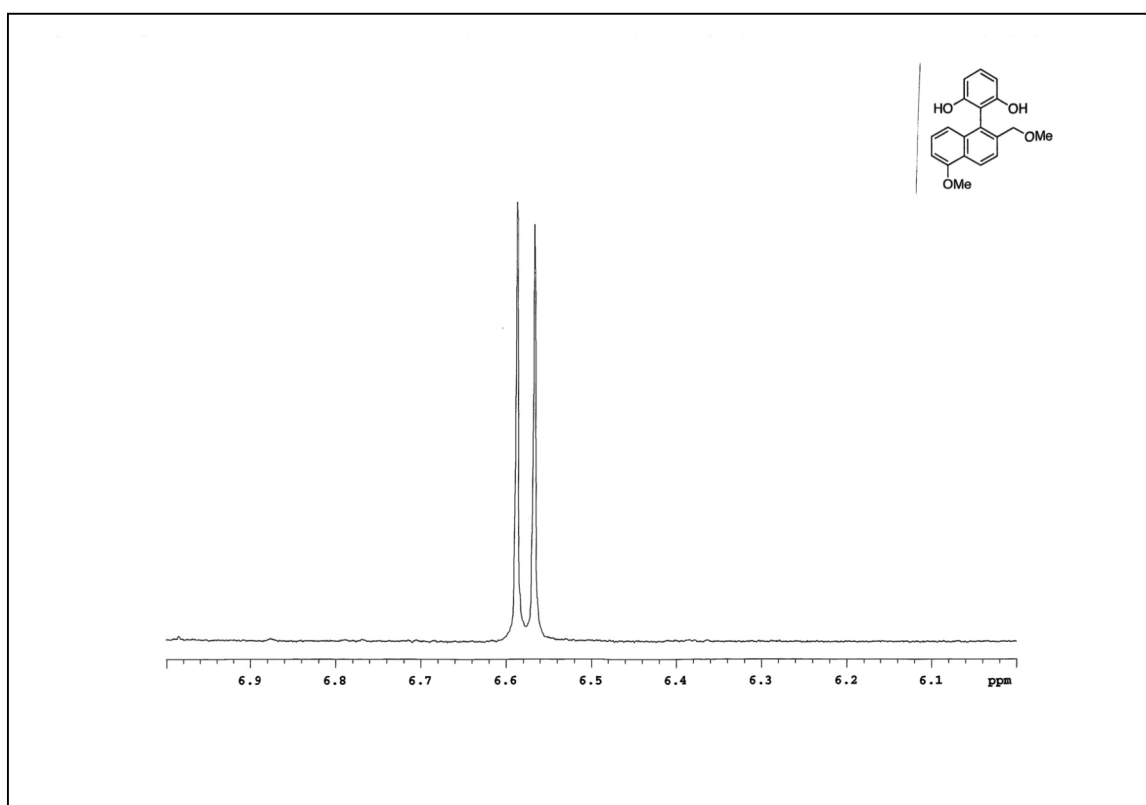

$^1\text{H}$  NMR spectrum of the mixture of **3t** and **2j** (X = 9-anthryl).

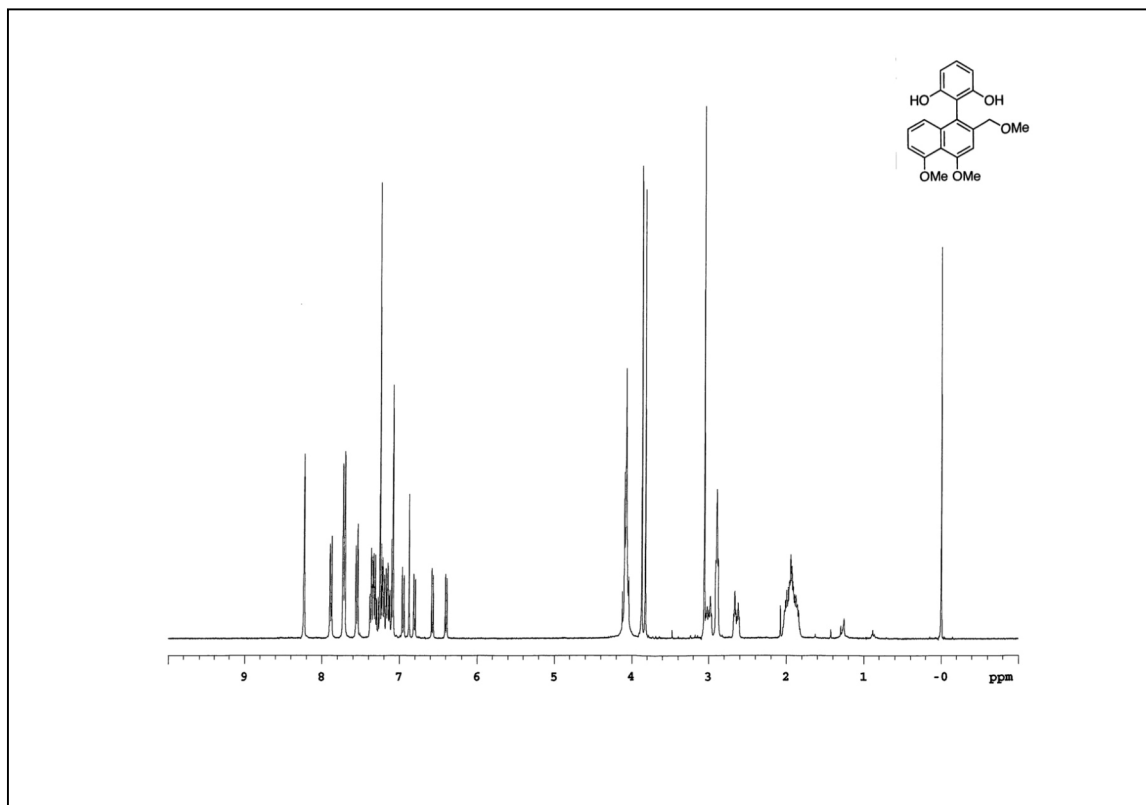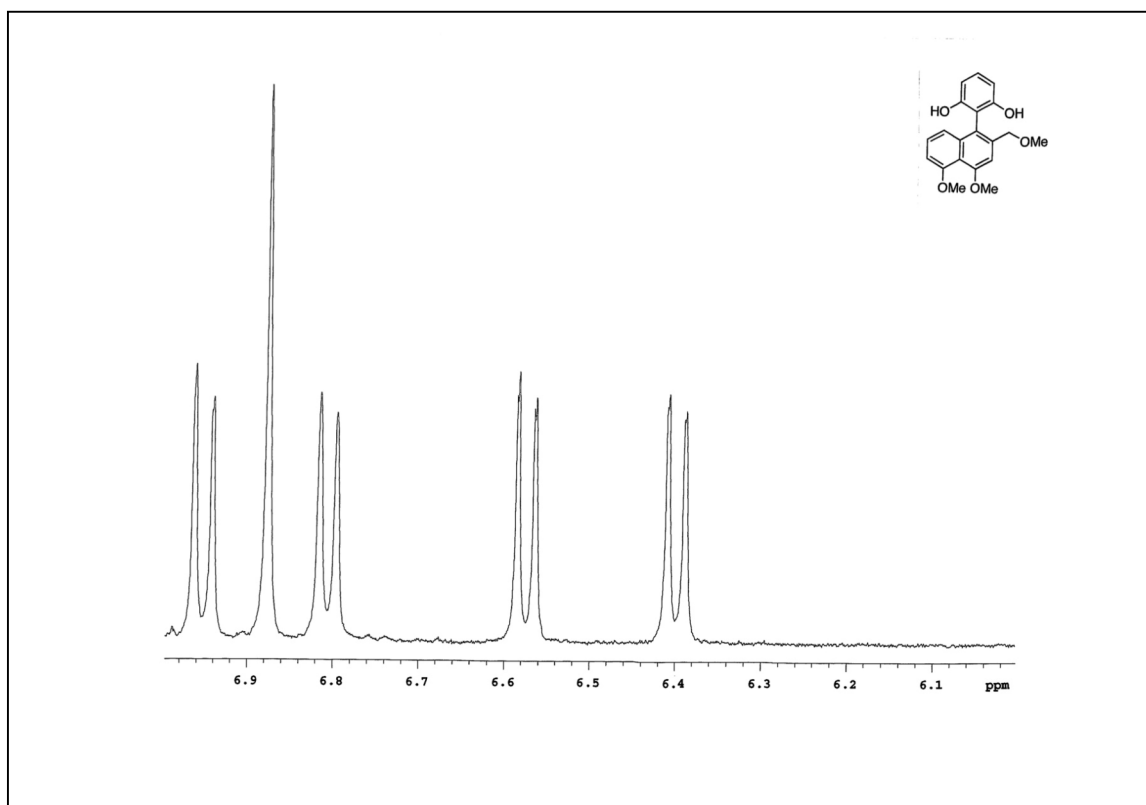

Supplement: c3sc52142g_2.pdf [file c3sc52142g_2.pdf]
